# Supplementary material for: Repurposing the mammalian RNA-binding protein Musashi-1 as an allosteric translation repressor in bacteria
Source: eLife. 2024 Feb 16;12:RP91777. doi: 10.7554/eLife.91777 (PMC10942595; doi:10.7554/eLife.91777)
Supplement: Figure 1—source data 1. [file elife-91777-fig1-data1.xlsx]

## Sheet: fig1c
lac	gfp mean	gfp std
1	150.697	1.82127
5	150.181	2.54736
10	151.479	1.49543
20	151.47	2.45884
50	132.144	4.40714
100	102.538	2.65948
200	86.5383	2.58428
500	70.3397	2.65371
1000	60.2919	2.85841

## Sheet: fig1d
bfp mean	gfp mean	bfp std	gfp std
1.18482	150.697	0.66806	1.82127
2.05588	150.181	1.63298	2.54736
1.73535	151.479	0.648647	1.49543
1.34718	151.47	0.0340224	2.45884
1.44809	132.144	3.15649	4.40714
4.87691	102.538	6.61282	2.65948
4.81285	86.5383	1.0842	2.58428
18.7354	70.3397	2.21909	2.65371
23.6511	60.2919	3.77141	2.85841

## Sheet: fig1e
gfp/rfp ratio mean	rfp * mu mean	gfp/rfp ratio std	rfp * mu std
1.7312	47.0729	0.025513	0.680891
1.73866	47.3101	0.0530936	0.736667
1.71781	46.6434	0.0182102	0.534338
1.7151	48.4732	0.0449329	0.450243
1.55776	46.6815	0.0603282	0.416792
1.23487	47.87	0.0409053	0.588622
1.1524	41.494	0.0368661	0.319211
0.899392	44.3068	0.0574531	0.904557
0.75987	44.2814	0.0488304	1.21663

## Sheet: fig1f
lac 0	lac 100	lac 1000
3141.54	828.733	587.14
1428.69	1800.69	1381.36
2823.69	1944.73	901.893
1593.19	992.413	364.353
2380.59	868.827	877.093
2967.94	1935.02	644.387
1840.16	1096.99	1101.95
2596.35	1077.97	633.433
1922.62	2071.01	1164.98
1090.79	1349.33	632.813
1489.86	776.033	751.233
2625.91	1500.4	1379.29
2142.72	1612.83	1050.69
1917.87	1768.65	713.62
1747.78	1921.59	1004.61
2694.52	785.54	1391.69
1984	1821.97	1087.27
1844.5	1073.01	950.047
1901.95	2231.79	659.267
2893.95	1650.03	1772.58
1806.27	1678.34	693.78
2172.69	2313.01	356.087
3413.1	1359.25	572.88
2096.63	2947.27	1162.29
1324.73	2097.25	1292.49
2076.17	1549.79	674.973
1051.31	1787.46	604.913
2305.99	656.373	1225.95
2080.31	1460.51	1580.17
1210.86	1235.87	754.953
4667.98	2477.11	573.5
3058.05	1111.25	1169.11
2196.25	925.04	534.853
2911.73	2101.39	960.793
2526.29	891.56	858.907
1249.3	1599.19	1224.29
980.633	811.373	957.487
3109.09	1899.68	773.967
2092.09	879.573	1306.55
1544.42	1240.83	816.54
1525.41	2071.63	1265.42
982.287	2086.51	1258.39
2044.97	2572.17	869.653
1055.24	1366.07	738.213
1315.02	1701.07	709.487
1865.37	1195.98	315.167
1386.94	774.38	1228.22
1266.04	3047.51	660.093
1550.21	1718.02	1199.7
1744.47	1869.92	953.147
973.607	1557.03	724.573
2227.66	1471.05	1413.6
3684.25	621.86	681.38
3948.16	1167.87	910.573
3459.39	2356.83	450.327
3439.35	1064.33	472.44
1153.41	1034.78	825.427
2384.93	2378.73	1102.77
6279.15	2757.97	1756.87
4128.58	2461.61	795.667
1139.97	1772.58	1593.19
1001.3	2413.04	770.04
1198.05	1410.5	682.62
1904.85	1110.01	1015.35
887.22	1143.49	637.773
2688.32	1345.19	888.047
1325.77	1099.88	833.693
1423.73	1217.06	1087.07
1083.14	1878.39	479.88
2619.29	942.607	413.127
1367.31	1310.68	842.167
4422.87	2665.79	415.4
3167.99	2004.67	993.033
1499.99	3278.35	857.047
2299.58	1196.39	419.12
1527.06	2726.97	901.067
3352.55	4050.87	652.653
2959.67	1009.77	785.54
2396.3	2188.39	412.713
1240.83	1552.89	814.473
1977.59	1002.13	493.933
1718.02	2199.14	512.74
4368.31	908.507	335.213
2683.15	1496.06	477.607
2490.95	1279.89	593.547
2171.24	1201.15	465.62
3097.31	803.313	558.827
2250.19	1389.42	641.907
1626.67	1003.37	1187.3
1447.7	1616.13	1074.05
1731.66	787.4	1701.07
1528.51	1932.33	1473.53
1159.81	1651.68	1151.13
3763.19	2598.83	807.86
1400.17	1802.34	930.62
954.8	1646.51	1202.18
1177.79	2391.34	584.04
3628.24	1718.43	864.487
788.847	1471.26	720.44
4326.98	1814.53	767.56
1010.39	957.693	1007.09
2265.27	4045.91	1492.55
3985.57	914.913	1107.11
2223.32	4118.45	1509.49
2269.82	1821.97	327.773
2620.33	1538.01	1159.81
1532.64	1126.33	740.28
2087.75	1565.5	1224.91
1079.83	2393.41	1092.85
1757.29	3370.53	1807.51
2662.07	1087.07	487.94
1524.79	1976.77	1259.22
1514.45	745.447	862.42
2357.03	877.507	928.967
1411.95	1196.81	709.487
2720.35	2451.27	570.813
2098.49	1097.19	950.047
1595.88	1556.2	1185.44
2275.61	1073.22	1237.52
2447.76	1211.69	531.753
1805.23	994.273	841.133
1552.07	1542.35	1501.23
1832.72	3786.34	871.307
4875.27	1583.27	577.22
4672.94	1439.85	1212.31
1905.47	2661.66	2129.29
1192.47	971.127	1047.39
2458.51	1725.05	611.94
3656.35	2519.27	923.387
2153.67	3440.79	841.547
1261.91	4504.71	1291.25
1789.32	1061.44	443.92
2113.17	851.26	1564.05
2444.25	1198.67	1303.45
2650.71	2555.23	385.64
2251.63	1738.69	745.033
1921.38	1336.51	318.887
1862.48	2078.65	641.493
2248.95	1678.55	806.62
1145.14	2493.43	665.053
2285.73	1292.91	1325.35
1383.63	924.833	406.927
1831.69	1285.88	868.827
2484.75	831.007	880.4
1214.58	1942.25	807.653
3281.87	2443.21	1265.63
5982.79	749.167	1083.35
2227.45	2161.11	438.34
2572.59	1879.01	758.467
1458.45	2028.85	1047.39
3622.45	868.413	1048.42
1028.99	1913.11	1567.15
2513.07	1615.72	625.787
2111.93	718.993	1191.43
1120.75	4553.28	885.36
1434.68	1148.03	1391.49
2639.96	1272.65	803.52
877.92	1679.37	1010.6
1100.29	1698.59	1278.65
2803.64	1145.14	535.68
2828.65	2413.45	801.453
2229.31	1341.68	465.62
911.193	2614.95	432.553
1406.57	1017.21	551.18
1322.05	1758.73	1394.38
1098.02	1067.02	1402.23
1540.29	1028.99	1224.09
1896.17	2120.19	1426.83
1921.17	4694.64	1280.92
2576.72	1487.38	976.707
1129.64	1520.45	1561.99
1071.15	1063.3	368.487
1490.89	2483.51	1520.65
2572.38	1520.03	1030.23
2503.97	1419.18	861.8
1737.65	1963.13	772.727
1567.57	1757.29	1181.1
3752.65	1728.35	610.907
1420.01	1621.51	729.947
719.82	3023.33	940.127
1396.24	862.213	825.84
804.553	1418.77	943.64
5745.54	1941.01	469.753
1142.25	1590.3	537.127
2893.54	2407.25	771.487
2135.9	1298.28	484.22
3115.71	1487.79	953.147
1165.39	702.253	289.127
3176.67	1828.79	2086.09
2300.2	1715.13	3357.09
2364.89	739.453	509.433
1266.04	1746.33	686.547
1509.7	1667.8	508.607
2599.04	1634.73	737.8
2259.49	2170.83	874.407
5090.82	1524.58	1730.83
2858.41	2085.89	1557.44
2665.17	4245.76	989.313
2648.64	1378.67	683.653
1760.59	2457.47	929.173
2206.37	1072.81	660.713
1184.82	1861.03	666.707
1718.02	1768.65	779.133
1625.02	1190.4	556.76
1549.79	1339.41	1761.21
2340.09	4401.79	636.947
1097.61	1882.53	513.773
2401.67	1861.65	893.42
2994.6	1453.28	978.36
1446.25	1274.51	1995.99
2374.81	1413.6	999.027
1459.89	3849.99	618.347
2637.69	1449.56	614.42
1051.73	1699.42	1388.18
1276.79	2728.21	1120.55
1383.63	1056.89	494.76
1223.26	1638.25	755.573
1219.75	1448.53	599.54
1361.93	1329.49	493.107
1725.25	1949.07	421.6
2818.73	1104.84	733.46
1944.94	1186.68	1331.55
1883.97	990.553	1331.55
2674.47	1794.49	375.513
1726.49	3103.72	832.453
2283.05	1718.43	606.36
1056.89	2777.39	1176.55
1416.91	1946.18	1279.06
2836.91	1392.93	946.533
4049.22	1550.62	562.34
1793.87	2353.31	736.973
1359.25	1065.99	718.167
1690.33	725.813	729.327
1192.88	2732.75	719.82
2293.59	652.653	760.12
1716.16	3292.41	707.007
1348.29	1244.96	1932.54
1166.63	1183.37	464.587
921.94	4134.57	1080.25
1329.9	1272.86	418.293
1273.27	841.547	672.907
2844.97	1773.82	675.8
1070.74	3060.73	800.007
1787.25	2405.19	552.833
2207.41	2160.91	667.533
1509.7	1132.33	539.4
1343.54	984.147	940.54
2171.45	1130.26	1308.61
2597.8	1079.21	497.447
822.12	1678.75	807.86
1033.33	2369.64	883.5
2029.26	1045.11	639.427
1485.11	2757.14	725.813
2309.5	1674.62	693.573
1969.12	4697.33	1072.39
1420.01	2061.29	645.007
1450.59	1158.57	845.68
1345.61	2017.48	696.26
1608.69	1891	640.873
2436.19	1648.58	532.373
908.713	1244.75	807.653
2314.87	988.487	922.147
1545.04	1268.31	806
2437.84	1299.31	879.573
2365.51	1366.89	1261.49
2007.56	1679.37	822.74
3234.54	1434.89	582.387
2309.09	1304.07	374.893
2023.06	1134.6	809.72
2701.13	1740.34	1356.35
2178.27	2446.52	1571.29
1723.39	3107.44	648.107
2648.23	1895.13	411.887
1053.38	1178.62	2439.29
2484.34	812.2	1266.45
2357.45	1166.01	1130.67
1702.11	1528.3	722.92
715.067	1052.97	803.107
1761.83	1092.03	602.64
2874.53	1174.28	697.913
1518.38	2828.23	476.367
4730.81	2186.12	688.2
2614.75	3274.43	1467.54
3351.31	2288.42	677.867
1677.93	1903.61	658.647
1475.81	1001.92	758.467
851.053	1677.31	592.307
1720.09	1709.55	306.073
1625.43	3431.91	761.773
1477.05	1172.42	634.26
1394.79	1479.53	483.807
1333.62	1863.1	777.687
1963.13	1719.88	884.533
3459.81	2238.2	603.053
1938.33	728.707	703.08
1697.35	1645.07	779.133
1733.31	872.96	504.267
3012.58	2257.42	1220.16
1122.82	992.207	550.56
1731.04	2069.97	1037.05
1651.27	2297.93	505.507
1428.27	1325.35	801.453
2117.71	1436.95	1943.29
1615.51	1273.48	905.82
1666.77	1274.1	779.753
2216.09	1800.27	984.767
2037.11	1225.53	653.067
1194.33	1933.78	797.32
1574.59	1139.56	1003.78
1269.76	1417.53	687.167
3546.61	1511.35	757.227
950.46	1421.25	583.42
2383.28	1356.77	1026.72
2682.95	2768.71	1297.66
1652.92	4484.25	871.1
2191.49	1123.23	751.44
2002.39	1576.66	682.62
2239.23	1310.47	399.487
2846.83	2054.89	788.02
1577.49	1151.96	1381.36
1959.41	1495.03	1506.39
2108	1592.78	796.907
2539.93	2148.09	992.413
2077.41	2767.27	635.087
2369.43	1942.67	675.593
1193.5	3636.3	743.793
970.093	1716.99	617.313
3904.97	1473.74	631.573
2268.37	1226.36	612.56
2990.05	1304.48	986.007
4125.07	1107.32	542.913
1342.71	1127.57	896.727
1135.84	1683.51	768.8
1898.85	2343.6	929.587
968.647	1435.51	575.567
3420.75	2980.13	920.907
1208.17	1409.67	996.547
1399.13	2118.95	1225.53
682.413	1925.51	788.02
1401.82	1603.32	470.993
2412.01	1517.97	545.6
3483.16	1026.93	1171.8
1598.15	6054.09	526.38
2372.95	233.533	468.307
1651.27	1548.14	276.313
1989.58	1774.85	1321.43
2312.39	932.067	1285.26
3025.39	1143.28	1170.56
2337.81	1331.35	420.773
1290.63	1031.27	953.56
2679.85	735.113	840.307
2605.45	1151.96	912.64
1727.11	1613.24	876.06
2255.97	918.633	575.567
2603.38	1489.45	566.06
1034.99	3041.51	720.027
1391.49	935.993	806.413
3287.24	1614.27	483.807
1912.08	2065.22	660.507
1346.85	3953.33	656.58
1531.19	1131.29	1566.95
1424.76	1582.45	3018.16
1970.98	730.773	690.267
1924.69	1456.38	955.627
799.8	773.76	435.24
2077.62	1129.43	813.647
972.367	1716.16	827.287
2342.98	3394.91	1594.02
863.66	1433.85	435.033
1407.19	2033.19	1228.84
1484.69	1321.43	846.093
3574.09	1133.98	540.433
1765.97	793.187	954.593
2613.3	1839.75	1420.63
1094.09	3069.21	749.993
2466.36	1722.98	622.273
1317.09	1568.81	736.147
1586.79	2796.82	1007.5
2206.79	1636.8	1120.55
922.767	2725.52	745.24
1627.71	1436.75	668.773
4374.93	2473.39	1006.47
1203.42	1352.63	670.84
2092.29	4019.87	543.533
2059.23	684.067	702.253
2261.55	1907.74	517.7
1240.41	1584.93	768.18
1639.28	999.853	576.807
2375.84	2759.62	1249.71
3459.81	2767.47	1394.59
1733.11	1726.08	597.06
1116.83	1648.37	952.94
1820.94	1440.26	571.433
1280.3	1852.77	668.98
1392.31	884.533	551.18
2023.68	1864.13	686.753
3365.36	822.327	729.533
5014.56	992.413	652.86
1076.94	1180.89	327.36
1836.44	1742.61	1998.88
2214.02	2455.61	550.353
1903.61	1633.49	504.68
3477.58	1280.51	1493.58
1735.38	1321.63	1732.28
1418.15	1498.75	940.127
1236.9	948.187	896.727
1229.87	2527.12	736.767
1122.2	1509.29	932.893
1989.37	1780.85	490.007
2504.59	1186.89	901.893
1616.75	3730.13	689.44
1064.13	1598.77	715.48
1806.89	989.933	692.747
1365.65	1113.11	1205.49
1673.79	2306.19	1406.37
1778.16	898.587	905.82
1127.78	1866.41	1406.99
1782.29	2142.72	1938.53
4140.15	1548.35	1060.61
1949.9	2433.5	510.673
2942.31	1757.08	1029.41
1776.92	2369.02	691.92
1137.49	2954.51	833.073
3116.95	1731.45	548.287
1559.3	1746.13	607.6
1703.55	1367.51	777.687
1313.37	1463.2	760.533
1463.2	1264.18	919.253
2072.87	671.667	529.893
880.4	1299.93	850.64
1907.53	946.74	479.467
1334.24	1481.18	683.86
2791.86	1528.92	508.813
1507.22	1308.61	1012.25
1606.63	2414.9	1511.35
4698.57	924.833	918.013
3110.75	1434.47	654.1
1448.94	761.567	848.987
1187.3	2114.61	653.273
6949.37	1883.15	573.087
5575.87	1803.79	959.76
2121.02	718.993	865.727
1646.72	1087.48	609.46
1822.59	1464.23	1318.74
5755.25	1526.44	758.053
2942.93	1455.97	983.527
1200.11	1245.58	1428.27
1451.83	2241.71	611.113
1836.44	1507.22	576.6
1875.71	1198.87	1272.03
1851.73	730.36	448.467
2569.28	1134.19	1712.23
1773.61	4179.83	766.527
2210.51	1985.03	996.96
1376.81	1057.93	761.153
2293.59	5156.54	792.567
2862.54	3445.75	848.573
2046	1859.79	1071.98
2903.05	2392.17	786.573
987.247	2038.77	712.587
2513.48	1921.17	536.3
1094.92	1746.33	832.247
1132.12	1326.59	949.427
1559.09	2227.25	571.847
982.907	1138.11	555.107
2260.93	1325.35	674.147
2511.83	904.167	668.153
2127.84	927.727	1240
1793.87	769.627	466.86
1521.48	980.427	614.627
2853.86	1279.68	433.173
1131.09	2418.62	939.92
913.88	3464.77	916.153
1117.45	2497.57	859.32
1907.12	1691.98	581.973
1487.59	1318.74	717.133
1039.74	1324.73	1380.95
1640.11	1816.39	820.053
1439.23	1001.92	949.427
1429.1	1077.35	860.353
1598.15	2354.14	627.233
2222.08	3314.11	813.027
1383.63	4400.97	730.98
1621.09	1883.77	837.827
1397.69	1101.74	1043.46
3278.77	1821.77	563.993
3553.22	1679.99	858.493
2784.63	1013.91	856.013
1034.78	2371.09	926.693
1321.22	905.2	1322.67
2784.63	1546.28	693.573
1453.9	1600.01	874.82
1316.26	1010.39	873.373
1455.55	1193.29	1948.45
909.333	877.507	486.7
2472.35	1517.97	670.84
1160.85	2313.63	1014.53
2202.45	1049.25	771.073
2789.79	1361.31	736.56
7480.71	926.28	596.647
967.407	2044.35	733.46
2352.69	1583.27	1031.06
1437.37	1700.66	599.54
2268.58	1916.63	722.3
1320.81	1462.79	391.427
3813.21	3151.87	1174.49
1311.71	1654.78	733.46
1639.28	1772.37	786.987
2952.23	1617.58	587.553
2097.67	1336.31	422.633
1874.26	1315.23	1452.04
1138.73	806.413	744.207
1787.87	1077.77	1060.61
2167.52	653.893	1615.72
1504.53	3254.59	714.653
2323.55	994.48	564.407
1763.9	3366.6	859.32
1217.06	2116.68	704.113
7492.7	2452.93	568.127
3623.07	902.927	527
2203.48	1936.05	1737.03
4612.18	2147.27	779.547
1590.09	1889.55	691.093
2107.59	1895.55	797.113
4568.57	2171.86	768.18
3030.15	877.713	398.453
1069.71	915.947	1439.43
2066.67	784.507	901.067
2927.02	1922.83	1320.81
1008.33	2144.58	833.9
953.56	1762.04	704.32
2002.6	1960.23	1289.39
2349.8	2932.6	718.373
1153.82	1172.83	1003.99
3005.14	1457.62	1249.09
1566.33	2526.5	544.98
1708.31	1188.13	399.9
1946.8	949.427	981.047
1245.37	2051.37	1296.83
1699.83	1826.93	1259.22
2938.39	2309.91	497.86
3270.91	1671.11	653.273
3989.49	2181.78	635.913
1773.82	1390.04	392.667
1128.61	1373.92	637.98
2301.44	1137.08	847.54
1570.67	1206.31	704.32
1715.33	1619.03	1555.37
1241.86	1924.69	752.06
2100.56	995.927	690.68
1400.99	1553.93	899
1424.55	1328.25	679.107
2615.57	2123.5	1003.99
2212.99	1710.79	1076.11
2483.93	1353.87	1220.78
1782.09	3833.67	797.113
2700.51	976.293	306.073
1073.01	1143.07	520.18
2523.19	1909.6	860.147
2078.45	946.947	941.573
2316.73	1359.87	479.88
2113.79	1412.36	661.127
2820.17	2487.23	811.373
2096.43	1274.51	1329.69
1584.31	1215.41	673.527
1740.55	2556.88	566.473
1681.23	872.547	1264.59
2163.8	1241.03	1320.19
2138.59	1196.6	617.107
3393.47	1092.44	1304.27
3437.9	1111.25	873.58
2566.59	2276.64	774.793
1525.2	1342.3	834.727
1402.85	1044.7	668.98
2582.51	1271.21	710.727
2491.57	1630.19	1750.88
5803.61	1495.23	497.033
3387.47	949.427	1180.69
1076.53	1189.78	885.36
849.813	3951.67	896.933
3114.67	994.893	797.32
1245.17	1322.67	621.447
1082.93	1733.52	736.56
4630.99	1779.19	756.813
2682.33	1832.31	917.187
1057.51	1815.36	591.48
1709.75	2974.35	1189.16
1968.5	1346.02	1019.69
1172.63	1535.12	1078.39
1764.11	1612.21	1445.01
1387.97	830.593	1625.02
1497.71	931.653	1007.5
2511.83	1137.08	573.087
2021.2	897.76	914.913
2970.42	2197.49	776.86
2713.33	941.367	808.893
1106.91	2475.87	476.78
2731.93	2875.56	1591.33
4209.39	565.233	627.233
1763.9	2172.89	1036.64
1573.35	1701.9	810.133
1428.07	990.553	718.167
1604.35	1444.19	1489.86
1799.24	1107.53	852.087
2016.65	2434.95	666.707
2071.63	1239.17	1063.51
4674.39	1750.67	577.013
1504.53	639.84	1321.43
1363.79	1270.38	682.827
1929.65	1178	1101.74
1464.03	1073.22	556.967
4372.03	2075.35	700.807
1220.37	773.14	2068.53
956.453	2222.29	555.933
2982.41	772.107	706.387
2805.09	1787.46	761.98
1908.36	903.753	824.187
927.727	1357.18	1801.93
2677.99	1059.79	867.173
1642.59	3354.61	1092.23
1855.04	2137.35	615.247
1923.65	1311.3	2854.07
3576.57	1587.41	430.693
1909.39	2526.91	903.96
2457.47	3751.21	643.767
983.94	1582.86	963.893
1414.63	1721.12	429.66
3281.87	2003.01	521.833
983.94	2567.83	589.207
1356.35	2003.01	504.473
1465.89	4168.26	910.573
1626.05	1482.01	975.26
2535.18	2153.47	619.38
1933.57	793.187	1059.37
3126.25	1311.09	864.28
1990.61	2558.33	887.013
2410.15	3666.68	1085.21
2365.3	1582.45	941.573
1396.65	804.14	1070.53
2195.42	2866.26	667.327
1501.64	983.733	365.18
7080.61	3525.32	497.033
5162.74	1971.6	571.64
1396.45	1689.09	519.56
2229.52	946.533	654.927
2302.27	1859.17	658.853
2833.4	2013.97	651.207
1813.09	1230.7	758.26
1520.03	2230.55	810.34
3190.11	1983.17	460.66
975.88	2277.88	804.967
2485.99	3364.53	1093.06
2560.6	1123.23	499.513
1259.43	1840.37	694.193
4270.77	1175.31	771.487
3458.57	2097.87	1572.94
2242.13	1126.13	807.86
1547.52	1800.89	620.827
1341.89	2773.47	346.58
1871.99	2840.43	1194.95
1162.71	2897.05	801.247
2705.68	1752.12	1521.48
2378.32	1167.87	593.34
4180.04	1081.9	746.893
1249.09	1038.09	956.04
1808.13	1381.36	1218.71
1232.35	1024.45	563.787
2005.08	2061.71	535.06
1215.41	1405.75	775
1550.62	2114.2	1709.55
2165.66	1384.67	654.927
676.42	1092.85	615.04
1966.02	1742.2	763.633
1315.02	1130.67	697.5
879.573	694.4	416.847
2889.61	875.44	1012.87
2734.82	1601.05	771.693
1695.91	1348.5	567.713
1075.7	1045.73	613.387
2568.04	2223.11	788.227
1167.46	855.6	928.76
3938.45	1149.48	1019.69
2072.25	1512.8	1095.33
2331.41	1231.94	608.22
1341.47	1428.27	594.373
1675.65	1169.53	544.98
4252.37	712.587	564.2
1490.48	2376.67	1081.9
3568.51	1582.03	558
2327.07	1295.39	1187.71
2224.56	1883.15	1694.67
1334.65	1071.98	645.42
3422.19	1503.71	606.36
4504.3	2001.36	747.513
1403.47	1638.66	733.873
3263.27	843.613	706.593
1887.49	3002.66	783.68
2127.22	2605.86	551.8
1503.29	1998.88	1515.69
1328.66	1192.67	759.087
2975.79	2363.44	729.12
1876.53	2719.94	667.74
1223.26	1712.85	555.727
2193.97	1837.89	657.613
1987.51	1152.58	825.22
1692.19	1632.46	862.007
1461.34	1814.95	744.207
2243.99	826.46	884.947
2764.17	966.787	1091.82
1260.25	1888.11	438.753
1834.37	2215.67	523.487
1672.76	1530.37	651.207
1804.2	1145.14	526.38
1657.88	2623.84	2785.25
1751.91	1520.86	985.387
2853.03	1563.85	971.747
2353.52	1322.05	768.387
1384.46	961.207	564.407
3183.91	2530.63	2923.51
2807.77	902.307	591.067
1379.5	1385.29	956.247
2115.44	3950.85	1214.58
1364.21	1365.45	1202.8
2073.07	2691.63	702.253
1281.95	1694.05	2019.34
2754.66	1384.67	437.307
3202.92	1700.66	1085.41
2001.98	920.907	790.087
1350.98	1323.91	713.827
1188.33	1830.24	537.333
2805.91	1868.89	624.133
1655.61	2840.01	688.407
1886.04	1663.87	573.707
2375.01	1880.46	1365.86
2043.73	2388.45	619.793
1936.26	957.073	427.8
1994.75	1080.66	1385.08
1542.35	1674	886.6
907.68	878.127	787.4
1598.57	1868.06	543.947
1883.56	2680.47	1492.34
3982.05	902.72	846.093
1168.91	815.507	1016.18
2400.23	1254.47	752.68
2243.37	1044.08	1645.27
2144.17	1353.87	707.213
1900.09	1077.77	709.28
1416.7	2639.96	2681.91
1457.41	1720.29	1002.33
2483.51	1334.45	919.873
6777.63	849.193	661.127
1746.54	924.627	474.093
2234.69	1008.53	763.633
3374.45	2631.07	1036.43
1480.97	1364.62	828.113
2784.21	1381.98	1054.62
1074.46	2898.91	2308.88
2865.85	1447.49	2012.73
2169.79	1152.79	470.58
2904.29	811.58	646.247
4043.64	2045.79	496
3491.01	1989.79	816.747
2187.98	2670.55	718.787
1211.07	1261.7	667.947
1365.65	3015.89	613.18
1342.51	1283.4	815.507
1566.95	565.647	1391.69
2573.62	1394.79	1024.65
1004.19	1417.94	670.013
1823.21	990.14	1638.87
1968.71	1176.35	673.733
2368.61	1156.51	566.68
958.107	2948.51	1146.59
636.74	3242.19	1260.25
1695.08	1615.51	629.093
1215.82	1493.58	475.953
1421.87	848.367	3149.19
1209.62	1688.47	482.567
2026.16	899	405.893
2624.87	2079.48	1133.77
1692.81	1619.65	395.973
2178.47	781.407	835.553
2301.85	1573.77	623.927
3345.73	908.093	755.573
1453.49	1065.78	1488.41
2208.85	2678.61	643.353
1278.85	1635.15	615.66
2564.32	2029.47	889.08
1307.37	1891.62	785.953
1584.72	998.82	1189.78
1159.4	1793.25	1170.35
2502.94	1375.16	525.14
1206.52	1154.23	648.933
922.56	1300.14	865.727
1872.61	1019.9	708.453
2285.73	1839.13	547.667
1845.74	1658.09	929.793
1881.08	1254.88	2463.88
2179.92	850.02	631.78
2382.45	2425.23	782.853
1595.26	1110.63	957.487
1299.52	662.573	787.193
1732.49	968.027	458.18
1744.47	672.7	363.113
1107.11	1430.34	701.84
2644.92	1576.25	361.667
1660.77	880.4	1286.5
1687.23	1797.59	997.373
2100.77	4371.21	440.407
926.9	2579.2	424.08
1250.33	1177.38	827.907
1620.47	1178.83	468.307
1610.76	1441.5	698.533
1293.32	1609.11	1950.93
2475.04	1188.95	1104.43
1313.16	842.787	729.12
1602.29	879.16	671.46
1502.26	1563.23	966.373
1528.09	833.9	702.253
1036.23	3187.63	991.587
3088.63	1481.18	821.913
1457.41	1326.18	697.913
1748.19	1044.49	482.773
4359.43	2151.61	1060.61
3090.29	1512.8	749.58
1608.69	1666.35	805.38
2468.63	1455.35	1262.32
2036.7	3663.99	1171.39
2322.93	957.28	1415.67
2770.99	2309.29	751.647
1844.71	671.253	496.207
1782.71	1691.15	557.587
1559.71	1520.45	690.267
3199.61	1280.51	831.213
1064.95	1114.55	552.42
2740.4	1156.3	1464.23
1338.58	2449	611.32
1815.15	3528.01	682.62
1455.76	987.453	1097.81
1851.94	1461.75	679.107
1447.49	3585.87	413.54
1018.25	1967.88	483.393
1687.02	1257.98	718.787
1384.25	1085.83	699.567
2559.57	1122.82	601.193
1136.67	1250.33	514.393
3004.93	2836.09	943.227
2020.79	1201.35	833.28
1523.13	4486.73	934.547
2080.72	1476.84	524.107
2979.1	2137.76	432.967
2275.19	851.467	1251.16
926.28	1244.34	919.253
3201.06	887.633	534.233
2279.74	3059.29	572.673
1465.27	2505.01	984.353
1579.76	1339.82	645.42
2392.37	1892.24	1373.92
1853.18	3390.99	462.52
1377.23	1961.68	660.713
4172.19	1330.52	1968.71
2309.5	1508.25	1913.32
2609.17	1279.06	603.467
1205.69	903.753	798.147
1384.05	2608.96	489.8
1986.89	1042.22	1065.16
1440.67	977.533	1260.05
2017.69	2377.49	1244.96
1788.91	1608.28	1520.24
1968.29	1111.45	822.947
2108.62	2534.56	1246.82
1205.49	2453.13	601.4
1733.73	1215.41	801.453
2311.98	1889.14	1173.45
1998.47	1319.98	1187.09
1476.22	1073.43	545.187
2349.39	3121.91	805.587
2267.75	1513.83	870.067
5523.99	1920.35	694.607
1821.15	1054.62	1030.85
1507.84	891.767	797.32
4403.03	1897.41	459.213
2826.37	956.453	797.32
3032.83	1162.29	732.013
2302.27	1870.33	541.053
2000.53	1919.31	500.34
1930.47	825.633	515.84
2657.73	1311.92	2943.35
1724.22	2134.25	1113.31
925.66	992	799.593
4119.49	1151.55	979.187
1289.19	2323.55	723.953
4520.01	1489.65	659.06
1454.11	1463.2	889.7
844.647	1667.39	1483.87
1366.48	953.767	723.54
2628.59	1456.79	638.807
1902.16	1240.62	726.02
3895.46	2037.32	934.547
1815.77	2346.91	593.753
1243.72	1076.94	1328.66
2753.63	882.053	715.273
1653.13	2396.71	860.56
2148.92	2123.91	804.553
2016.45	3185.97	462.107
1123.85	1659.33	1409.67
5706.48	1436.54	568.333
1958.58	827.907	404.24
2396.71	870.273	452.807
1743.03	1525.82	646.247
1335.89	2758.59	1908.57
1348.91	6211.16	912.227
828.32	1612.83	585.693
1977.59	1286.5	679.313
2960.5	1850.29	1104.43
1521.27	1807.71	680.14
2730.07	2503.35	1090.17
2717.05	1112.28	685.927
2519.06	1314.61	947.153
1865.37	1973.05	1388.8
1482.21	2091.05	511.5
1889.76	1569.84	558.207
1778.57	1396.24	714.86
2049.51	1861.45	1277.2
1702.31	1709.96	546.633
3994.87	1233.18	847.953
2041.04	1185.23	1832.1
1629.77	1525.2	537.127
2227.25	981.047	497.033
1756.05	1982.35	1244.75
1877.98	2453.96	449.707
3746.45	1191.02	939.507
2210.71	2097.87	626.2
1351.39	1214.79	684.273
1322.25	2756.52	728.707
4702.08	4500.37	887.84
4433.62	1327.42	830.593
2234.07	2369.43	627.233
3093.39	1539.87	884.327
2169.59	1015.77	540.433
2702.17	1331.97	394.113
1967.05	2609.17	419.533
944.88	706.387	1075.7
994.687	1264.8	1596.29
1813.29	1566.33	888.46
1829.41	2199.35	597.06
970.713	2155.74	363.94
1181.1	1777.13	1116.83
6275.02	1983.59	555.107
3171.51	1424.14	824.807
1080.87	1772.17	441.44
2507.49	4593.17	1425.59
4289.99	1525.2	1609.11
1022.79	1635.77	627.44
1133.15	1822.59	582.8
2205.75	1012.25	1160.85
1510.94	1394.38	2099.73
959.967	1273.07	1007.29
2040.21	3401.32	783.68
1527.06	1577.28	1754.6
958.727	989.52	1171.59
1721.74	1145.55	435.653
1935.85	713.413	1151.96
2587.67	1371.85	1214.37
1356.97	1930.06	710.727
2501.91	5152.41	2368.81
2221.25	1002.33	631.78
4997.61	1700.25	839.687
1573.97	1420.83	558
1080.66	1752.95	970.507
1340.44	988.487	691.507
1154.85	4569.19	920.7
2257.42	2126.19	685.927
1550	1823.42	583.007
1273.27	1584.1	542.707
2393.82	1627.91	1169.32
1882.11	2496.33	489.18
1808.95	2703.2	923.18
790.913	1660.15	653.893
2522.57	1772.58	823.36
2029.05	1396.65	1292.91
1672.76	922.973	665.053
2549.65	1757.29	778.72
2111.51	1891	615.04
930.207	1974.29	3485.64
2841.05	1715.33	983.527
1301.17	893.833	460.453
2948.31	1121.37	661.54
1716.16	2361.99	834.313
1871.37	1620.68	872.34
1033.33	1942.67	652.653
1430.55	900.447	405.067
3373.83	1076.32	743.173
1774.65	1644.45	1424.55
1707.89	1545.45	1090.37
3301.5	1705	821.293
1553.51	1546.28	687.787
2939.01	1022.59	908.3
4981.08	1780.64	752.887
1651.27	2040.21	1018.25
1299.52	1718.02	678.073
2127.01	1624.81	1437.16
1367.1	2301.65	760.533
2210.92	1790.35	858.7
2222.7	1554.55	647.9
3501.76	1575.63	951.493
2125.57	754.747	737.387
2030.29	1079.63	714.653
1156.09	1817.84	1218.51
1955.69	1398.1	513.567
1962.3	2153.47	642.527
665.88	1548.35	949.633
1766.38	2761.89	693.987
1127.16	1789.32	1005.85
4145.11	3272.36	806.827
1573.15	829.147	1089.75
2387.62	1645.48	1539.05
1553.93	721.887	1115.17
1067.64	2490.75	1223.88
1378.05	1563.43	904.58
1930.27	4573.33	657.613
2291.52	1989.37	1595.47
1602.29	3334.57	913.467
2080.72	1101.12	682.62
2764.37	1924.07	806.827
2521.95	1723.39	768.387
1128.4	1400.99	1139.97
2081.34	1887.28	255.853
3053.71	1039.33	820.26
1490.27	1357.39	670.633
1438.81	2174.75	590.86
2713.74	1883.35	529.687
1590.92	1135.43	1257.36
1247.44	1298.9	608.22
2047.45	5176.38	908.92
3668.13	944.053	874.613
1590.09	1566.95	584.247
986.627	1537.39	829.767
3349.03	770.867	768.387
1428.89	1110.42	904.167
1325.77	1789.11	791.533
2781.53	1689.09	1028.37
2888.37	2030.71	708.867
2282.63	3034.69	540.64
2395.47	882.467	711.967
2996.05	2052.2	493.933
1791.8	1384.46	983.94
2156.15	1657.47	420.36
1996.19	1669.87	624.34
5557.89	1381.98	911.4
6749.11	2030.5	558.207
1653.75	2245.85	700.187
1622.13	1389.21	590.033
1795.52	763.22	1275.75
1421.87	661.953	1305.31
1711.41	840.1	635.293
2114.2	823.36	941.573
1528.3	3887.81	315.58
2325.62	1577.07	916.567
2125.36	1358.42	918.22
2361.37	2283.67	848.16
1527.27	1511.35	888.46
1506.19	990.76	1585.75
1400.99	2630.66	814.887
6084.06	1357.39	873.373
2625.7	1261.49	1212.31
1547.52	842.993	1282.16
1539.87	1595.26	563.787
1402.44	2704.44	541.673
2101.59	1997.85	1396.45
1195.57	2473.8	1034.78
1648.37	1761.83	597.473
960.793	1886.04	521.213
2847.87	671.667	1213.34
1998.05	2589.95	1483.87
1546.69	1797.59	442.267
1617.17	1154.03	429.247
1678.96	850.433	612.56
1386.73	877.92	534.027
2724.07	1531.4	1277.41
2608.13	1670.9	792.773
1799.86	2003.22	601.4
1558.68	1424.14	516.047
1507.43	1744.06	651.827
1249.92	1124.47	697.707
3618.94	1416.49	370.14
3457.95	1052.97	667.12
1896.37	3012.79	827.7
1125.92	1606.01	548.7
2405.6	815.713	602.433
1115.59	1647.75	1909.19
1601.67	2389.48	1038.71
1118.27	1648.79	677.66
2786.49	1198.87	1156.3
2933.22	1733.52	622.273
1746.33	1752.53	721.473
2161.73	1434.27	729.74
1499.99	2050.55	970.507
1839.95	1161.05	1276.99
1439.85	1193.91	968.44
797.527	2259.9	355.467
1264.39	2074.52	566.267
2718.49	3377.55	805.587
2406.22	1080.04	571.02
2047.03	2072.25	661.747
1920.14	2995.22	768.387
2214.85	1030.44	785.54
941.987	2694.31	1495.65
2066.05	1634.53	823.98
1398.31	1583.48	630.747
1685.57	1411.12	520.8
1763.07	2123.09	637.36
1464.44	1281.33	887.633
1818.87	796.287	1139.97
2831.95	1496.47	534.233
4566.09	1185.23	449.913
1395	3793.16	597.887
1699.01	2086.3	811.58
3367.01	1304.89	987.453
1133.57	2125.36	460.04
2304.75	1282.57	1106.49
1246.2	1918.07	3254.17
1107.73	1636.18	2526.91
1228.01	1865.58	1259.22
1789.32	2334.71	797.94
3759.89	1820.73	685.307
1430.13	4766.15	1198.25
1006.05	2888.58	1285.67
1327.01	1208.79	662.78
1302.41	1899.47	513.98
1999.5	2143.55	641.08
3555.91	2479.38	710.52
1678.34	1644.03	695.02
2030.91	1904.23	212.453
1720.71	2458.71	752.473
1540.91	1360.9	895.9
2839.6	1150.93	969.06
2167.31	1386.32	845.473
1462.17	883.5	589.62
1369.58	1423.52	736.147
2581.89	3373.42	1106.91
1396.65	1364.21	1084.17
1010.39	2786.28	1027.75
1390.25	1460.93	891.767
1405.33	1730.42	1155.68
1147.21	1604.56	523.693
975.053	1619.23	863.247
1257.15	1313.16	544.36
1991.65	2355.59	408.58
1683.71	1706.86	656.993
2516.58	2255.56	1216.03
1556.2	1588.23	1395.62
1460.51	2664.14	940.127
2759.62	1597.12	1192.67
2062.12	802.487	983.113
1240	1386.11	802.9
2153.47	2224.56	954.593
2063.57	2378.73	1191.85
1875.71	1312.54	1278.85
2070.8	1687.02	616.28
2770.57	1813.71	755.367
2515.75	1812.67	754.953
4170.12	2197.07	1026.31
1458.24	895.487	747.1
856.427	1493.37	825.013
1227.19	1349.12	830.18
1318.53	1432.2	691.92
2060.05	880.4	879.987
1777.95	2497.15	393.7
3111.16	2579.2	801.453
1834.99	1331.76	838.033
1687.02	754.953	824.393
1078.39	884.327	678.693
1074.67	708.453	863.867
3511.27	663.193	656.787
1170.77	1171.39	501.787
1652.92	2426.89	877.507
1481.39	1068.88	1976.56
1273.69	1347.88	788.847
3028.29	894.867	1164.98
2322.31	2517.41	1557.23
2148.3	1006.26	579.907
1796.14	1428.69	765.08
3197.13	2570.73	563.373
1265.83	2191.49	542.5
1819.29	1057.72	1276.99
1231.11	3271.95	642.527
1852.77	1383.22	1113.73
2750.32	457.56	701.427
1085.41	1420.42	637.36
2048.89	1640.93	495.793
1887.49	1871.37	695.227
1143.49	911.193	1475.6
1524.37	1538.43	836.38
2063.98	1327.21	524.52
2280.77	1656.23	815.093
1755.84	605.533	661.333
1394.17	1601.05	738.627
2609.17	1004.61	700.393
2851.38	866.76	504.887
1310.27	1780.85	994.687
5867.89	1671.93	596.44
1436.33	659.06	1262.73
1148.03	2451.69	1234.21
2090.23	2018.72	609.667
1989.17	1212.1	1431.17
2207.82	1187.71	801.66
2121.64	1021.35	1043.87
1078.59	732.427	486.7
1665.32	969.887	888.047
1761.21	1348.71	1044.29
2065.43	1975.73	961.62
1213.34	1778.16	1933.37
764.253	3054.53	663.813
1767.62	1491.1	740.28
2040.42	1079.21	782.853
2837.53	1012.05	905.82
1169.11	1714.92	435.86
990.76	1072.39	401.967
2339.47	1155.47	1471.88
2701.13	1137.29	503.027
2090.43	1672.97	453.84
1343.75	2644.92	787.4
1707.89	961.207	976.707
1232.56	1130.05	724.367
2205.13	2267.96	1110.63
2149.75	1322.05	821.293
2339.67	1477.25	1103.19
1578.11	1055.45	327.773
1383.43	788.02	1587.61
2470.08	1565.5	561.513
1334.24	822.327	511.913
1860.21	1227.39	883.5
1595.88	1525.2	931.653
4778.34	1495.44	350.713
1118.48	2778.63	690.267
1390.25	1739.72	586.933
1907.33	1546.9	894.867
1700.45	2666.41	518.527
2542.62	1719.67	1182.55
1823.01	2303.3	1037.26
2103.25	2225.39	797.733
1437.57	2198.93	1177.79
1737.45	1120.75	473.473
1603.11	1850.7	812.82
2388.24	2501.91	766.32
1478.08	2086.09	946.12
1647.34	1030.85	1082.93
1020.11	791.12	607.393
1735.59	1889.76	1694.05
1303.24	1574.18	367.867
2162.77	899.413	1136.05
2221.87	2909.66	1094.92
1023	2242.13	482.773
2510.79	743.587	723.54
1794.49	3189.69	1471.05
3111.37	2599.87	600.16
2296.27	1772.58	546.013
1543.39	1226.57	1359.04
1429.93	1279.89	623.307
2787.93	1582.65	734.7
1689.29	1121.99	1329.69
3992.59	1870.54	646.247
2027.81	1492.13	1266.04
3137.61	1201.77	927.107
2198.73	2478.14	630.54
2166.9	2156.57	1224.91
1367.1	1497.3	826.873
1153.2	1226.57	894.453
1710.58	1514.25	1073.63
2911.11	2814.59	904.167
2167.11	3104.96	890.527
1419.39	3063.63	1309.85
632.607	1959.61	1768.65
1485.73	1242.89	1778.37
1679.99	1677.1	1323.7
2071.42	2131.35	437.307
2317.77	1636.59	1137.91
1743.03	747.1	699.567
1968.09	1285.88	521.213
1696.53	1122.61	578.253
1352.84	2702.58	292.847
3177.71	1329.9	901.067
2483.51	1194.33	1007.29
3424.67	903.34	1250.95
2209.89	1161.88	819.847
2030.91	1505.57	816.953
1466.51	1367.51	472.647
1962.92	1664.29	963.48
1211.89	1786.22	735.94
1552.69	1155.27	1330.52
2626.73	1546.69	258.333
1876.53	844.44	854.36
2156.77	1256.33	1003.57
1942.05	1747.57	797.113
4816.57	1909.81	800.213
2625.91	2671.37	865.933
1414.84	1722.98	661.54
3041.51	2106.76	1179.45
1266.04	2005.7	2085.06
1708.93	3315.97	1619.85
1105.87	2687.08	431.933
2585.61	873.373	394.94
3119.84	2729.86	641.08
1582.65	2885.07	707.42
779.34	1488.62	861.8
2396.3	1170.15	685.1
1257.77	1360.69	524.107
2657.32	1610.55	933.927
1644.65	1164.77	538.573
2896.23	1225.33	907.267
1745.3	777.687	609.873
935.58	1725.25	1337.75
1539.87	2792.89	684.687
2223.53	1687.64	798.353
1800.07	822.533	407.753
1631.84	1268.31	717.547
2744.74	1249.92	1532.43
1957.75	1872.61	1168.7
1695.29	1504.12	955.213
1652.71	2286.97	650.38
2795.99	2012.11	1654.78
1351.39	1324.94	825.22
1477.25	1062.06	816.127
2166.9	1447.91	717.34
2140.45	1015.97	1378.26
1862.27	3048.54	755.16
2627.15	1083.97	667.12
1378.26	1915.18	949.84
871.1	1405.95	402.587
1450.59	1430.55	574.327
851.673	834.933	1030.23
2064.81	4617.14	799.593
839.067	1099.67	701.22
1976.35	1547.73	586.107
2756.73	1448.11	1360.9
4045.09	1522.1	850.847
1610.55	3209.33	737.18
2702.58	896.727	1069.29
1866.2	2399.19	1260.46
1391.07	1652.51	706.8
2153.47	594.373	1036.85
1645.89	789.88	571.64
1028.79	1658.29	435.447
1655.61	1852.77	567.92
1477.87	1497.51	1261.91
1234.83	1119.31	1240.62
2121.23	1567.57	1440.05
1417.53	1981.31	676.007
2001.57	1810.81	382.953
1575.83	541.053	1521.89
2961.33	1394.17	748.34
654.72	1027.96	649.14
1564.26	1169.53	711.14
1889.55	3845.24	993.653
985.593	2524.43	467.48
2792.07	1555.17	745.86
2635.41	1942.67	662.573
1658.29	3205.19	670.84
3027.87	2057.99	996.133
1540.08	1549.79	1342.71
2735.03	1279.68	754.747
2223.32	1383.84	433.587
3851.03	979.807	804.14
2997.29	976.913	777.067
1843.88	1148.86	562.34
1070.12	2072.66	679.107
2181.16	1923.24	1010.19
1135.43	2125.98	609.047
2266.31	1212.51	752.68
1122.82	2216.09	1191.23
2513.07	1095.95	1071.98
1568.81	1429.1	817.987
6030.33	895.28	764.047
1342.51	2008.59	628.887
2865.43	887.633	349.68
2055.09	2129.7	628.06
2317.15	2172.89	1027.96
2488.27	1130.67	1619.23
1224.91	2412.42	1360.07
1179.65	1859.17	931.86
1483.87	1105.05	410.44
1094.51	819.02	565.233
2039.18	1919.52	687.993
1799.86	2793.31	723.333
2308.88	1059.58	798.767
1375.57	1032.51	866.76
1431.99	1361.52	496.827
2485.37	746.067	973.607
789.053	1704.59	468.72
4027.11	1393.55	435.447
1978.42	1405.13	1319.57
3014.23	2186.74	951.493
1562.61	1913.32	850.64
1744.06	1695.29	937.647
1124.27	2598.01	1066.61
1417.53	1705.83	618.967
1628.33	2371.29	856.22
2520.51	1584.51	799.593
1519	2198.11	2285.53
4410.27	931.653	612.147
1737.86	1079.42	1086.45
1954.86	3667.3	686.96
1933.78	1424.97	597.887
1683.09	1231.73	432.553
1398.93	1936.26	887.633
3570.37	1531.19	1794.49
873.167	659.06	2034.22
1560.75	1957.34	666.707
1473.12	1953	726.433
1508.46	1733.93	981.047
3375.9	900.447	2480.41
1537.39	2484.75	1208.59
1025.89	1890.59	868.827
1356.15	3291.58	836.38
1574.8	1515.49	486.287
3224.41	795.873	597.473
1449.35	890.733	989.52
1672.97	1460.31	1184.61
2852	1508.25	899.207
1630.81	2304.13	1087.27
1544.01	2347.73	1566.33
2626.94	1830.86	738.007
3008.65	2000.95	835.553
3313.69	980.84	493.933
2079.69	1163.95	1206.93
4126.93	722.507	911.607
2156.77	1467.33	1134.19
1638.04	1649.41	375.513
2326.86	1705.83	1033.95
2206.99	1454.11	1337.75
1369.79	1413.6	778.513
2214.02	1270.38	940.747
1031.47	1299.93	864.073
1338.17	680.967	1367.31
1984.21	1913.73	591.48
2056.75	1518.17	2070.8
1610.97	1493.58	812.407
1505.98	1884.18	579.493
1910.01	1948.25	380.887
1870.54	1178	881.227
1125.71	1220.57	1066.4
1071.77	702.873	780.167
1580.79	4054.39	817.78
1125.92	1004.19	1690.95
3010.51	1008.74	953.56
2871.43	1582.24	428.007
1775.06	1508.25	632.607
1476.43	3420.95	705.147
2252.67	833.073	685.72
2831.13	2942.93	867.793
2070.59	1832.51	529.273
1956.1	1447.49	999.647
1622.13	1702.52	1162.09
3625.14	1647.96	888.873
2833.61	1656.23	725.193
3360.61	1589.89	971.54
1894.72	1615.51	609.873
1364.62	2361.58	501.373
2255.35	2430.4	435.033
2856.96	2503.15	1631.22
3011.34	1229.25	1577.28
7259.99	1229.87	547.667
1143.07	1099.47	368.073
819.433	953.973	675.387
863.247	1073.84	1126.75
1254.88	1593.4	975.673
4401.17	2245.23	767.767
1165.81	915.947	587.76
1772.17	1756.46	1277.61
2222.08	879.78	704.733
2108.83	1031.47	1105.25
1382.39	1599.6	1058.13
3076.03	1153.82	921.733
1599.81	1253.23	412.093
1827.76	2390.93	939.92
3884.09	1865.99	1662.43
1943.7	2330.37	1402.85
1437.99	1872.19	710.933
1862.89	1688.67	837.827
1481.8	1226.98	1273.48
1431.58	1758.32	420.773
1492.34	1694.05	463.967
2888.79	2380.39	1667.59
1382.39	1584.1	666.913
2157.19	1897.61	506.54
3954.15	1731.87	507.367
2824.72	1209	576.393
1206.93	826.253	879.16
1566.53	823.567	1404.71
1968.71	1658.71	351.953
1453.07	1774.03	1897.41
1721.95	2702.79	731.187
2140.45	1356.77	819.64
1545.87	2220.63	286.027
4715.51	1013.7	926.28
2126.39	1840.16	629.713
1981.11	1052.35	1483.25
2129.91	1087.89	381.713
1805.44	1898.03	474.92
4298.87	3391.81	483.393
1147.41	1599.39	806.827
1686.4	1733.93	571.02
1830.24	1982.97	863.66
2423.17	1911.67	1210.86
592.927	2818.73	1044.08
2297.72	1640.93	621.86
3072.51	2367.99	954.18
4168.47	709.073	1210.03
935.993	2753.21	759.293
1554.13	916.36	900.033
2610.82	1300.35	1291.87
1706.45	2888.58	514.807
1740.55	1331.35	484.84
1390.04	1064.75	1411.53
1489.65	1085.62	682
1225.12	1232.56	953.973
2759.83	2366.95	1019.49
1731.87	1449.56	989.313
1919.73	3102.69	265.36
1289.6	1734.35	529.067
2215.67	1179.24	824.393
2502.73	424.907	1189.37
2758.79	1118.89	784.3
1458.03	1523.34	906.853
1689.91	1596.29	689.027
1374.33	2088.57	1267.9
691.713	1312.54	447.64
1268.11	1391.07	701.013
1840.16	749.787	1136.25
2300.41	1767.83	507.16
1869.3	733.667	694.607
2430.61	1176.97	675.593
1170.97	1359.66	823.153
1430.34	2715.19	540.227
1928.61	1380.53	1164.98
1610.14	1226.98	774.38
2735.85	1318.33	727.467
1980.07	903.96	865.933
1381.77	1655.61	816.747
2105.93	3122.53	556.14
1968.91	1184.61	1152.17
4936.85	924.627	592.927
1651.06	4153.59	735.113
2453.34	2650.91	824.393
1226.36	1358.21	628.267
2329.55	2537.25	483.807
3215.53	1062.89	1567.36
1464.03	1391.69	747.513
1706.86	1478.49	776.24
1342.51	1725.67	912.227
747.513	1506.19	1170.56
2682.33	2215.47	1019.69
2012.93	2078.03	530.513
2141.48	889.493	921.94
1823.83	1601.46	632.193
2987.16	2637.48	1483.66
2766.44	1533.67	602.02
2952.65	1438.19	586.52
1818.67	2025.75	492.693
2353.31	1202.39	683.24
2333.68	1732.9	315.787
2072.87	1120.34	616.28
1378.05	646.247	730.773
1628.74	1827.55	1042.63
3258.51	940.747	1031.68
1673.79	1027.55	473.68
2626.53	961.62	822.74
2758.79	1508.67	733.667
2772.64	1447.91	694.607
2381.01	1309.23	1175.73
3158.28	1884.59	811.993
1868.68	3351.72	502.2
2980.96	996.547	897.967
2838.77	2246.05	1076.53
2083.82	1928.82	707.213
1734.14	1915.8	963.273
1726.7	2217.12	562.34
1834.37	2017.07	844.233
1366.89	990.967	362.287
1753.57	1794.07	1525.61
1927.37	3279.39	664.433
1878.81	1032.09	871.927
3522.22	4107.91	810.547
3126.45	1363.17	465.413
1933.99	1414.01	1353.05
1344.99	1266.87	647.693
1637.01	1044.7	703.907
1318.95	1387.77	566.06
2193.56	1168.49	704.32
1631.63	3277.94	1231.11
1625.23	2095.81	669.187
1501.43	1007.91	1174.07
1621.71	1920.55	490.213
1521.69	1224.5	933.513
3249.21	1904.64	862.833
1870.33	1251.16	825.84
1235.45	1273.27	1532.43
1072.81	2802.4	745.447
1385.91	1171.39	685.927
1960.65	3007.83	949.84
2095.6	908.3	1116
1125.51	987.66	2016.65
1968.5	1341.68	800.42
1457.21	1105.25	579.287
1254.67	2010.04	682.413
1414.43	1555.58	1203.42
1966.43	1547.93	1264.8
2520.71	1446.87	1600.84
1496.68	1080.87	663.4
1625.43	3376.31	796.08
1095.54	1277.61	601.193
3191.14	1493.79	743.173
2349.18	1854.83	517.08
2261.55	3720	574.327
2019.13	1386.94	1370.2
1282.57	1245.99	598.92
2398.16	738.42	1631.22
1025.89	1079.83	945.707
938.267	605.327	737.18
1620.27	1135.01	674.353
2489.51	898.173	900.033
1419.8	1329.49	528.033
2668.07	869.86	643.56
2258.45	1515.9	655.133
2094.77	2167.31	953.973
1519.41	910.78	617.933
2217.74	836.38	406.1
1535.12	1512.8	1129.02
1220.78	1622.13	687.993
2086.92	1668.21	467.48
1184.2	2141.69	870.273
2838.57	3208.91	497.653
2104.07	1586.99	291.607
1664.7	1273.27	390.393
1531.61	2200.17	904.993
1185.65	1821.56	1217.47
2368.19	2208.44	1050.69
4624.79	1125.3	959.553
1620.68	1395.83	1034.78
1663.05	1597.12	1285.88
1626.47	1082.52	620.413
4690.71	1479.53	924.213
1276.99	1200.53	717.547
2098.29	1161.26	432.967
2430.19	627.647	574.74
1166.22	2123.91	620.207
2376.67	2234.89	606.153
879.78	1776.71	2104.49
1595.67	1021.97	1158.99
1237.52	1839.75	912.847
1658.71	1499.16	1032.3
931.653	1831.48	585.693
2278.5	2083.41	661.54
2891.89	1077.56	773.553
1557.85	930	895.487
2006.73	1366.07	1121.99
1154.65	980.633	1042.22
1211.69	2101.8	615.867
1277.82	1457.62	678.693
1739.51	1678.13	1026.31
1234.01	1952.38	469.547
1878.81	2875.35	581.147
3397.6	724.987	927.52
1194.12	1045.32	669.6
1828.59	1667.39	1289.6
2348.97	2373.15	1042.22
1545.04	3001.01	775.62
1075.08	1529.75	1095.75
975.673	767.973	529.893
3384.58	1091.2	413.127
1086.24	1136.67	625.993
1351.19	1443.77	1072.39
1078.39	2877.42	856.013
2058.19	1480.15	669.187
3223.79	1350.98	683.24
2133.42	2496.33	1330.11
2959.67	1157.54	955.42
1683.92	1132.95	886.807
5089.37	736.767	603.053
2694.52	1563.23	671.46
2224.56	1154.85	869.653
1180.69	695.847	340.38
2000.95	1472.91	789.26
1554.34	3041.93	318.267
1937.5	1039.33	625.58
2006.73	1057.93	578.46
1763.07	864.073	2121.23
1632.87	1793.87	561.927
2084.65	2841.05	518.113
1273.27	1353.67	2318.59
1866.82	1285.67	634.467
2392.99	2566.8	920.493
1635.77	4302.8	1105.46
1662.63	690.06	577.22
1379.71	871.1	753.713
2085.06	1227.81	707.213
1552.48	1072.81	1046.15
2039.59	1754.6	818.607
2091.05	998.82	689.853
2246.26	1053.38	901.48
2535.39	1063.92	1218.09
1795.93	3651.39	906.233
1827.55	1042.43	609.667
1468.37	1548.76	318.267
1346.23	1451.42	614.42
2022.44	1025.27	1948.87
1638.45	4551.63	2855.72
1589.47	1524.99	628.473
1735.79	822.327	914.5
1985.86	1443.98	840.1
1620.27	1052.76	1950.11
2992.95	1190.19	729.12
2893.75	1693.22	1280.09
2643.27	1869.71	1610.97
1550	1309.23	1009.36
2739.99	874.82	776.447
2695.35	2261.97	1767.83
1877.15	1970.77	652.033
1159.19	1239.79	671.873
1763.28	1377.64	534.44
1958.79	1345.4	743.173
2436.81	1420.01	446.193
3343.66	1658.09	878.953
1612.83	1567.36	714.653
2328.93	1536.98	857.253
2067.08	1310.68	817.367
988.693	1977.39	705.56
1613.65	1161.67	830.18
1980.9	1210.65	1052.35
2744.12	5184.65	1693.01
1573.56	1635.56	888.667
2076.79	976.913	872.753
2247.5	2146.03	800.627
2235.51	917.393	654.72
1843.05	823.98	1309.44
1706.86	1782.91	752.473
2392.99	1607.25	1733.11
1578.52	2135.69	1354.49
3132.86	1923.03	1027.55
1341.27	837.62	616.073
2248.12	1107.73	1446.87
1204.87	991.587	1382.6
1502.26	2172.27	1355.53
1113.31	1177.17	879.367
1302	1301.79	368.28
1352.22	975.673	1055.03
3064.45	1401.82	1022.79
2557.5	1106.08	924.833
1515.49	2430.61	745.24
1936.88	1858.76	702.46
1346.02	1205.28	1264.8
990.553	4961.45	892.593
2686.67	1280.71	669.6
3173.37	1534.29	1700.87
3440.38	2145.61	968.853
1186.47	1235.66	456.94
1567.15	2215.05	688.613
2435.98	1142.66	1155.68
3258.31	1131.71	1243.1
1665.32	1360.28	463.347
864.9	1703.97	1014.94
2438.05	1441.71	456.94
1155.06	1513.63	726.433
2465.95	872.96	1546.49
1616.13	1969.33	1284.64
1821.15	1641.35	1211.48
1548.14	1893.27	985.18
2496.74	1445.01	767.767
2864.19	1197.22	509.64
5698.21	952.527	1018.66
1758.32	1347.05	927.313
3126.66	1258.6	745.033
1247.85	1629.77	489.18
1980.49	1413.6	414.78
3474.69	2803.23	855.187
1120.75	3513.54	1081.69
1276.58	700.393	1501.85
1095.95	3810.52	938.473
1105.25	1228.63	1479.73
1632.46	3684.45	396.18
987.04	1451.01	669.393
3770.01	2992.12	584.66
2626.11	1515.28	607.6
1264.39	1997.64	884.12
1540.49	2005.7	670.013
2418.21	1454.73	1371.65
2345.46	1357.39	925.04
2619.5	2276.43	1205.9
1528.92	665.673	936.2
1985.03	1384.67	564.2
3081.19	1694.67	1575.01
1342.71	1868.47	734.08
2091.88	3353.99	416.227
1678.96	521.213	843.407
1445.01	1985.45	548.493
3934.31	789.053	556.14
1026.51	1248.06	525.76
2814.8	2404.15	527.827
1358.01	2590.57	1008.33
1684.54	1294.15	742.14
1707.69	1039.95	840.307
1361.73	1330.52	1379.29
1378.26	2304.95	821.087
1744.47	1063.92	938.68
3232.06	1117.86	1048.42
1328.87	3632.79	885.567
1151.96	1693.43	630.747
2500.05	2167.93	634.26
2972.69	1584.31	655.34
965.34	1696.73	314.547
2757.55	3693.13	699.36
1770.93	6145.23	866.347
1582.24	2360.34	709.693
1356.35	1154.23	518.527
1249.09	1147.41	1122.82
1727.73	1333.83	696.053
1955.07	1348.09	1002.95
1769.69	1685.99	691.507
1581.83	3541.85	849.4
1624.19	3031.39	635.707
1452.87	757.847	848.573
1687.02	1118.69	314.753
1916.83	4069.47	528.653
1769.69	1229.67	1168.08
2334.51	2222.7	515.427
2241.51	1374.33	1579.76
1189.37	1124.89	1385.49
1195.77	2135.49	589.207
2488.27	908.3	674.353
2030.5	2121.64	692.747
5341.92	699.36	675.18
831.007	2400.85	419.12
903.34	3427.98	767.767
1112.69	878.127	1027.55
1432.61	1873.64	451.98
908.713	2245.02	710.52
1472.5	1987.72	896.107
1941.84	2083.82	1442.12
1431.58	1966.02	1722.77
2154.29	1609.31	1130.05
1994.54	1725.05	1245.17
2220.01	1272.45	505.713
1073.84	1906.09	755.573
1215.2	1139.15	786.78
1924.07	1952.79	1012.25
1581.41	895.9	756.813
5684.99	898.38	990.347
1424.14	1404.3	550.56
2719.32	1305.72	1562.81
2773.47	1687.64	578.46
696.26	1829	1530.99
1819.91	1654.99	932.893
1878.6	2015.41	289.747
1687.43	1141.42	930.827
2146.03	1871.16	600.987
1816.19	1671.52	1036.23
1754.39	2018.72	892.387
2085.06	1344.57	610.907
1361.73	1530.16	514.393
2014.38	1521.27	1341.06
1893.07	1112.9	763.84
1710.58	1132.12	649.14
2670.34	1215.82	1020.73
2016.03	1567.57	1216.65
1311.71	1298.49	726.847
2265.07	536.3	396.387
1314.81	2111.31	921.527
2332.03	1021.35	907.267
2203.27	2246.05	1036.64
1517.14	1567.77	525.14
1765.14	1653.54	898.173
1309.03	1632.87	474.713
1441.5	1232.35	678.487
4220.75	3388.92	934.133
1039.12	1198.87	1516.52
1793.45	1320.81	1166.63
828.733	1873.64	938.68
1283.19	2948.1	1340.65
1108.35	1137.7	543.74
1109.59	1514.25	944.26
1039.53	2075.14	859.94
2081.75	2104.28	650.173
2637.89	1238.76	680.967
1736.62	1463.61	558.207
2144.17	1384.67	949.427
1475.81	1120.96	1858.76
2897.67	1770.51	594.993
1344.99	660.713	461.28
915.533	1561.37	720.44
1198.05	3491.43	1044.91
2269.61	3351.31	1120.13
2686.25	1708.93	521.007
1419.39	1881.08	1683.51
2104.9	1246.61	852.707
2973.73	1044.08	986.833
1818.25	2507.49	521.007
2448.79	1553.51	403.207
1888.52	1968.5	1219.75
1722.98	1480.97	840.927
1074.25	1842.43	750.407
1830.24	1530.78	484.633
2149.33	2259.07	954.8
1451.63	1838.92	489.8
973.193	1582.86	462.727
1036.64	1120.34	1159.19
2083.82	960.587	992.827
1742.61	1570.05	589.62
1054.83	1349.12	605.12
1447.7	3935.55	682
1707.89	1786.01	857.253
1707.48	1108.35	1029.2
925.04	1213.96	398.867
1966.43	991.793	853.12
1853.18	2586.64	886.393
4801.28	1448.11	934.34
2820.79	1399.55	1869.3
1341.47	1438.19	651.413
1434.68	2490.33	513.153
1884.59	1306.75	692.127
1139.15	6212.4	618.14
1443.36	1886.45	870.893
1708.31	2247.09	617.52
1693.43	961.62	717.34
1434.06	1465.68	3023.53
2247.91	710.727	582.387
946.327	1885.63	798.56
3332.71	1232.97	787.813
1821.97	3626.17	581.147
2151.61	972.16	617.933
958.313	1754.81	551.387
1670.9	1469.19	1396.45
892.593	1819.49	1680.2
1989.37	1937.09	989.313
1928.2	1130.88	526.173
2506.87	1189.78	418.5
2195.63	1367.31	1815.98
1572.11	1077.15	841.34
2787.11	2382.25	1051.31
3126.66	1383.01	690.267
1698.8	1251.16	822.12
1285.88	2387.41	1267.28
907.887	3536.48	650.38
1343.54	1336.1	855.393
1583.89	1095.54	677.04
2100.35	1083.76	1294.77
1827.14	2213.19	975.26
1241.65	1039.33	857.46
2035.46	1944.73	829.973
2085.89	2392.58	513.98
1503.5	5938.36	586.313
2198.93	875.233	1130.67
1866.41	1693.43	1230.08
1578.31	2474.83	1035.4
2658.56	1059.17	1226.57
2418.83	1154.65	322.4
3288.69	1294.77	766.94
1608.28	959.347	651.827
1794.9	1114.76	807.653
2127.43	1960.85	397.833
2309.91	2046.21	968.44
1764.31	646.04	831.833
1670.69	1610.14	1108.56
1834.58	2068.11	888.667
2543.24	1741.17	1401.41
1540.91	950.46	611.733
5937.74	1782.71	1904.23
1394.79	2474.42	575.153
1777.95	1974.29	1488.41
3263.06	785.747	490.213
2322.11	1492.34	1001.51
1846.36	1587.41	276.727
1368.75	1705	969.06
1037.88	1558.89	809.927
2975.38	1479.53	815.3
1692.39	2448.38	872.133
2188.6	1791.59	1301.59
1662.22	1453.07	639.013
1691.15	1596.09	1030.85
1843.26	2143.13	1999.09
2195.21	1497.51	452.187
1550.83	1654.16	641.287
1092.44	1245.17	568.54
2992.12	1604.35	762.393
3362.67	2586.85	1017.63
1203.63	1587.2	805.173
2090.64	2492.4	496.207
2906.15	1933.99	1284.23
1622.54	1249.3	613.18
1108.77	1419.39	1234.63
1528.09	1674	1353.46
1973.67	2551.09	965.133
2049.93	1268.73	594.58
2409.73	1309.85	917.393
1523.75	1560.75	597.473
1956.72	1155.89	963.48
1750.47	812.613	778.307
2283.87	2500.87	1050.28
3212.84	1721.74	1068.47
[truncated: 18,415 more rows]
