# Supplementary material for: Repurposing the mammalian RNA-binding protein Musashi-1 as an allosteric translation repressor in bacteria
Source: eLife. 2024 Feb 16;12:RP91777. doi: 10.7554/eLife.91777 (PMC10942595; doi:10.7554/eLife.91777)
Supplement: Figure 2—source data 1. [file elife-91777-fig2-data1.xlsx]

## Sheet: fig2b
name	lac 0 mean	lac 1000 mean	lac 0 std	lac 1000 std
wt	163.215	70.6151	30.4461	6.50218
mut1	93.9133	67.4487	5.16824	7.79433
mut2	192.624	125.843	13.3414	24.2668
mut3	142.543	77.8691	8.07968	6.34319
mut4	284.374	120.981	12.9474	22.1583
mut5	178.734	123.444	14.5758	19.2856

## Sheet: fig2d
name	k ON mean	k ON std	k OFF mean	k OFF std
Mut1	2.58921e+07	1.13389	0.040513	1.8126
Mut2	1.06248e+07	1.57634	0.0392292	1.32888
Mut3	7.09089e+06	1.20564	0.0356192	1.18716
Mut4	1.52182e+07	1.08232	0.00951554	1.20449
Mut5	1.17335e+06	1.61942	0.102411	1.65388
wt	1.78601e+07	1.23406	0.0110943	1.11932

## Sheet: fig2e
name	Translation Initiation Rate	gfp mean
wt	6738.91	163.215
mut1	2288.26	93.9133
mut2	1911.28	192.624
mut3	2619.03	142.543
mut4	5628.71	284.374
mut5	7049.12	178.734

## Sheet: fig2f
name	kd mean	fold change mean	kd fold L error	kd fold R error	fold change std
wt	0.618193	2.31133	0.169816	0.23413	0.480823
Mut1	1.56622	1.39237	0.715783	1.31823	0.178215
Mut2	3.69218	1.53068	2.07455	4.73511	0.313629
Mut3	5.02659	1.83054	1.72193	2.61916	0.181663
Mut4	0.620227	2.35056	0.0808807	0.0930096	0.443618
Mut5	87.4428	1.44789	27.3698	39.8397	0.255166
