# Supplementary material for: Repurposing the mammalian RNA-binding protein Musashi-1 as an allosteric translation repressor in bacteria
Source: eLife. 2024 Feb 16;12:RP91777. doi: 10.7554/eLife.91777 (PMC10942595; doi:10.7554/eLife.91777)
Supplement: Figure 3—source data 1. [file elife-91777-fig3-data1.xlsx]

## Sheet: fig3d
time	RFP lac 0	RFP lac 1000
0	0.21298	0.19918
0.249883	0.07288	0.0703825
0.499919	0.0543175	0.061325
0.749947	0.0607225	0.0554575
0.999947	0.10024	0.10224
1.24998	0.1328	0.147375
1.5	0.192295	0.21557
1.75	0.26039	0.25219
2.00006	0.2878	0.29365
2.2501	0.371825	0.375575
2.50008	0.4677	0.4696
2.75012	0.512265	0.527715
3.00013	0.663795	0.694595
3.25014	0.824355	0.864455
3.50017	1.00547	1.07332
3.7502	1.30009	1.35709
4.00022	1.53592	1.58192
4.25086	1.82736	1.87461
4.50087	2.26811	2.22186
4.75091	2.71851	2.68976
5.00078	3.13242	3.10342
5.25081	3.63392	3.48442
5.50066	3.91387	3.83162
5.75069	4.40657	4.28307
6.00071	4.97862	4.81337
6.25073	5.66884	5.64634
6.50077	6.62017	6.39867
6.7508	7.53255	7.11155
7.00082	8.26485	7.8441
7.25083	8.6915	8.23775
7.50085	9.04346	8.62771
7.75088	9.61764	9.12314
8.00089	10.3524	9.63615

## Sheet: fig3e
time	GFP lac 0	GFP lac 1000
0	0.200525	0.190275
0.249892	0.0822	0.084175
0.499925	0.050275	0.053675
0.749947	0.098375	0.088525
0.99995	0.177675	0.171
1.24998	0.2352	0.24025
1.5	0.35425	0.36705
1.75001	0.4633	0.4824
2.00006	0.562525	0.57105
2.25009	0.679025	0.71015
2.50009	0.8468	0.8653
2.75012	1.072	1.08
3.00013	1.3211	1.3161
3.25015	1.697	1.568
3.50018	2.13245	1.84545
3.75021	2.63655	2.17355
4.00023	3.18255	2.4918
4.25058	3.9095	2.87275
4.50053	4.80825	3.37075
4.75057	5.75255	3.8358
5.00054	6.7135	4.25725
5.25057	7.8083	4.73605
5.50057	8.7985	5.151
5.7506	10.1051	5.58385
6.0006	11.5076	6.0971
6.25062	13.0682	6.6727
6.50066	14.799	7.3305
6.75069	16.4985	7.851
7.00071	17.941	8.24875
7.25074	19.0675	8.476
7.50074	20.0165	8.59225
7.75077	21.11	8.7195
8.00078	22.541	8.89075
