# Supplementary material for: Repurposing the mammalian RNA-binding protein Musashi-1 as an allosteric translation repressor in bacteria
Source: eLife. 2024 Feb 16;12:RP91777. doi: 10.7554/eLife.91777 (PMC10942595; doi:10.7554/eLife.91777)
Supplement: Figure 4—source data 1. [file elife-91777-fig4-data1.xlsx]

## Sheet: fig4a
lac 0 mean	lac 1000 mean	lac 0 std	lac 1000 std
747.49	371.77	1.41023	48.7566
100.993	38.4752	28.0357	26.885
341.362	35.4606	18.8095	9.27941

## Sheet: fig4b
gfp mean	gfp std	lac
332.165	7.27603	1
328.218	7.06562	5
330.557	17.1755	10
326.436	4.30703	20
304.486	7.89814	50
137.098	12.0276	100
42.7611	4.60844	200
42.9141	3.67598	500
38.6937	1.73457	1000

## Sheet: fig4c
Lactosa_0	Lactosa_100	Lactosa_1000
1893.8	516.528	393.856
1086.37	1287.38	296.752
1332.8	961.928	362.304
1848.78	743.24	235.688
2058.5	366.792	357.816
1912.7	1017.55	196.112
2116.02	876.112	232.288
1257.18	952.272	447.304
2591.89	412.352	323
4995.69	654.024	220.048
4464.74	792.744	155.856
2147.44	1913.52	197.744
1187.82	499.664	232.424
1735.63	885.768	259.624
3723.68	533.528	205.36
1749.64	866.184	348.84
1464.99	495.856	318.104
3010.63	413.032	308.72
2821.18	507.144	319.6
1305.6	749.088	627.504
3980.72	437.24	242.488
1688.3	881.824	229.024
2238.7	1130.7	276.624
1527.42	869.176	254.184
1338.92	790.16	284.648
905.352	1145.39	264.656
2405.43	548.624	245.752
3798.21	944.248	310.352
767.856	2111.26	302.192
1485.39	1410.05	272.68
3151.12	562.224	524.96
1801.46	1008.03	445.4
1586.58	1445	276.624
1026.94	605.336	1106.77
1751.95	762.144	154.088
1440.78	787.304	237.864
1976.08	1085.14	294.44
1479.41	679.456	491.232
1573.52	905.352	392.632
2267.94	2450.45	279.344
1692.79	615.264	264.112
2417.94	692.784	223.72
3254.21	1080.11	201.008
1366.12	735.216	351.968
1215.57	565.624	294.712
2814.52	504.696	613.088
2224.42	561.68	238.952
1303.15	983.008	275.128
1591.74	1156.82	268.328
1494.5	530.128	287.64
1234.2	330.072	170.952
1454.79	634.712	261.392
1701.09	783.088	298.656
1828.79	565.76	200.464
3945.77	727.6	858.432
3558.3	647.088	468.792
918.544	803.216	206.856
1802.54	309.536	249.696
3793.45	398.888	420.24
1660.56	1249.84	424.32
2691.71	468.928	300.696
2478.74	512.584	207.808
3438.49	1349.39	161.296
2880.89	984.64	251.192
1657.98	1971.46	504.832
1592.56	1309.14	308.992
1301.79	1003.14	323
871.896	508.096	223.584
1568.08	861.56	163.88
1076.58	460.36	151.232
3713.48	749.088	248.336
170.816	718.76	188.36
2890.95	772.344	347.752
2190.96	938.128	384.88
2947.66	1095.48	200.736
3157.65	2670.5	318.24
1757.12	777.24	204.816
1827.7	1172.86	360.128
3351.86	1102.55	426.768
1429.22	805.256	282.472
1156	543.456	391.408
1941.94	2431.82	377.264
971.992	2097.26	243.44
1611.74	615.536	133.144
2746.93	635.12	436.288
1105.41	794.104	397.664
3502.54	668.032	414.664
1599.9	723.792	253.232
1894.89	372.912	258.536
2448.27	1114.93	311.168
1248.48	1134.92	227.8
2032.52	914.328	710.736
1129.75	808.112	217.328
1942.35	589.968	400.112
2264.13	442.816	333.608
5688.74	1235.7	239.088
1851.64	1259.09	346.8
1216.79	489.464	199.92
1916.24	628.048	350.064
1663.28	697.816	1503.48
342.176	709.784	621.384
2360.55	416.84	175.44
2376.06	527.272	578
1402.16	678.096	249.152
2355.11	740.112	399.704
1230.12	582.08	403.92
6116.46	785.808	310.76
1119.69	739.568	257.176
2567.14	941.256	450.432
3111.14	1337.56	333.064
1559.65	1096.43	351.016
1386.79	632.536	149.056
3205.79	505.376	241.264
2751.01	1496.82	343.128
4793.32	700.672	192.848
1870.27	583.168	352.784
1381.9	588.608	175.576
1833.14	882.504	228.344
1917.06	871.896	233.92
1567.13	512.04	354.96
1129.21	658.92	236.776
1555.98	619.344	448.8
2651.86	782.952	219.232
1117.38	534.072	199.92
1113.98	4329.02	187.272
1624.66	1161.44	235.688
2894.35	601.392	320.144
2033.74	953.36	186.592
2129.08	805.528	400.928
1556.66	1101.33	296.072
2412.1	666.128	212.024
452.064	418.472	312.664
1040.54	600.848	412.352
1392.5	558.96	397.392
1453.02	487.832	623.832
2098.07	466.616	344.488
661.912	854.488	506.872
127.704	584.256	428.536
3702.33	898.688	637.432
2171.38	670.208	1325.86
1341.64	463.488	432.208
2039.73	1231.48	264.656
1828.66	1120.37	253.096
1356.74	1837.09	354.008
2190.14	847.824	679.456
1249.84	974.712	268.6
2871.78	390.184	191.488
3458.75	773.704	272.816
1411.68	1073.04	215.016
1160.49	800.768	406.232
1943.85	514.08	276.896
3433.59	1340.01	362.712
2075.9	506.736	202.096
1480.36	667.08	910.248
1552.98	794.784	340.272
1245.62	565.216	742.424
4617.2	1153.28	273.768
2250.26	886.312	429.896
1422.42	681.904	662.864
1028.84	1421.61	292.264
1366.66	553.384	460.496
1759.3	598.264	512.312
1950.65	755.48	175.848
5163.92	750.992	293.488
1614.73	1312.13	363.936
997.016	1807.44	287.504
3956.78	1027.48	178.16
1741.75	861.152	248.064
1703.13	664.088	224.808
1894.89	738.888	299.2
2621.54	1022.99	866.592
4554.37	1027.34	218.28
1179.53	479.808	614.992
1485.53	804.168	221
2609.43	351.288	156.4
1747.06	1758.21	544.544
3744.76	1856.13	483.072
2107.46	530.536	443.496
3599.92	567.936	279.888
1880.2	455.736	269.96
2523.34	737.936	538.424
1274.32	1535.71	504.424
1648.32	572.016	300.832
3482.14	340.952	217.192
2494.38	563.992	317.696
2510.83	669.12	156.128
1651.45	455.464	334.288
833	484.704	168.232
1351.84	771.8	572.832
1450.17	374	300.696
2297.99	832.456	173.536
1563.73	333.744	238.952
1587.26	531.08	292.808
3378.78	912.696	198.288
8017.47	654.568	216.784
1415.62	776.832	586.432
7509.65	1754.67	321.096
1318.52	459.136	547.128
1467.17	906.304	287.64
1000.01	854.352	226.984
1525.92	853.128	287.368
1626.56	996.472	1086.78
1436.16	618.12	283.152
2996.9	1691.7	210.936
2190.96	791.656	343.4
2176.14	718.624	240.72
933.912	359.584	372.504
3415.5	508.776	175.44
1591.47	714.952	350.064
1073.58	466.072	400.384
4523.09	819.128	416.704
2008.04	2136.42	222.768
1410.86	1345.04	221.272
2652.68	658.376	414.8
1438.06	537.472	225.08
2355.52	723.656	332.792
1808.39	586.704	249.016
1587.26	608.056	373.048
1203.46	418.472	431.528
1747.6	383.112	301.512
1949.15	1852.32	317.016
1876.26	447.44	248.608
1787.72	876.112	147.696
3059.05	418.608	157.896
2316.9	1958.13	525.232
2326.69	273.904	204.272
1012.79	549.168	275.536
1952.82	356.048	342.584
3497.51	905.624	384.336
1309.27	716.312	220.592
1343.27	982.328	211.888
1022.58	784.992	637.704
1064.88	707.336	206.992
931.872	1236.51	338.368
3474.39	729.504	287.368
1015.65	983.008	456.008
1635.54	896.92	259.08
9097.18	481.848	266.832
1789.08	827.016	783.768
3084.89	466.888	217.056
2482.95	429.352	257.448
1202.38	493.272	707.336
2094.4	541.552	307.088
2176.27	1466.08	309.944
1728.56	479.4	346.528
1227.4	418.88	163.88
1876.94	522.784	951.184
1219.24	619.616	286.008
1525.51	784.72	276.896
1515.99	868.36	218.96
1571.07	640.016	214.608
1560.19	441.184	202.912
3288.07	342.448	362.848
3566.6	565.216	847.008
1383.12	615.944	289.816
2700.14	873.392	575.144
1626.56	727.328	457.912
1765.55	591.736	362.168
1543.06	961.52	284.92
3946.04	912.696	446.624
1797.24	795.056	576.232
1058.49	465.664	383.656
2064.21	589.016	232.832
1179.53	1054.41	244.12
1816.69	680.408	399.16
7016.51	578	638.656
2023.41	467.84	433.296
1792.89	609.552	344.352
3550.55	402.696	319.872
2284.53	1593.78	445.264
1720.54	779.144	154.496
1746.92	773.16	310.216
3345.06	464.304	228.616
3788.55	666.264	187.272
1746.51	854.352	700.672
1312.54	903.448	385.016
1693.34	303.688	278.392
5040.02	654.976	450.976
2435.08	688.704	139.536
2848.11	1025.3	218.96
2765.83	582.488	205.36
1264.26	746.776	437.512
1707.62	2567.14	198.696
1160.62	1079.3	224.128
1764.19	1208.9	213.112
2079.44	1174.77	198.56
981.24	756.16	176.528
2908.63	557.192	309.808
2398.36	785.536	491.776
2872.46	818.72	696.456
1297.85	1035.91	603.16
1996.21	1807.3	270.096
3616.78	1838.04	615.264
1085.82	1105.27	1071.68
1281.12	624.376	288.592
1385.98	851.632	465.664
369.784	1532.45	266.968
1125.4	555.152	121.04
1946.7	697	481.576
2695.52	579.224	140.896
1186.6	802.264	189.312
3849.62	541.144	294.168
1083.1	2363.95	368.968
1590.66	734.128	343.4
2595.29	654.16	230.112
7690.26	720.392	271.048
2028.71	447.032	234.056
783.088	524.416	278.12
1588.34	1690.21	187.816
1486.48	679.864	315.248
1679.46	2298.94	277.304
3054.42	666.264	275.808
6539.15	884.136	395.76
3558.71	1649.41	232.968
2461.33	427.856	247.928
1235.83	859.52	739.84
3310.1	534.208	284.784
1265.34	477.632	499.392
1816.01	1438.88	273.088
1509.33	909.16	248.064
1536.53	1112.34	308.584
2971.6	281.384	213.248
2527.02	619.616	252.144
1457.1	757.792	368.288
1650.5	933.776	719.848
997.56	475.32	219.912
4441.49	385.016	319.872
1822.67	2016.74	487.968
1310.5	1383.12	250.376
1044.48	1964.11	303.96
1033.19	889.576	247.248
1311.04	1304.65	559.776
1019.86	561.952	178.296
2532.05	787.44	332.928
949.416	841.704	437.512
3162.68	1319.06	532.848
2392.38	991.032	310.624
2097.39	1067.74	574.192
1888.22	531.08	217.056
1256.5	626.28	221.272
951.592	841.024	369.784
4081.9	600.576	524.688
2552.45	1163.07	329.8
841.568	589.968	279.072
1672.12	1718.63	412.216
2503.49	662.184	274.312
5906.21	685.168	417.52
4419.18	715.904	197.2
7599.82	832.456	375.904
1450.03	1354.83	173.4
1880.06	1538.43	208.352
1025.98	664.904	327.08
1864.83	658.104	372.504
2424.88	893.792	241.536
5786.26	787.576	364.616
1749.5	1326.27	252.008
1112.07	562.496	243.848
1184.97	697.136	522.104
1807.44	669.256	209.984
2062.17	966.008	358.768
1548.36	474.368	281.656
1244.67	1260.58	365.432
1327.09	1147.3	265.336
2771.95	1132.61	143.752
2428.96	736.712	209.168
817.36	386.24	274.856
1409.5	897.464	213.112
1461.59	442.408	152.184
1907.13	736.168	277.304
567.256	949.824	277.712
1662.06	591.6	308.04
2969.29	522.376	224.944
1179.39	506.872	191.488
1895.98	485.656	493.272
1856.13	775.608	239.768
1934.06	642.6	322.864
2165.26	1678.24	336.872
1642.2	915.416	238.272
1949.83	614.04	335.104
1598.95	912.016	329.256
1921.14	792.064	469.336
1607.66	662.32	453.968
3506.08	593.912	318.92
1183.34	1343	204.816
3704.37	724.064	291.584
2856	677.008	580.72
1107.31	586.432	329.12
2026.67	1103.37	211.48
1832.46	538.424	187
1567.4	646.68	290.224
2574.21	450.024	393.448
2728.43	815.456	497.488
1527.28	708.288	300.968
1347.76	1141.72	288.32
1973.63	1056.58	297.16
4068.17	384.744	170.544
1505.11	631.856	643.96
904.128	839.664	261.528
3212.32	569.84	129.608
5680.86	920.312	282.88
2367.76	231.472	300.424
1510.01	729.368	276.896
3833.02	666.808	604.384
2177.63	619.208	292.672
1347.35	604.248	434.52
1932.15	737.528	542.504
1940.99	736.304	266.696
4217.77	1122.14	246.84
1571.75	1060.66	342.856
4110.6	535.84	143.344
3428.42	1054.82	376.04
2279.77	642.736	428.808
1504.16	439.28	338.776
1360.95	751.264	347.072
1976.62	368.56	441.728
2683.55	603.84	411.264
1275	536.792	239.904
1108.67	583.984	265.064
3450.46	748.816	363.936
2104.6	667.488	265.472
3961.68	2871.37	166.464
3478.61	784.448	411.128
1034.96	1179.39	222.496
2020.28	988.176	305.184
1256.91	481.712	314.568
1155.05	656.2	250.784
1033.87	389.232	318.376
1197.89	677.416	329.256
1719.86	858.024	330.752
2454.94	626.28	284.512
4902.39	913.92	327.216
1487.16	587.52	224.128
1269.02	413.984	206.176
1138.86	808.248	299.472
1965.47	654.84	211.888
3039.46	1285.06	204.408
2811.39	587.52	404.736
3674.31	2403.53	251.192
2199.39	1298.94	413.168
1418.48	646.952	364.888
1201.02	588.064	339.32
2570.13	716.176	623.288
727.328	858.432	204.408
1309.41	391.68	431.392
1095.62	818.176	234.6
5199.42	976.752	285.192
1408.01	871.352	518.704
1948.74	1027.21	313.208
1453.7	1050.46	223.04
1274.46	772.616	251.872
1452.07	818.04	308.448
3190.02	735.896	339.32
4482.02	909.432	196.656
1460.37	1255.14	318.24
4622.23	910.928	146.336
1652.94	1126.62	294.304
1577.19	771.936	250.376
2077.54	491.912	397.392
3208.38	381.752	258.808
1544.55	1156.82	206.312
1790.98	902.904	405.144
1642.47	868.224	212.568
1260.99	690.744	322.32
2437.8	527.408	265.608
1259.09	409.088	235.28
1756.03	1128.66	222.224
1020.54	926.432	191.896
1807.98	669.12	378.896
1026.12	862.104	261.936
2570.94	486.608	175.168
2153.97	902.904	217.736
3021.78	1385.84	234.328
3493.02	718.488	156.944
2415.22	1009.8	273.224
2681.38	1361.9	279.616
1308.18	653.888	133.28
3023.96	498.44	216.784
1138.59	1980.57	195.16
1184.02	418.88	311.576
1317.57	645.32	218.28
1715.78	812.328	295.12
1513.14	803.216	154.904
1926.98	1803.9	522.512
2877.49	787.168	603.296
3454.4	782	244.664
1749.37	373.456	187.68
1902.78	449.48	202.504
1129.34	498.576	204
1876.94	405.552	198.56
1892.17	724.472	327.352
1449.08	710.464	400.52
1942.49	649.672	419.968
2119.29	2417.54	314.16
978.112	740.656	422.688
4031.04	1321.1	192.848
1968.46	1229.71	981.648
1854.09	489.056	316.88
1343.95	959.072	322.456
1660.02	964.648	206.992
2421.34	1331.71	392.36
1414.67	813.416	412.624
1756.3	635.528	228.208
3223.88	1001.5	646
1235.7	1026.39	431.12
3018.52	565.08	246.432
2184.84	616.624	217.056
1294.45	469.064	292.264
1584.94	577.864	1135.06
1287.92	576.368	730.728
799.408	1034.14	285.056
1629.55	409.224	258.4
1702.58	728.144	406.368
3031.85	636.072	279.344
1371.97	604.928	313.752
342.992	813.96	558.008
1936.64	533.8	579.496
1480.09	990.624	132.736
3315.54	1723.8	559.232
1817.91	1021.22	210.528
1419.98	1086.5	232.016
2321.93	750.584	251.872
1478.86	682.448	342.448
3374.98	765.816	419.696
1126.76	671.432	409.768
2835.87	606.424	235.96
1160.49	630.224	801.176
4045.18	475.864	641.648
1608.2	1206.73	618.392
1899.65	933.776	547.672
1649.82	316.2	250.784
2092.09	883.184	278.12
2002.33	853.672	191.352
1645.06	937.992	327.624
1271.6	916.504	307.496
2308.87	317.288	512.176
3072.92	798.728	340.68
1822.13	1022.04	325.312
3357.84	835.448	233.24
1625.2	1840.9	265.336
2065.84	236.096	260.44
976.616	947.512	846.464
1515.72	2594.06	628.864
1507.15	1014.29	160.072
1438.61	812.328	150.008
3169.48	773.568	367.608
7102.74	827.832	602.208
1759.84	2057.14	455.056
1748.01	2348.18	235.144
1572.16	961.112	195.432
6133.33	1002.46	424.592
2574.89	1055.09	301.104
1775.07	1935.42	428.672
1417.94	677.416	258.128
2141.73	522.648	608.736
1011.84	707.472	362.984
1438.74	914.872	688.024
1450.3	928.064	224.264
1931.88	649.4	671.024
1314.98	2263.72	297.976
1223.32	476.816	210.528
1721.9	608.328	208.624
1091.26	660.96	241.4
2125.41	577.592	316.064
1540.34	1018.64	209.168
1871.9	632.536	128.52
2933.52	1033.06	337.008
1313.08	782.68	220.184
4322.62	419.288	311.032
3077.54	800.904	281.928
1385.57	1206.46	319.192
1874.49	662.048	434.248
1552.17	496.944	152.728
1298.39	1070.32	259.488
2239.24	615.944	156.264
3260.06	915.96	571.336
1525.38	1175.99	237.184
2723.13	771.392	203.864
2899.79	939.624	251.192
2853.01	806.344	281.928
3760.54	1030.06	236.64
996.336	889.032	307.904
2561.42	936.496	204.136
2292.14	839.12	308.856
1006.4	1319.74	245.344
3524.58	709.512	129.744
2682.33	573.104	210.936
3157.24	529.72	219.096
1170.69	668.712	320.416
2361.78	1447.45	215.56
4083.81	811.512	355.776
1539.93	756.568	242.624
2085.02	1327.63	323.408
2121.33	293.624	186.184
1428.95	764.048	692.92
1701.22	617.848	188.224
1464.18	949.008	539.512
1355.51	977.16	254.184
1475.19	977.296	245.888
2071.01	958.8	136.136
1948.74	1160.49	288.864
1525.78	1726.93	326.944
1465.54	1045.16	228.752
1991.45	1507.97	388.008
1804.72	829.872	558.416
1549.72	473.144	215.832
1111.8	975.528	313.48
4325.48	1144.85	257.72
2834.38	787.032	158.848
1451.39	907.12	181.832
4395.93	1096.02	380.528
1626.29	646.952	280.704
2910.67	671.296	280.84
2168.11	485.656	254.456
1054	471.648	256.496
1837.63	602.888	264.656
1774.12	814.64	377.672
2487.03	576.504	244.392
2695.11	942.616	171.632
1346.13	726.104	447.168
1289.55	337.008	140.216
1309.95	2068.56	413.712
1623.43	480.624	147.832
1546.18	966.144	261.256
1486.34	524.144	240.312
1999.06	2271.34	253.096
3783.25	620.704	216.512
2532.05	789.072	428.536
1424.46	902.904	248.2
1916.92	451.656	201.96
2807.31	809.2	544.68
4787.74	434.792	322.32
1370.61	1120.37	268.872
1548.36	1835.73	200.6
2158.59	518.568	254.728
861.016	564.536	319.464
4756.46	315.112	181.424
3910.41	794.512	125.8
973.216	1123.22	237.864
1433.03	1243.72	207.944
1068.96	963.832	442.272
2306.29	520.608	431.392
1121.73	341.224	294.44
2151.52	575.28	250.512
913.24	674.968	363.936
2123.5	362.984	567.664
6064.92	464.168	214.336
1139.41	763.096	385.424
1895.98	1544.69	156.672
3184.58	1045.3	382.296
2328.73	1924.13	365.024
1292.14	1246.44	169.184
1924.67	984.232	343.944
648.04	572.968	622.2
1617.18	1187.28	375.632
1521.3	731.408	280.704
2348.99	739.16	150.552
2209.59	752.216	350.336
1401.75	911.472	794.512
321.912	909.432	242.216
3613.25	358.224	230.248
1772.35	993.208	227.392
1440.78	447.712	299.472
795.192	1049.38	354.416
4954.07	989.128	205.632
1819.95	862.24	581.4
2140.1	884.136	250.24
2047.48	566.984	462.4
1695.65	529.04	393.856
1115.06	649.944	208.624
934.32	486.472	274.856
1352.52	1050.33	454.92
1582.36	360.672	288.456
2242.78	747.184	546.72
1364.22	554.2	602.48
1860.75	958.664	250.24
1147.84	551.344	324.904
1284.11	409.224	483.48
1222.91	982.056	576.504
1737.81	648.72	334.016
2525.93	661.64	198.696
1371.15	676.736	306.68
3530.02	789.752	572.424
1798.19	2260.73	237.048
2293.23	645.184	276.488
2005.46	852.04	547.944
1466.62	763.776	215.152
2376.74	1151.38	198.424
1881.15	796.144	570.384
1188.78	782.68	198.968
1822.4	510.408	346.664
2499.95	490.96	253.912
784.04	1269.02	423.504
1958.13	1271.6	263.84
3779.03	774.656	1587.26
1368.3	682.856	331.024
4616.79	955.128	290.088
1250.11	981.784	267.104
2004.5	752.08	409.36
1958.94	518.568	129.336
1820.63	687.208	388.28
2173.82	863.328	375.904
1503.62	651.168	164.832
1783.23	507.552	157.216
1436.43	835.176	325.992
854.624	866.864	326.4
1925.9	3582.92	321.232
1353.88	1281.39	276.76
1226.58	445.536	399.024
3635.01	640.424	287.912
1452.48	930.376	420.104
1895.57	478.448	344.488
1148.11	1032.24	376.856
2863.75	1071.27	433.16
1035.64	530.944	400.52
2008.31	991.44	368.424
2002.74	918.408	275.944
2223.46	562.768	394.672
1156.95	513.4	307.768
1550.54	898.824	939.216
2325.06	1532.04	206.856
5282.65	991.44	833
1898.02	717.264	226.168
1931.06	497.488	297.84
1978.66	556.104	230.52
1347.49	667.488	141.712
1898.29	583.576	179.656
1012.66	642.736	265.608
5254.5	660.824	246.432
1600.45	534.616	201.552
1062.7	1372.78	740.928
1630.91	460.632	625.056
1891.22	849.184	372.096
1231.21	660.28	257.856
2334.03	792.2	255.408
1397.94	628.456	367.744
1722.17	545.088	232.968
1705.71	1139	277.032
1907.13	2362.05	207.672
2467.18	1132.06	302.6
3060.54	971.448	847.96
1404.2	1539.79	222.632
2163.49	3995.14	215.832
1807.98	2497.1	373.728
2378.64	765	264.248
3910	779.824	288.32
1182.38	510.136	182.24
2031.43	1874.9	297.296
2523.89	1043.8	454.512
2250.39	1094.66	310.216
1855.45	1164.57	144.568
3900.89	1041.76	268.192
1198.43	1122.27	309.944
3014.85	619.48	753.304
1305.06	589.696	554.744
2636.36	929.016	375.224
1210.67	1309.14	578
2173.14	485.384	205.904
6174.54	606.424	412.896
1013.06	789.616	327.352
1022.86	733.448	288.592
1714.82	827.016	270.64
2300.71	1324.5	319.328
7216.57	553.792	518.568
1528.5	798.456	242.352
1466.62	1268.61	302.464
6372.28	1034.96	429.896
1454.11	794.376	448.528
1746.38	615.4	389.368
4043.28	1365.85	273.632
1156.82	589.152	428.536
4913.54	683.672	323.272
1493.96	407.864	596.768
3295.82	1291.59	265.472
708.696	582.76	300.832
1350.21	652.936	594.592
1782.42	1078.48	628.728
1570.12	498.44	205.36
5465.7	647.36	232.424
903.72	504.424	440.912
2583.18	1136.55	375.632
3414.28	443.904	311.032
1552.85	736.032	161.704
1720.81	538.832	197.744
1640.3	500.208	260.168
2130.17	819.536	447.168
2517.63	878.56	210.8
1464.04	978.656	329.664
2388.43	726.512	161.432
867.544	2663.56	424.184
995.112	409.088	308.992
2290.78	736.304	391.408
1294.04	4126.24	176.256
1162.94	1418.75	260.984
1014.29	507.28	201.144
4343.3	952.136	364.072
1132.47	930.92	326.808
3840.64	1039.58	449.752
3099.03	492.592	442.952
2149.75	760.376	204.136
1828.25	515.848	382.432
2541.98	887.672	308.856
2702.59	806.888	794.648
1287.78	600.032	301.512
1442.42	851.632	255.952
1678.38	705.432	359.856
1716.59	677.96	375.904
3657.99	597.584	334.424
2187.56	562.768	620.296
1606.43	359.584	396.712
2357.56	507.96	332.52
1739.58	1586.85	188.224
1190.14	1755.22	129.2
1114.11	1048.83	181.016
3141.87	1073.58	255.408
1774.12	1093.17	271.592
2428.55	1364.49	237.048
1010.48	856.936	273.088
1311.58	551.888	579.088
1078.07	1198.3	166.872
3806.5	1030.34	369.784
3942.91	777.24	494.632
3071.29	1556.66	324.496
1336.2	400.792	236.912
2017.83	653.48	240.856
1289.42	466.344	325.04
5681.54	953.088	484.976
2841.45	735.76	258.672
1892.03	955.264	237.728
2551.36	888.08	342.448
2154.1	714.68	224.128
6985.1	1175.86	338.504
1144.58	1170.42	247.384
1388.56	871.76	248.336
1542.92	665.856	193.528
2187.42	1079.7	280.296
2081.48	1052.23	296.072
3312.82	432.208	274.176
1784.59	742.832	254.728
1975.94	450.704	255.408
1335.66	579.632	349.384
1035.64	648.72	314.296
1078.62	833.408	284.92
1542.65	946.016	425.408
1376.32	606.832	170.272
1680.69	763.368	324.36
816.408	1515.04	303.688
1682.59	905.216	378.216
1704.62	440.504	591.464
2169.88	523.872	382.16
2189.46	1139.54	232.968
1335.93	2161.31	323.272
1599.22	797.368	178.024
1188.91	586.296	412.76
4074.42	567.528	282.472
1274.59	566.712	374.408
2773.58	588.608	420.784
1716.05	921.672	873.664
876.52	781.592	272
1476.42	634.032	502.112
1266.16	1033.06	317.56
4588.78	489.872	228.208
4051.17	326.128	355.096
1221.69	1065.83	342.584
1965.88	713.184	491.776
2713.34	773.296	252.688
1481.04	620.432	546.04
1077.53	1130.57	386.648
1028.02	802.4	354.96
4061.37	810.832	245.888
963.424	772.888	348.16
2568.36	3986.98	261.12
4060.82	760.92	298.656
1145.39	961.792	232.152
2232.98	845.24	399.976
796.552	717.672	399.976
1539.79	776.288	443.088
2477.92	732.632	269.008
1968.46	677.688	270.776
1380.67	1196.66	372.368
1308.18	1186.19	335.376
1520.62	648.856	221.544
2529.87	850.68	438.6
1266.7	953.36	265.744
1286.02	989.672	489.6
1653.9	742.696	264.248
3153.02	779.96	185.912
2015.52	1531.5	254.456
2629.97	844.696	151.368
1541.83	787.168	322.864
1069.5	1127.17	198.152
2438.21	517.344	824.024
1653.08	714.544	274.312
1272.69	569.432	266.832
1888.5	1743.52	132.6
1532.58	768.128	198.832
1496.41	797.776	368.832
1281.12	853.944	372.776
1003	504.152	304.912
1399.3	441.184	390.864
1107.18	452.608	176.664
1231.07	447.712	168.232
1867.14	1046.11	284.92
1220.87	544.408	237.864
1720.26	1296.9	292.808
1847.7	1349.39	452.744
1656.75	478.312	430.168
1404.06	607.376	120.904
1571.07	753.168	276.488
1259.5	437.512	277.44
1017.69	1485.8	347.888
716.856	727.872	399.16
3690.5	1097.93	315.52
2138.33	771.664	398.752
1068.01	882.232	444.448
1594.87	694.688	237.048
1729.24	717.808	140.352
1803.9	622.472	401.336
4213.96	683.536	363.392
2456.98	484.024	181.424
1191.5	2626.3	456.008
1938.27	1759.43	516.664
1460.78	805.256	291.856
1791.66	277.712	188.496
2176.14	695.504	552.568
2719.46	1693.47	344.624
2548.64	588.2	519.656
1771.4	925.344	341.768
1451.8	402.832	327.896
1696.19	885.088	339.184
1251.34	393.312	382.84
3020.42	396.576	342.856
2456.43	823.48	290.36
1748.01	679.456	557.192
2070.19	747.048	324.768
1408.42	454.784	250.24
5946.46	484.704	191.624
1886.73	712.368	276.216
3131.81	917.864	247.112
1323.14	2845.66	472.328
1819.14	717.264	232.56
1350.89	330.48	175.168
1481.86	583.576	332.52
1364.9	431.12	528.632
2185.66	694.144	266.696
2705.72	309.264	418.064
1634.72	673.064	297.704
2681.92	518.704	235.824
1869.46	1305.87	218.824
1255.28	759.424	199.512
1887.68	703.256	279.888
2664.51	453.832	517.616
1735.9	815.048	154.768
2914.75	676.464	182.784
2860.35	755.888	495.448
601.664	1011.16	750.312
1290.78	334.832	357.816
1261.54	405.688	237.592
862.104	1847.7	509.32
697.816	2678.79	1011.02
1318.11	838.712	292.4
1350.21	928.608	183.6
2076.99	606.016	313.616
7598.46	912.968	291.312
3271.62	459	359.856
1418.48	691.424	418.88
1237.33	832.728	349.384
3748.3	1615.95	280.024
1456.15	743.512	183.464
2610.79	613.632	535.704
3657.72	569.432	384.064
3918.43	883.456	704.072
2144.58	734.4	319.464
3476.84	561	253.912
1500.35	788.392	212.296
1429.5	1207.14	291.72
2580.74	435.744	509.048
1280.17	675.648	225.76
2055.64	848.096	862.376
1715.23	805.392	142.392
6999.65	1138.05	258.264
1643.56	861.288	309.264
1213.66	482.256	296.344
2021.5	926.16	244.528
2791.94	946.832	320.96
1854.9	633.624	425.272
1362.72	768.672	278.664
2704.5	588.336	318.92
1550.81	494.088	700.128
1176.4	692.92	142.664
2337.98	619.208	218.688
2092.63	846.872	290.224
3825.95	931.736	565.488
1243.31	945.472	586.976
1307.91	687.208	130.832
1598.14	562.904	194.48
1456.15	1737.26	215.56
2432.22	871.216	174.08
2413.59	1192.72	286.688
3051.43	506.192	268.6
1779.02	807.296	358.36
2863.48	736.304	264.52
1753.04	558.688	296.208
3698.38	1615.54	577.728
2030.62	553.792	557.464
1256.37	2629.7	355.368
1615.82	615.536	470.696
1179.94	799.68	544.952
2399.58	1115.47	395.352
2297.58	655.52	228.208
2144.86	1343	138.992
3317.86	1384.75	173.128
1834.78	996.336	415.616
4148.27	1878.02	230.112
958.12	817.496	359.856
1969.82	562.904	204.816
1368.98	539.24	139.944
1170.14	793.424	273.496
4229.06	756.16	340.272
1861.7	1028.3	484.432
1369.52	767.312	339.864
1694.29	680.408	368.832
1239.91	1206.86	262.752
2219.66	461.176	399.296
1123.36	771.936	211.616
2477.1	1157.5	273.224
3894.5	1306.96	308.72
1089.63	345.576	316.064
2261	1047.06	296.888
1267.79	673.472	279.208
1795.88	612.952	170.952
1282.07	435.88	375.36
4400.42	649.4	153.816
1483.35	758.88	305.456
1019.32	490.96	174.76
1248.34	566.712	358.088
2901.15	1951.6	468.52
1154.78	662.456	203.048
1876.66	526.592	488.784
1719.31	659.736	238.408
2185.38	2586.18	401.064
6269.19	643.416	268.6
1221.55	1102.42	212.296
2112.49	977.568	235.824
1858.44	622.336	178.568
1349.53	613.496	167.28
4401.91	1189.18	157.216
1192.45	1054.14	397.528
1226.18	452.88	339.728
1694.7	737.256	445.808
1615.68	455.6	284.104
3711.71	1600.04	261.664
1087.86	391.68	169.728
1938.68	489.464	405.824
1906.31	438.736	142.528
1477.5	714.952	441.728
1443.5	910.384	349.384
2957.05	1724.75	372.504
2053.87	510.816	719.168
4097.82	695.232	209.168
1119.82	783.496	348.704
2621.4	470.424	192.168
1156.27	707.2	240.992
1754.26	1859.8	370.056
1463.63	949.96	354.416
2952.97	473.28	772.48
1442.82	415.616	242.896
1143.49	717.4	395.624
1118.87	535.976	334.424
1841.58	929.288	349.656
4707.23	749.768	288.864
2652.14	1058.9	211.208
1475.06	629.272	470.016
3285.22	714.408	315.384
1114.52	636.752	137.224
1847.15	645.32	335.648
1642.47	448.936	457.504
2005.73	836.264	336.464
1443.5	424.048	541.824
1062.16	1799.01	213.384
1983.97	698.632	255.68
1837.77	802.4	330.752
5876.15	433.432	125.8
1131.79	544.68	307.496
2260.18	535.976	376.72
1463.09	595.136	317.424
2691.3	427.176	384.064
1153.14	2062.17	418.2
710.736	643.008	328.304
2211.22	545.088	384.064
1385.57	533.12	286.416
4214.64	3002.61	432.888
2548.37	767.72	387.736
1408.96	447.984	245.072
2218.84	579.904	261.664
2731.56	685.304	412.624
1968.46	1015.1	386.24
1447.18	934.456	296.072
2885.24	1007.49	328.032
2124.86	2330.22	493.544
1387.47	1281.94	146.472
1039.86	551.208	290.496
3689	2038.78	258.536
4741.1	956.488	534.208
1230.94	992.528	308.312
3099.44	501.976	277.032
2144.72	710.192	175.168
1124.04	683.4	385.152
1814.24	822.936	342.992
1247.12	1306.14	320.144
2484.86	1097.66	192.848
1966.97	504.152	352.648
1104.59	504.288	323.136
1439.42	1432.08	402.016
1298.12	1965.34	438.872
971.992	705.432	205.496
2812.07	840.752	232.152
2518.72	935.952	213.384
988.992	1203.6	287.096
1275.95	754.256	658.92
1060.12	905.76	571.744
3359.88	608.328	198.56
3192.06	859.112	381.48
1342.32	1556.52	178.16
1915.56	801.312	402.56
1433.71	918.952	259.624
2059.86	630.632	207.128
977.432	1151.38	361.76
889.304	3795.35	364.208
1607.52	1707.34	434.928
1686.26	836.672	230.384
2960.31	865.232	214.608
2056.59	479.4	407.048
1631.86	826.2	231.064
2052.78	870.4	275.264
3409.93	855.576	271.184
2099.3	826.2	169.728
1620.85	740.112	382.84
2848.66	1077.94	219.232
2483.9	879.92	386.512
2463.1	638.248	366.248
2721.09	1176.67	588.2
1459.82	457.096	350.88
1442.96	453.696	411.808
1702.72	963.288	293.216
1552.44	2266.44	389.776
309.128	1502.8	358.768
2423.25	951.048	291.856
3104.47	973.08	538.016
1543.6	951.184	748.68
1495.18	728.688	255.136
3897.76	551.616	190.944
2670.5	818.312	412.76
2995.94	1730.06	303.28
2627.11	489.056	802.944
2207.28	737.12	259.216
2404.62	825.112	204.408
8576.84	917.048	284.376
1855.58	1430.04	469.472
1590.93	665.992	474.912
1499.54	575.144	294.304
1608.74	784.856	306
2956.23	720.8	284.92
2042.04	667.08	223.992
996.88	625.736	189.448
3081.49	700.672	212.432
930.784	1852.32	477.632
4129.64	473.416	200.192
3164.18	645.456	588.88
1107.04	416.568	279.344
1365.3	1265.07	385.424
2654.04	493.68	277.44
1319.2	564.808	302.464
1978.8	430.576	295.664
1634.72	1101.74	155.992
2058.63	681.632	185.368
1389.1	826.88	610.232
1410.46	800.904	489.872
2409.1	474.776	213.928
2471.8	926.704	214.064
2064.62	513.944	310.896
2759.44	1387.2	423.096
1996.89	837.216	407.048
1414.13	633.08	221.68
1516.13	930.92	260.44
1999.47	836.4	326.264
2235.16	672.656	456.688
1504.43	1509.6	287.504
1642.06	595	377.128
1009.12	1340.96	132.872
3526.34	386.512	245.208
1830.42	442.272	493.272
400.248	691.288	356.32
2113.85	900.456	182.104
2557.62	699.856	140.624
1736.58	780.776	238.68
3717.97	507.96	279.752
2698.92	398.208	156.128
1727.06	901	472.736
1863.61	827.56	466.616
1254.6	1047.34	517.208
2314.31	1339.06	342.176
1867.82	554.336	385.288
1084.74	2306.83	286.28
1850.55	1419.3	366.656
2230.13	1560.6	534.752
1354.83	591.736	338.232
1123.36	1015.38	755.752
2144.18	768.672	697.544
1411.27	351.968	404.328
1779.42	806.208	245.072
3664.93	378.896	279.344
1539.93	737.936	240.856
3375.93	617.576	274.176
1157.63	578.68	250.376
990.76	659.6	419.56
1987.91	1048.15	553.52
2061.9	651.712	200.464
4854.93	1224.27	523.872
1811.38	508.912	200.192
1649.95	499.392	274.176
1596.78	640.288	294.44
2566.46	384.744	281.384
4096.32	671.432	401.2
3197.9	666.672	359.72
2092.09	629.68	517.344
2500.77	474.232	297.16
1671.71	1062.84	319.056
1435.75	1145.66	287.776
1643.29	1031.02	202.504
2877.76	1058.22	356.048
5546.49	665.856	263.84
1976.76	1755.22	212.84
2918.29	903.992	282.608
875.568	550.528	294.848
1374.28	2064.07	303.688
4228.24	924.936	253.912
1418.89	537.608	283.288
2152.06	484.024	426.36
1356.33	681.904	294.032
4106.38	561.272	160.888
1485.8	714.272	124.032
6186.91	1890.67	162.928
1860.21	738.208	128.792
2936.92	1531.77	357.816
2622.62	527.136	217.056
995.928	774.384	363.12
1771.94	1261.54	175.44
1376.05	949.008	191.488
3112.9	491.912	347.344
1496.82	693.464	407.864
3506.49	593.232	396.848
6380.98	685.984	251.464
1212.58	926.704	264.928
1538.3	536.928	984.912
2728.98	474.64	881.28
2134.93	3369.26	271.864
1284.38	711.416	450.296
1286.42	700.264	311.576
1552.58	575.28	499.664
1392.5	863.464	155.856
2467.18	449.48	689.112
1853.68	668.304	159.256
3173.42	673.744	386.648
2592.3	697.544	324.904
2545.51	465.936	262.072
1252.83	1063.66	184.416
1810.02	548.352	465.936
4891.1	858.024	463.624
2091.27	502.52	270.096
5640.19	1881.97	397.528
2366.81	1415.49	294.168
3421.08	881.552	362.168
1150.02	1044.62	561.544
982.192	652.12	195.84
1300.7	796.688	136
980.832	626.688	542.504
2810.44	452.336	223.992
1713.6	495.176	334.016
3499.14	475.184	136.408
3110.59	495.584	574.6
1407.19	614.312	475.048
3682.74	1019.59	286.552
1217.88	1375.91	483.208
1978.66	592.552	410.448
1334.98	1113.3	275.672
931.6	614.04	208.216
1610.1	542.776	265.744
3090.06	569.84	230.52
2318.12	498.168	480.08
1084.19	2955.42	216.104
1822.67	538.288	515.984
1698.91	306.816	407.184
1319.34	804.44	235.28
1938.54	681.632	249.968
1738.22	708.968	324.904
1193.13	644.912	389.912
1386.11	742.424	272.136
2141.59	542.912	535.024
816.272	987.496	328.576
3012.81	1661.65	227.936
1302.2	614.176	232.152
1101.33	1403.11	223.856
1453.84	756.296	440.64
2325.46	832.456	476.544
1893.53	945.2	332.52
4912.86	494.904	227.8
1555.98	531.488	273.768
968.728	561.272	572.56
2757.54	497.488	234.736
1906.18	752.488	348.84
1563.73	964.24	874.752
2152.2	964.784	485.656
1963.84	805.256	335.648
2436.98	700.808	467.976
1282.21	566.984	253.64
5275.98	858.296	280.432
1716.18	1452.07	167.416
1560.33	318.104	441.456
459	821.304	295.528
2093.58	765.952	280.024
2183.48	1654.17	248.064
2179.4	1707.62	217.464
2004.37	1044.89	319.328
935.68	1067.6	164.968
2106.78	615.4	306.136
1313.35	833.952	222.632
1783.37	843.608	249.968
1141.31	582.08	300.288
1975.94	916.64	325.992
1502.39	687.344	162.928
3232.45	989.808	188.36
980.288	1221.14	313.48
1833.14	472.872	599.488
1632.82	661.232	563.04
4187.44	828.92	302.056
1071.95	749.224	164.016
1220.74	895.56	348.432
1511.78	515.44	501.296
906.984	1648.73	159.8
952.408	615.264	337.28
1349.8	1625.2	347.072
1464.45	889.44	143.344
1140.36	887.672	726.24
4309.57	950.776	224.264
2029.39	893.384	245.752
1742.57	1777.52	175.712
1368.98	1367.07	241.536
3717.83	1111.94	238.816
1891.35	446.08	342.584
1559.24	999.192	253.232
847.552	1363.67	337.008
1722.17	418.88	403.376
2269.02	677.96	399.16
1884.55	918.68	457.64
5266.19	508.096	249.288
1712.65	745.28	358.36
2016.47	1341.78	355.776
1462.95	468.112	263.024
1385.43	491.096	181.424
1518.98	750.448	327.76
3545.52	629.952	231.608
1449.62	634.848	445.672
1803.36	1168.92	206.584
1538.43	850.272	334.696
1881.15	1054.82	361.896
4484.19	238.544	198.56
1700.27	428.4	189.312
878.56	575.552	224.672
1083.24	381.344	317.288
2187.7	582.488	430.712
1272.55	415.616	468.112
2556.12	939.624	761.328
2145.54	423.776	231.88
2624.26	1311.72	241.944
1712.65	861.152	298.112
2301.94	630.768	252.824
2551.9	507.28	264.792
2705.99	1973.9	295.12
1352.11	651.712	319.056
1799.14	1005.99	211.888
1126.08	518.568	522.648
1677.7	1876.12	343.808
2642.07	570.112	335.24
2046.94	665.856	396.576
1665.73	653.072	201.552
1821.72	588.608	317.152
1659.2	510	164.832
1111.66	552.568	442.136
1262.62	556.104	331.432
1560.87	628.184	197.608
2254.47	658.648	321.776
196.792	711.824	187.136
1069.23	650.488	329.528
1071.54	2582.1	269.688
1443.78	798.592	220.728
4834.8	947.648	207.128
3011.86	258.944	375.904
1297.71	827.832	340
3588.63	1561.01	339.32
1785.95	454.648	185.232
2851.1	904.944	1543.6
1439.15	641.104	304.232
1858.85	914.056	323.272
2869.6	867.952	171.904
2816.97	385.424	173.944
2408.83	797.368	248.744
2060.26	827.968	599.488
2506.62	534.208	174.08
1496.14	861.152	712.096
1614.46	1697.42	239.904
2589.71	854.352	575.824
2294.05	1091.26	361.08
1825.8	457.368	304.504
1911.34	970.224	171.088
1082.7	1103.23	169.592
1018.91	583.304	327.352
4049.26	690.88	146.064
1139.54	778.736	263.704
2053.87	752.76	245.752
1175.18	369.648	314.432
2212.86	1099.02	276.624
1760.11	3153.02	227.12
2083.52	424.864	339.864
2124.05	640.832	200.736
7616.95	863.6	389.64
1988.05	1116.29	431.8
1617.31	1117.92	275.808
4730.35	1300.84	248.608
1952.28	957.304	485.928
1325.59	957.168	148.512
1662.6	1191.77	213.248
1649.41	595.544	330.208
1295.13	1449.9	271.864
5158.07	403.784	253.64
7643.88	945.336	326.4
1840.22	1009.66	205.36
1545.1	694.144	243.032
5270.68	610.64	121.448
2830.57	399.976	211.208
1778.74	546.856	445.264
3751.02	1610.1	434.928
2305.74	698.632	296.072
1583.45	664.632	545.632
1086.5	963.016	213.384
1074.81	504.696	303.416
1985.19	515.848	439.008
1808.39	1213.39	601.256
982.6	692.376	289.408
1422.97	549.032	352.512
2246.99	867.136	198.152
2516.54	790.84	360.128
1928.75	1206.59	239.224
1564.82	1544.42	207.4
863.6	814.504	300.424
1403.93	335.512	379.168
1520.62	440.776	577.184
1790.03	656.744	199.24
1760.38	921.808	243.576
1421.61	1757.66	408.136
1159.67	946.832	476.544
4939.93	917.184	143.888
1573.38	444.448	228.888
1777.11	500.888	350.88
1728.29	460.36	722.704
1899.24	715.496	306.816
5709.42	759.832	223.312
1304.24	475.184	331.704
1177.08	300.56	357.68
927.928	1632	210.664
6101.91	1472.74	251.736
1507.42	1043.39	280.568
632.536	1649	320.144
1781.87	395.624	260.44
1788.94	325.584	310.624
1673.89	697.272	189.04
2360.01	530.672	214.2
2422.16	566.984	410.176
3072.78	489.6	224.4
1589.98	1260.72	241.944
1636.76	1591.74	206.992
3726.94	1685.45	362.848
946.968	681.36	208.896
3578.7	500.48	177.616
1658.93	1867.14	251.056
5403.82	613.496	334.968
1665.32	485.52	231.744
6605.93	425.136	198.288
1844.02	1283.3	381.208
2190.82	990.896	161.568
2942.77	819.536	511.632
1528.23	406.504	321.096
4430.88	580.856	195.704
1504.57	946.56	244.392
2565.64	746.368	292.808
2225.5	1079.57	289
1946.84	1742.98	316.064
4224.02	823.888	289.816
2434.67	1160.49	922.352
1316.34	635.8	282.2
1184.56	479.672	226.984
1634.04	2284.26	206.04
1089.22	353.464	339.728
2192.46	771.664	226.168
2807.31	912.696	211.616
1505.66	792.336	347.48
1508.65	770.304	342.312
4874.51	824.976	250.648
1760.25	842.384	303.824
1354.83	1228.22	380.936
1532.86	787.576	253.912
1802.14	1010.21	277.576
1793.7	541.552	270.368
1666	1193.4	223.312
1124.31	985.048	236.504
1098.34	628.048	412.896
3619.23	981.104	286.416
1548.63	1072.22	255.952
1084.06	1035.23	241.536
3797.94	729.368	203.32
1488.38	1042.85	280.568
3383.54	673.608	649.808
1685.04	820.216	223.584
1120.1	1016.6	245.616
2117.38	449.072	127.976
1580.18	613.36	203.184
1022.18	987.088	227.8
1330.9	640.832	258.808
1230.26	1074.94	370.464
1895.02	1178.98	402.288
1411.95	645.32	420.648
1955.82	498.44	266.288
1060.53	780.912	252.688
1069.5	874.888	263.432
1185.78	1047.61	178.432
3016.89	1239.37	250.92
1726.11	602.752	199.24
4731.58	567.392	256.768
2001.1	641.648	236.096
1128.66	1573.79	561.68
1378.36	729.504	324.904
3065.98	865.232	380.392
1061.21	580.04	243.168
8536.58	773.16	915.96
2636.36	809.064	229.84
3124.06	801.992	251.872
3985.48	741.064	510.136
1071.14	983.688	302.056
2722.72	511.088	238.408
5046.55	445.536	352.376
2430.18	687.072	320.008
1207.27	646	252.824
288.864	2883.2	325.04
1326.41	352.784	586.976
1714.14	754.664	393.72
983.416	860.2	386.648
1588.62	735.624	207.672
3576.66	608.736	366.792
1231.34	261.664	333.88
1554.89	868.904	223.72
3394.29	756.432	602.752
936.088	1303.97	815.32
2673.08	300.56	343.264
4183.09	1024.76	219.368
4385.05	615.808	280.296
1788.67	864.96	237.864
1471.79	815.184	323.816
2109.5	1184.97	482.392
3052.79	821.168	376.584
2711.7	811.512	334.968
956.352	404.872	359.176
2868.92	1072.5	253.368
1449.49	506.872	245.752
2901.15	503.608	550.12
1672.94	357	215.424
3600.33	1333.21	499.12
1173.95	827.288	518.024
1760.11	587.112	311.168
477.904	1150.56	490.96
2490.16	642.328	247.384
1807.71	447.032	356.048
1683.54	873.8	244.528
1745.29	590.104	244.8
1546.05	1604.53	459.136
1592.97	642.328	254.048
4111.14	198.016	136.952
2316.08	418.608	331.704
1898.42	922.624	268.328
1270.38	1400.66	280.84
3622.5	564.672	574.6
3905.51	620.296	252.552
1010.89	444.312	432.752
1111.94	607.376	275.264
2567.27	401.88	317.016
1600.31	697.544	393.72
3730.75	1077.26	530.264
4490.72	1248.62	224.264
1915.29	1553.8	884.544
2235.43	484.568	442.68
3697.84	666.128	182.24
2261.41	1469.62	223.448
2601.54	427.72	561.952
2199.12	776.016	418.064
1979.07	400.52	169.864
1066.92	919.904	323.816
2787.32	747.32	219.776
3698.25	673.744	240.04
2027.9	518.84	311.168
4032.26	1038.63	461.584
2125.27	1664.78	284.24
1634.04	2688.99	292.944
1232.16	898.552	406.368
1962.21	816.408	493
2647.78	1318.93	182.512
1940.58	523.6	478.584
1110.17	1142.13	261.664
5088.58	674.696	620.976
2203.34	1691.02	399.976
1810.02	400.52	261.528
1233.25	716.448	283.152
995.248	1680.69	418.336
4713.62	1058.49	250.784
1838.18	482.392	585.616
3100.12	654.432	288.048
3236.12	620.024	272
1269.56	1846.06	342.72
2073.59	669.528	168.776
2645.74	344.352	418.608
2085.02	2299.49	295.664
3275.42	1022.31	146.88
1618.67	731.68	243.44
1496.54	600.576	246.432
2238.02	441.456	450.704
1317.16	387.328	404.192
3484.18	1200.74	264.928
2307.38	398.344	568.48
1834.1	1043.66	239.36
2832.88	682.72	244.392
1573.52	443.496	276.624
2893.81	1369.38	289.68
1319.34	520.336	339.592
1726.11	1062.57	405.144
4537.5	716.176	260.576
2075.22	852.72	368.424
2042.58	854.76	212.704
1060.39	1298.12	341.768
1975.67	916.096	406.368
1840.49	698.224	274.72
2017.02	483.616	258.264
1863.74	444.312	337.824
1121.18	869.04	329.8
1823.08	385.424	198.696
2824.18	1222.64	246.432
2198.71	920.312	218.008
1747.74	1374.28	242.488
1433.58	1056.86	314.704
1502.12	495.312	268.328
2063.26	1370.34	620.296
1752.9	755.344	212.024
870.944	711.144	304.64
1282.07	1139.95	436.016
2100.93	1841.3	176.936
1836.27	714.544	366.656
2457.93	485.52	234.6
1309.82	691.288	263.976
1324.1	1558.42	304.64
1522.79	460.904	216.784
2146.49	641.648	361.216
1416.03	671.16	750.992
2549.86	527.544	414.392
4476.58	782.272	220.592
1350.48	752.624	236.912
1948.61	2529.6	257.992
1526.6	1312.54	271.048
2015.25	827.288	311.712
1259.09	339.32	695.504
1323.69	1479	523.192
2120.78	679.864	320.552
2181.98	1299.21	184.28
1536.94	579.224	293.896
1220.33	1024.08	162.792
933.232	1293.5	251.736
1392.23	708.696	153.136
1653.76	669.664	287.096
2210	704.752	319.736
1870.54	556.376	609.008
1857.35	2367.08	231.472
1049.92	869.856	364.48
1991.58	589.832	278.256
1450.17	903.72	385.968
1819.14	826.608	330.48
2101.2	574.192	318.24
5009.83	354.824	331.16
1712.38	1303.83	274.04
1697.82	785.672	192.576
1434.8	791.792	301.104
1597.46	833.408	339.32
1004.63	1456.56	234.192
1038.36	663	148.648
2380.54	1379.99	249.696
1899.92	743.24	223.584
2018.1	436.56	230.112
979.336	800.904	156.944
2456.84	1012.38	954.584
1107.72	543.592	633.896
2142	961.52	423.368
1991.45	830.416	303.552
6161.62	364.48	182.92
1747.19	739.432	422.28
2392.51	711.552	553.928
1493.42	665.04	353.056
1967.1	540.736	328.032
7425.87	310.352	482.12
3313.91	783.36	301.104
2905.23	743.784	210.936
3516.82	604.112	344.76
1324.64	999.872	399.704
2133.7	720.936	184.688
1789.9	996.336	223.992
2263.31	554.744	356.456
1403.52	779.144	265.88
1678.51	2155.46	359.176
1897.88	1874.49	484.568
1731.28	1628.46	262.072
4248.1	691.832	397.12
855.032	927.112	144.296
3204.02	712.64	318.24
4810.73	799.272	320.96
1319.74	689.248	345.848
2292.42	472.192	523.192
1647.78	609.824	526.592
1843.34	624.24	325.04
1007.9	639.608	429.624
188.088	1162.39	221
1436.3	708.288	238.816
905.896	844.016	332.52
1996.48	759.696	871.76
1666.41	868.904	264.384
1030.61	1030.74	184.96
2697.02	787.576	321.504
2108.68	381.616	424.864
939.216	947.784	205.904
6036.22	1970.23	540.6
4353.5	2766.51	221.952
2421.07	521.152	314.16
7054.73	616.216	162.112
2942.63	311.848	209.712
2335.8	1049.65	499.664
2663.15	543.864	419.288
1152.06	1844.57	201.688
1756.98	585.072	267.92
1026.66	684.896	217.872
7194.67	594.048	161.976
1708.3	794.784	327.488
674.152	1206.73	320.688
1052.64	1168.51	325.312
2104.33	1299.89	276.624
2729.66	561.136	165.92
1912.16	817.904	307.768
1154.23	580.856	152.592
1681.78	512.312	372.776
2005.59	1219.92	261.664
1113.98	512.176	376.856
1507.15	708.152	251.328
2382.04	761.328	173.808
2332.94	948.464	286.552
2151.52	519.384	473.552
2259.37	306.952	197.608
996.608	560.456	223.448
5066.27	742.56	347.616
3371.71	603.976	311.984
1853.54	1180.62	337.144
1259.09	775.744	345.168
1323.96	468.384	457.232
2629.7	1119.55	651.44
1934.74	822.528	354.28
3707.22	797.64	279.48
8178.77	1181.84	255.136
760.376	260.44	284.376
1620.03	906.032	242.488
2000.7	607.24	249.288
1448.26	1084.6	332.656
1415.9	968.592	235.28
4932.72	1011.84	262.616
4201.04	494.088	462.808
2847.02	839.8	272.952
3015.66	1209.72	281.384
2246.18	624.104	395.08
3750.47	549.44	244.8
1417.8	1602.76	158.576
1451.39	1088.95	260.168
1973.63	1266.43	348.976
1534.08	993.072	162.928
991.848	569.976	285.736
3291.88	1384.48	181.832
1530	520.472	736.712
1846.88	612.816	198.016
2524.98	546.176	257.72
1728.83	747.456	131.92
3595.02	908.208	183.192
1404.61	539.648	165.376
1411.95	870.672	268.6
1241	1306.55	396.984
2524.7	1725.98	163.88
1575.02	2025.86	343.4
1582.5	349.928	378.488
1289.96	792.064	356.184
2533.54	761.464	180.608
2421.48	456.552	301.648
1298.39	920.176	249.424
2764.06	823.888	248.472
2946.3	1560.74	829.328
1379.31	488.784	469.88
1694.42	1469.21	291.312
1445	945.472	209.168
1893.39	693.6	173.128
1499.54	768.944	245.072
1117.38	848.096	271.32
2437.39	515.848	219.232
8617.23	719.848	459.816
1060.66	1291.05	333.336
1723.94	796.144	465.256
1216.52	480.216	256.088
2371.02	1182.79	363.392
1453.57	1119.01	252.824
1546.18	590.784	176.8
2590.53	925.072	536.384
2027.76	2519.81	344.896
2467.86	615.4	263.976
903.448	690.88	169.048
1550.26	1108.81	122.944
2275.01	978.928	346.664
1462	1393.46	440.504
1730.87	918.68	172.992
1270.38	718.488	208.08
1381.62	535.84	297.024
3425.02	1494.23	320.28
4124.74	795.328	1358.5
1604.94	1460.78	419.424
2067.2	705.296	306.272
1322.6	1286.97	267.784
917.728	730.32	306.952
3132.49	1047.2	260.576
1314.85	806.208	174.08
1769.09	944.112	268.872
1238.55	537.608	405.008
1224.54	859.112	361.08
1612.42	634.168	470.696
2049.52	1242.63	264.112
2383.81	658.104	295.8
1690.75	1512.05	228.208
1976.49	1006.81	230.52
1548.22	897.872	340
2928.9	418.608	297.84
4898.99	2816.02	287.232
1772.49	2240.46	137.088
1974.04	664.088	470.968
4465.29	884.952	320.144
2057.68	894.744	289.68
932.28	559.504	319.872
1563.18	1297.17	330.888
1379.86	696.184	259.624
2371.84	658.648	561.272
7940.22	854.352	301.104
1810.84	602.616	408.952
1024.08	2107.32	301.24
1323.28	1910.26	373.592
1440.78	719.984	625.056
2268.89	576.504	670.48
2638.67	885.36	260.304
1948.61	776.56	714.544
4913.82	1222.78	205.632
2070.33	836.4	271.048
1785.27	261.256	179.792
2646.97	784.992	249.968
2040.14	835.176	940.984
1654.44	908.072	147.968
1242.9	616.08	547.808
4110.19	765.544	267.512
1637.03	578.68	317.696
2800.38	1041.35	257.448
1445.82	888.624	737.392
1139.68	1007.22	318.784
1864.15	474.368	447.848
1414.81	626.552	175.848
1410.05	705.704	192.032
1822.94	1163.75	203.048
1465.54	536.928	221.816
2041.09	765.68	309.808
1584.13	627.232	346.8
1499.26	1805.94	200.056
1537.89	957.984	331.432
2046.8	1632.82	480.216
7978.58	517.752	257.04
1897.61	941.12	299.88
1492.19	416.976	427.04
1647.1	487.152	276.624
3127.59	785.944	251.328
1201.7	1025.98	320.008
2614.19	1001.91	306.136
1045.98	991.032	339.32
1456.7	493.272	409.496
1309.95	672.792	267.92
2227.27	513.128	243.848
5096.46	549.984	205.904
2685.32	1742.84	309.944
1438.74	692.376	199.648
4707.23	1083.78	235.824
2627.25	434.248	226.984
1552.03	496.128	273.088
2095.62	1447.99	372.504
2111.4	817.768	341.768
4298.96	693.736	292.536
1162.26	787.44	297.704
1267.93	585.752	359.584
1279.62	914.328	391.952
1685.31	2455.62	211.208
1691.02	678.776	311.576
1498.31	1012.11	652.936
1911.48	491.232	367.472
1761.06	987.904	231.064
2140.37	468.928	380.936
2079.44	444.992	195.296
1927.53	902.496	313.888
1366.8	742.016	250.784
1112.75	728.144	491.776
1153.01	396.44	208.76
1476.14	967.368	350.472
2586.58	632.536	308.992
1462.95	938.672	313.752
1903.32	644.232	183.736
2204.02	530.808	241.672
1441.06	804.032	223.04
1993.08	1080.52	412.216
1658.79	887.672	356.456
1107.18	515.304	194.072
3040.14	983.552	195.568
1099.83	535.976	282.744
2578.15	915.28	482.256
1449.62	526.864	295.12
1449.76	1043.12	262.752
1991.99	616.488	350.472
2765.29	796.96	432.616
972.4	757.52	217.872
1269.97	744.328	298.112
3179.41	810.016	369.376
1269.02	388.28	337.416
2224.01	675.92	289.272
1922.22	498.304	214.608
1127.58	516.8	517.344
1531.63	528.36	346.528
2024.5	576.368	233.24
1400.53	672.384	597.856
2290.24	609.144	156.536
3361.24	895.016	310.352
1367.89	845.92	578.816
2990.64	1855.18	613.496
2950.25	500.752	134.504
1654.71	1053.46	312.12
2487.98	378.624	173.128
5729.14	719.44	245.208
2615.69	896.92	137.088
1416.58	1123.22	517.48
1878.3	608.328	489.192
2415.22	1112.48	354.416
3130.86	1098.88	300.424
1855.04	563.312	297.024
1135.19	396.44	772.888
2105.14	632.536	542.504
1582.09	848.912	224.128
1103.37	753.576	474.232
1145.66	620.976	675.92
1358.78	960.16	404.736
1705.17	330.888	430.032
1631.73	1240.05	300.152
1722.98	770.984	180.2
2154.92	458.864	521.152
2454.94	600.168	335.24
2266.85	1065.42	139.536
1659.47	715.496	219.64
1398.35	413.032	342.72
1774.12	522.24	614.448
1371.15	1136.55	759.696
1714.14	684.08	339.184
917.592	940.032	151.776
4218.72	1306.28	286.144
1306.82	791.52	259.216
2332.67	640.968	534.616
2447.18	932.28	408.68
1416.71	1480.22	215.288
3348.46	909.976	258.944
1295.67	606.288	402.288
964.92	644.776	235.824
2053.19	519.248	249.832
1515.58	1018.23	210.8
2393.87	1133.15	388.416
1874.35	2098.34	297.84
2467.72	870.128	248.608
1582.5	1235.15	288.048
1879.93	630.904	121.856
[truncated: 16,596 more rows]
