# Supplementary material for: Repurposing the mammalian RNA-binding protein Musashi-1 as an allosteric translation repressor in bacteria
Source: eLife. 2024 Feb 16;12:RP91777. doi: 10.7554/eLife.91777 (PMC10942595; doi:10.7554/eLife.91777)
Supplement: Figure 5—source data 1. [file elife-91777-fig5-data1.xlsx]

## Sheet: fig5c
lac + & oleic +	lac + & oleic -	lac - & oleic -
680.571	767.961	1366.14
820.752	851.07	1458.52
787.579	871.759	2118.4
1050.82	482.606	1888.33
1861.23	427.319	1987.5
734.788	918.129	1709.63
1955.04	520.772	2462.25
2739.76	791.503	2557.49
1554.11	1367.56	1584.08
1507.74	549.308	1243.43
863.911	855.351	1669.68
1095.05	1292.66	3337.22
2355.96	841.083	1951.47
1290.87	747.629	3395.72
1559.11	1252.35	1686.8
536.11	743.706	2349.18
648.825	569.639	5099.29
706.253	613.869	1554.11
1991.06	590.684	1629.38
1507.39	724.088	1324.05
1482.77	916.345	2227.91
1024.78	863.198	2129.46
900.294	892.447	1290.87
2717.65	712.673	3476.33
719.807	781.872	1919.37
1039.4	863.555	1278.75
1445.68	851.427	1570.88
1105.04	519.702	1447.11
1503.46	993.034	3082.9
1041.9	1809.86	1795.24
1131.07	1142.49	3698.55
1383.97	1658.98	2042.43
782.942	580.697	1181.73
2278.91	518.276	1629.38
1652.92	740.852	2337.41
1089.34	510.072	1051.18
851.07	761.184	1156.4
1108.6	556.442	1851.24
1230.95	449.434	1936.49
986.257	1287.66	1950.04
1107.53	1597.99	1332.96
898.511	992.321	1660.41
918.129	724.088	1756.71
3687.14	944.881	2174.4
1211.69	863.198	2289.97
1137.85	1121.09	1189.93
1065.44	529.69	1010.51
2446.56	893.517	1357.22
1250.21	675.577	1119.66
618.506	558.582	1016.93
1430.7	602.455	2928.1
1009.09	465.485	2100.21
1393.96	844.293	2048.85
2089.87	2003.9	1664.33
940.957	822.178	2445.85
854.994	765.107	856.778
986.614	572.136	1375.05
1747.44	852.854	873.899
1022.28	809.337	1994.27
1093.98	1304.07	1714.98
1376.48	855.351	2282.84
1212.4	835.019	1485.27
1498.83	2729.42	2445.49
567.143	604.952	1530.21
1193.5	615.296	1339.74
792.216	1043.68	1523.79
1849.46	957.722	1841.96
1334.03	1831.98	1601.91
944.167	1085.06	2284.26
860.701	674.151	1520.94
1312.99	1684.31	1743.52
1175.66	742.636	1736.03
1204.2	535.04	1787.03
2449.77	925.976	2322.43
1023.35	538.964	3238.06
1705.71	782.585	1035.12
1657.55	879.963	968.066
1454.95	938.104	1539.13
1796.66	1359.72	1210.26
1500.25	1735.31	1553.04
1004.45	400.923	2054.91
1570.16	1107.18	2935.23
2029.23	709.82	1855.16
659.883	713.03	1472.43
1886.91	630.634	2055.62
1175.3	694.125	2489.36
1178.87	881.033	2875.31
1010.16	766.177	1493.12
3450.3	954.868	1482.06
1237.73	813.974	3213.09
881.033	869.262	1451.74
1359	587.831	2379.5
1317.63	334.222	1922.93
1090.77	801.133	2439.43
685.921	776.165	2514.69
1511.31	959.149	1889.76
517.919	1764.21	1327.61
1920.44	802.917	1894.4
784.725	362.044	1172.09
1204.2	1828.05	2072.75
1539.13	772.241	1204.55
818.255	992.321	2055.27
1563.03	882.459	1730.68
1609.4	990.538	2211.14
1052.25	404.49	1834.47
1360.43	638.481	1833.76
1132.5	836.446	1849.81
1198.13	796.14	1887.62
895.3	496.161	1735.67
3420.69	675.934	1806.65
1552.33	1280.89	1263.41
787.936	556.798	2068.82
2330.99	1052.96	2111.27
977.697	501.868	3049.73
3464.21	961.289	2234.68
1568.38	733.718	4489.34
1215.25	711.247	2191.88
1004.81	382.732	2613.14
1007.3	1118.59	1284.45
1358.29	851.784	2012.82
1545.91	552.518	3032.96
1107.18	538.607	4238.23
1512.74	793.286	2507.55
849.287	448.007	2142.3
1167.1	642.762	1653.63
736.572	938.46	2145.15
1189.93	677.004	1731.39
1365.42	1252.71	2845.34
662.023	779.375	3341.15
1413.58	1429.63	1800.23
1019.43	764.751	2044.57
2225.77	689.845	1886.55
1706.06	813.261	2037.43
1529.5	620.647	2387.35
1277.68	828.955	2453.69
1407.51	840.726	2176.9
954.868	1808.44	1450.32
1247.36	471.192	1705.35
1598.34	1498.47	1250.57
1733.89	1256.63	1674.68
746.203	1018	1020.5
930.256	761.184	1687.16
829.669	766.891	2624.55
1153.19	980.55	1916.16
1650.78	678.431	3086.82
1731.39	466.198	1116.81
1723.9	1011.58	1056.53
783.299	668.443	1610.47
1283.38	852.854	2833.93
1026.21	798.637	1639.01
1088.27	809.337	2304.6
546.811	407.344	1374.7
1205.98	795.783	1727.82
673.08	539.32	1862.65
1205.27	1082.21	2013.18
1575.87	1046.9	1833.4
1190.29	1892.62	3626.15
1281.6	1008.02	3291.92
594.965	729.081	2483.66
1498.83	738.712	1580.51
1356.51	866.408	1716.05
1548.41	746.559	1449.6
795.07	837.159	2190.81
951.658	1100.4	1476.71
1542.34	1341.88	4180.45
518.632	1663.97	1887.62
239.698	848.574	1046.54
1449.6	486.887	1550.55
1177.44	997.315	1378.26
1387.89	971.633	1812.36
1142.13	688.775	2008.9
1208.48	440.873	1391.46
771.885	645.615	2067.04
1299.43	947.021	1644
1695.01	819.681	1419.28
970.563	833.593	1105.39
1770.27	1023	1856.23
819.325	1047.25	1981.79
768.318	992.321	2802.54
927.046	757.617	1360.07
955.225	1525.22	2708.37
1670.75	713.387	3322.96
1026.56	618.863	1283.03
1162.46	1150.34	2192.59
1028.35	823.962	1820.92
659.169	604.952	2576.04
1113.6	513.995	1747.08
1490.62	962.002	2152.64
825.032	1181.37	1353.29
1370.06	893.517	2129.1
1447.82	1286.59	1478.85
934.537	694.125	1327.61
2064.9	471.905	3010.85
2896.35	882.103	1439.97
1459.95	636.698	1612.25
1965.02	506.861	1484.2
1098.62	1417.5	1721.4
3463.85	688.775	4105.18
1464.23	525.053	3105.73
1037.26	809.337	1422.85
816.471	515.422	1921.86
954.512	1018.36	1006.59
1132.86	649.182	2035.29
913.492	1502.04	1070.79
1426.42	618.15	1625.81
947.378	724.088	2160.14
766.891	970.919	2738.34
1434.62	763.324	1730.68
673.794	825.389	1036.91
1595.13	330.655	2909.55
1561.6	695.552	4725.47
931.683	709.82	1168.88
1298.36	468.338	1585.86
682.711	952.371	1271.61
1181.37	903.504	3248.05
1118.23	633.488	1789.89
805.414	795.426	1569.81
647.399	758.687	2869.96
2883.51	556.085	1897.25
599.602	755.833	1232.02
1537.71	1084.35	1324.05
634.558	604.952	1764.92
876.039	723.374	1083.28
635.984	964.142	952.371
1982.5	674.864	1471
1607.62	1010.87	2372.72
665.59	507.218	3352.92
1233.09	731.221	2178.68
1165.67	885.67	1802.02
1142.13	790.789	2699.46
849.644	1047.61	1389.32
1570.88	638.838	2914.54
863.555	458.351	1948.62
740.496	616.723	2735.84
874.612	468.695	1855.88
1009.09	762.611	1842.68
1401.45	576.773	2035.65
1144.63	726.941	2377.36
1396.81	718.024	1277.32
903.148	1033.7	2358.46
2976.25	568.926	1668.26
1396.1	790.789	1850.53
1263.05	753.693	1747.08
1326.9	487.957	2705.88
1884.77	825.032	1472.07
947.378	909.211	2137.66
1796.31	562.149	1576.58
1658.62	621.003	2217.92
1061.52	771.885	2197.59
1015.86	634.201	1349.01
1277.68	669.87	2073.1
1277.68	627.424	1706.78
691.272	813.974	1612.97
1946.48	811.477	1429.63
1183.87	683.425	2585.31
777.235	572.136	1311.2
1574.09	715.17	1770.63
1346.16	864.625	2206.86
918.486	613.513	2639.17
1029.77	956.295	2474.03
1232.02	531.116	1387.89
1014.79	822.892	1399.31
1723.19	1838.75	1596.2
1069.72	774.381	2381.64
1046.9	694.125	1906.88
1024.78	566.072	729.795
909.211	791.503	4803.59
1809.51	738.355	2075.24
1657.91	917.415	1639.01
1496.33	1066.51	2243.6
1019.43	749.413	3064.35
1293.37	789.363	1579.08
1927.57	973.416	1854.45
1238.8	694.482	1736.74
1332.25	1159.97	1743.16
1558.75	691.272	1355.08
1292.66	699.832	1901.18
980.193	656.673	1187.08
959.862	1414.29	5224.49
861.771	1254.85	2601.37
2491.86	421.968	1415.36
860.345	903.148	1884.77
1046.18	1050.46	1503.82
1274.47	630.277	1802.37
1362.21	624.213	2429.8
1658.27	2798.26	2139.45
1157.83	835.376	1552.69
672.367	569.996	1601.55
685.208	894.587	2879.59
1844.82	756.903	3683.22
974.843	637.054	2011.39
1118.23	501.868	2276.06
2018.88	747.273	2937.01
1343.31	514.709	2649.16
1499.9	609.232	1279.1
1955.75	1293.01	2404.83
1435.33	891.733	1909.74
2033.87	1122.87	1870.86
1276.96	768.318	2610.28
840.726	771.171	2130.17
1029.42	975.2	2940.58
1038.33	567.856	3462.78
1695.01	588.187	2654.87
486.53	1279.46	1185.65
1277.32	927.046	2219.35
1543.41	744.776	1203.48
779.018	1182.44	1765.63
1060.81	633.844	2146.94
1021.21	974.843	1924.72
745.133	994.818	2346.69
770.101	695.909	1611.54
1638.29	998.742	1656.48
726.941	1520.94	2190.81
1786.32	526.836	4136.57
916.702	558.225	2004.97
1307.28	1046.9	1846.6
540.747	382.732	2062.4
1980.72	539.677	2494.36
2787.56	1242.01	1659.69
1007.66	951.301	1551.97
1112.88	1140.35	2594.59
749.413	638.838	3621.86
1443.54	925.619	1668.26
1029.42	812.548	2158.71
1661.12	435.523	1712.49
1084.35	949.518	1779.9
1370.06	518.989	1594.42
1089.7	813.618	2912.76
1117.88	825.389	1925.79
1417.14	794.713	2105.2
1014.79	1010.51	1872.64
890.307	607.449	1244.86
1381.47	558.225	1707.85
859.631	545.384	1268.76
1308.35	1649.35	2193.31
781.872	1055.46	2364.88
807.911	631.704	4582.8
2304.24	753.336	1816.64
760.827	759.757	2319.93
1154.97	660.953	2517.54
932.753	1020.14	2583.53
866.052	695.195	2055.27
1963.24	675.934	1421.78
1560.53	1009.8	1839.82
1002.67	1248.43	2110.2
890.663	498.301	1914.02
1337.6	1172.45	2297.46
1367.92	1204.91	1436.76
1350.08	1441.75	2028.87
929.186	654.532	4290.31
1290.52	450.147	1258.06
884.956	737.285	1926.5
1734.24	616.366	1849.1
1258.77	586.404	2361.67
1025.14	873.185	2706.95
1224.53	533.257	2310.3
1197.78	765.464	1646.5
829.669	593.181	2003.9
729.795	902.078	2204.01
1649.35	833.949	1762.42
1793.1	739.425	1359.36
1492.41	713.744	1419.64
1767.42	1219.53	2362.38
1273.75	1099.69	2137.66
998.028	659.883	2375.93
1768.84	607.449	3225.94
2901.34	1072.22	2014.6
1937.56	685.565	1657.2
1575.51	548.951	2128.39
1479.21	576.773	1811.29
912.778	1053.67	2801.11
1519.87	565.002	3025.47
1276.96	1040.12	1686.8
2156.57	742.279	1335.1
1402.52	826.102	1924.36
1772.77	1485.63	2900.63
1545.91	703.043	1076.86
1070.44	554.658	2825.73
654.889	1499.18	2527.53
1169.6	918.842	1891.9
1247.71	554.302	1293.01
1244.5	992.321	2018.53
1054.39	1218.46	1550.9
1335.82	654.532	2260.37
1130	932.04	3415.34
1218.11	854.281	1922.93
1562.67	576.06	1833.76
1601.2	709.463	1522.72
977.697	856.064	1687.52
1452.46	2167.27	1894.76
1550.9	488.313	2164.42
688.418	831.096	2698.39
1345.09	892.447	3276.59
1280.17	742.279	1493.48
1563.03	698.049	1804.87
1011.58	612.086	2837.14
2277.13	863.555	1607.26
1364	995.175	2324.21
890.663	931.327	1501.32
1025.49	1259.48	1542.7
1232.73	744.776	2001.76
959.862	816.115	2584.96
1450.67	987.684	2278.56
1783.82	613.513	1869.79
952.371	426.962	2699.81
982.69	362.757	1850.88
1484.91	517.205	1851.24
1279.82	1538.78	1415.36
1188.86	635.271	1548.05
1613.32	640.265	1890.83
1221.67	383.445	1737.45
959.505	959.505	2206.51
2628.83	566.429	1958.96
2026.02	820.752	2236.47
1125.37	1118.59	1411.44
1240.94	701.973	1660.76
1042.61	759.044	2618.49
816.828	889.95	1661.48
1124.65	663.45	2570.69
2216.85	770.101	1597.27
1005.88	462.988	1966.81
1359.36	812.191	2026.02
1017.29	1314.77	3485.96
1004.81	785.082	2229.69
1751.36	1032.27	1494.19
1720.69	719.094	1749.22
1401.45	670.227	3406.07
713.387	667.373	1348.3
3438.52	673.08	2338.84
1066.16	868.192	2089.51
1904.39	540.034	984.831
1418.93	826.459	2864.96
792.216	648.112	1189.93
1304.43	759.044	1811.29
1656.13	448.007	2822.16
1372.91	953.441	2250.38
1520.23	864.981	1908.31
969.136	635.271	1439.61
723.374	441.23	1468.15
1198.13	1087.56	6549.25
892.804	727.298	1036.91
1820.21	933.11	1224.89
1271.97	652.392	1947.9
1863.37	688.062	2197.59
1581.94	691.272	2243.96
1136.78	450.147	4420.86
1531.64	1276.61	1773.48
1255.2	863.555	2474.38
871.402	631.347	1617.6
907.428	548.951	2251.81
926.689	734.075	1953.25
1698.93	1272.33	1762.42
1278.03	1015.86	2540.01
1078.28	1022.28	1473.86
2087.73	746.916	1826.98
1238.08	454.071	2564.63
1107.53	622.073	2507.55
709.82	1271.61	1314.06
811.477	719.094	2487.22
1422.14	689.845	1631.52
970.919	632.061	1642.57
1364.71	1042.97	1571.95
1329.4	596.035	2118.76
949.875	655.959	2483.3
1904.39	1648.28	1469.93
1279.1	720.877	3084.33
684.495	454.071	1773.48
2993.01	1721.05	4003.88
1613.68	467.268	1494.19
945.594	1072.93	2033.51
1620.1	839.656	1227.74
3044.73	839.3	1900.82
1250.57	507.575	1616.18
1437.83	951.301	2421.23
1463.87	591.398	2426.59
970.563	845.363	1973.58
1584.08	935.25	1098.26
1009.44	1382.9	3477.76
821.108	681.284	1745.66
1430.34	730.508	1895.11
696.979	909.925	2820.02
1033.34	1017.65	2038.5
2461.18	946.664	1784.18
888.523	969.849	1476
1213.83	774.381	2643.81
1477.42	755.833	2243.24
903.148	867.122	2130.17
1437.12	587.474	1255.92
824.318	960.932	1288.73
1530.93	1279.1	2485.44
1205.27	513.282	2770.44
2165.13	1067.23	1607.97
2445.13	1029.42	1011.23
1512.74	975.557	2812.17
1390.03	501.511	1279.82
1104.68	781.159	1896.9
1677.53	652.749	792.573
1109.67	540.747	1451.39
899.937	662.023	1775.98
1041.19	1139.99	1582.65
1535.57	540.391	1176.02
2014.6	497.587	2603.15
2116.62	438.02	1455.31
1201.7	506.148	1461.73
1819.85	1261.62	1737.81
1432.84	698.406	1605.48
1370.06	1086.84	2806.82
716.24	456.924	4469.37
1294.08	837.159	2308.16
1160.68	634.201	2527.89
1218.46	502.581	2189.03
772.241	967.353	2087.01
1329.75	640.265	1561.25
1666.83	1072.58	2343.12
1089.7	1108.96	1376.84
1231.31	733.362	1621.53
653.819	626.354	1444.97
3090.75	572.493	2724.42
1675.39	533.97	1574.09
885.67	860.345	2067.75
993.748	528.976	1796.31
1264.12	2192.59	1136.78
1263.76	314.604	2761.52
1043.33	1034.77	1655.77
1324.76	345.636	2178.68
3072.2	1121.09	2972.68
1134.29	971.276	1823.42
1049.75	917.772	1949.33
948.805	1276.25	1594.06
1334.75	496.517	1165.32
1325.12	1274.47	1845.89
937.747	840.013	1918.65
1113.6	478.683	2235.04
2052.77	770.458	2266.43
595.678	640.978	1846.6
1736.74	664.877	1740.66
1802.73	749.77	1086.49
2143.01	616.723	3027.61
1395.38	1064.37	2835.71
1128.58	622.787	2348.83
1180.3	754.407	1136.07
1455.31	511.855	2287.47
2793.62	1725.33	2068.11
882.459	852.854	1162.46
945.594	1040.47	2075.6
511.498	728.368	1117.52
579.27	558.939	1792.74
1360.07	2656.3	1780.97
1874.78	757.26	1784.89
1191.71	585.691	1257.7
1002.31	659.526	2344.19
1618.32	662.023	1277.32
1356.15	971.633	1675.39
1831.26	1854.45	2616.35
868.192	985.187	4365.21
1518.09	992.678	1327.26
2287.12	719.094	2658.44
1508.46	797.923	1615.82
767.961	975.2	1467.44
1368.63	444.083	1020.14
1007.3	1299.43	1914.02
1420.35	1017.29	1277.32
1121.09	421.255	2938.44
1253.06	745.133	1900.11
1042.26	975.557	1555.54
568.569	993.034	2077.74
2725.49	1557.32	2988.73
1573.37	815.401	1344.73
1342.24	849.287	2317.79
1119.66	1433.19	1698.57
1466.01	561.435	2231.12
2761.52	687.705	2460.83
1482.42	1698.57	1705.71
897.084	465.485	2479.73
921.696	613.869	1657.91
828.242	699.832	1344.02
1148.91	759.4	1634.73
1000.53	1164.6	1681.81
684.495	762.611	2158
1772.77	699.832	1400.38
1073.65	752.266	3563.01
1892.26	850.357	2068.11
925.619	789.363	1207.05
541.817	562.149	2150.86
1510.6	712.673	1757.43
933.823	954.512	1634.37
987.327	712.673	1168.17
1104.68	420.185	1552.69
942.384	365.254	1166.03
1850.17	1184.94	1064.73
1144.63	678.431	2914.54
3490.6	1135.36	1877.63
1946.83	565.716	2469.39
1261.27	816.828	1933.63
1019.07	1092.55	1213.11
1500.97	443.37	4785.04
2124.47	495.447	1289.45
898.511	693.412	1553.76
1171.74	798.637	1700.71
2271.42	1758.5	2672.7
1877.99	795.07	4994.78
2476.17	947.378	1744.23
997.315	591.398	1837.68
1229.17	664.877	1532.71
1881.2	702.329	3655.75
1497.4	359.547	5203.44
1874.07	504.721	2139.8
945.951	1744.94	1824.84
982.334	400.923	2339.91
666.303	772.955	2064.9
1585.86	511.142	2139.45
870.332	451.217	3160.66
1518.44	803.274	1753.5
1021.93	557.868	1545.91
1417.86	1625.81	1469.93
2857.83	726.941	2542.15
1666.47	511.855	1295.87
1341.88	1408.58	3001.57
689.845	409.484	3396.79
998.385	1000.88	3047.59
1057.6	754.763	1509.17
1931.14	682.354	1865.15
1291.23	553.588	1807.72
783.299	800.777	1520.23
932.04	691.629	1354.72
576.06	1145.34	2526.46
1341.88	782.942	1982.86
1478.14	596.035	1615.82
756.547	551.091	1777.4
566.072	1122.51	1017.29
1158.54	618.15	4096.62
3361.84	575.346	1825.91
1069.01	942.027	2149.08
1047.97	722.661	1446.04
866.052	1522.37	790.076
1661.48	525.409	1756.36
769.031	794.356	2640.96
1011.23	638.838	2484.01
933.823	844.293	1343.31
1240.22	786.152	2391.63
1993.92	565.002	2081.66
1631.52	700.903	1281.6
927.403	994.105	1655.77
1422.14	842.153	812.191
1070.79	775.808	1945.05
856.778	911.708	3650.76
1338.67	676.647	2776.86
1337.24	561.435	4425.5
1349.01	796.14	1278.75
1913.3	733.362	1792.03
1220.6	586.761	2772.22
256.819	754.05	2319.93
920.269	399.14	1127.15
1699.29	1244.86	1591.57
2368.8	595.678	1436.05
764.037	938.817	1712.13
1966.09	950.588	4879.57
1177.8	862.128	1559.46
708.036	1138.21	1731.75
982.69	993.034	2379.15
1651.85	978.053	1250.92
1891.19	394.503	1517.37
988.397	835.019	1936.85
672.724	741.209	1910.09
1515.23	686.278	1144.63
1864.79	430.172	2117.33
1586.93	463.345	2537.52
1606.55	1481.35	1817.35
2053.84	653.106	2634.18
2027.09	1512.02	2759.74
1773.48	1189.22	2072.39
634.558	706.966	1783.82
964.142	634.558	1595.13
1335.46	655.959	2077.74
1642.22	883.886	2696.96
957.722	767.604	1887.98
1172.45	524.696	1180.66
1249.85	790.789	2003.55
1300.15	622.43	1113.95
2239.68	768.674	2814.31
852.497	477.612	1279.1
1854.81	949.518	1374.7
658.456	915.632	1134.29
1290.87	694.839	2227.55
704.113	830.026	2124.47
828.242	913.135	1346.87
1491.69	723.731	1565.17
816.828	545.028	3184.56
1473.5	960.575	1944.69
887.097	990.538	1408.23
374.528	606.735	1227.74
494.377	539.677	1994.63
856.064	332.082	1127.86
806.127	762.967	1545.55
627.424	658.099	2182.96
686.635	747.629	3242.7
1413.58	664.877	1223.46
1918.65	1014.79	1579.8
2247.53	921.696	1604.76
832.522	720.164	1091.13
987.327	673.08	1687.52
1044.04	826.815	1645.78
1574.44	468.695	6373.04
1030.13	655.602	1856.95
1424.28	935.607	1742.8
1657.55	389.509	2016.03
1124.3	562.149	2202.58
964.856	470.479	1326.9
1489.55	811.121	2609.93
812.191	703.043	1502.39
1638.29	1315.13	3740.64
1280.53	836.803	2340.27
937.747	876.039	1822.7
1103.97	713.744	2313.16
1417.86	903.861	2463.32
2784.71	2380.93	2128.75
1763.85	779.732	1714.27
1702.5	678.431	1449.6
710.177	717.667	2090.94
1262.69	1042.97	1552.33
1159.25	842.867	1769.56
1931.14	985.187	2294.97
1786.32	715.884	1829.84
1299.79	746.916	2720.5
912.778	581.41	2884.22
2389.49	1001.24	1508.1
907.785	1605.48	2688.75
1677.53	551.091	3581.92
896.727	766.177	2027.09
825.389	567.856	1307.28
1832.33	796.496	2052.77
1305.14	1494.19	1601.91
339.929	572.85	1940.77
1269.83	925.619	1247.71
970.206	707.323	2004.26
1275.54	1018.72	2054.55
1385.4	1071.86	1016.58
2067.39	525.409	2386.64
627.78	778.662	1663.97
1661.12	608.162	4601.35
1369.35	504.364	1564.46
1729.96	848.93	1156.76
1814.86	767.248	2330.28
843.223	771.171	948.448
1123.23	639.195	1754.57
1248.43	752.266	2268.21
1453.53	505.435	2003.9
1534.14	1192.07	2239.32
1329.4	906.358	3088.96
993.034	772.598	1420.35
703.756	782.229	1011.94
1092.91	759.4	1749.22
1130.72	653.462	1762.07
1290.16	734.432	2195.8
659.169	1297.29	1372.91
1520.58	503.294	2938.44
1056.53	340.642	1492.76
1122.87	1417.86	3801.28
583.194	844.65	1182.44
1255.92	1011.94	1054.39
2339.91	893.874	1963.6
1355.43	667.017	895.657
1016.58	855.351	1104.68
968.066	436.593	2593.87
850.714	921.339	1199.56
1346.16	2776.86	2414.81
1711.41	862.485	1399.31
1905.46	527.193	2796.12
1580.51	881.033	2154.78
1081.14	569.639	1553.04
1299.08	771.528	1182.44
1824.13	1936.49	4383.41
1489.91	492.594	1601.2
1283.03	745.846	1345.09
1331.54	1311.92	1183.87
1288.02	856.064	1714.27
1077.57	1015.51	1379.69
1065.09	775.095	2074.89
2277.84	622.787	1297.29
1989.99	537.894	1653.27
1186.01	770.458	2181.89
1724.61	994.461	3268.74
963.072	1092.91	2010.32
963.429	802.917	1509.17
3427.82	789.363	842.51
1259.13	699.476	2283.19
824.675	1067.94	1810.93
683.781	574.99	1366.49
721.947	708.75	990.894
724.801	512.568	3604.03
1276.25	762.967	1966.09
1486.34	731.221	3195.62
698.406	868.192	3092.53
2026.02	760.114	1268.76
1107.53	1130.36	1437.12
1707.49	747.629	1760.28
2059.55	686.635	2324.21
1170.67	733.718	1205.98
1987.14	489.027	1922.93
1237.01	813.974	2144.44
1344.73	709.106	3845.51
1085.42	650.609	2383.78
822.178	1207.41	2466.18
1118.59	600.315	1624.74
906.001	1008.73	1481.7
938.46	496.874	1454.6
746.916	569.996	1534.85
1343.66	804.7	5173.84
1657.91	452.287	2334.2
555.728	943.454	2227.55
782.585	797.566	1141.06
993.748	965.569	2370.94
1282.31	604.952	1270.9
2547.5	1048.32	3554.09
1561.25	525.409	2009.25
806.841	828.242	1834.83
1569.09	738.712	1891.9
621.36	1196.35	2150.15
1539.85	793.286	1875.49
1146.41	598.175	1793.45
1420.35	1095.41	1527
1148.2	628.494	2145.87
1585.5	350.63	1248.43
1296.22	747.273	1827.34
1393.6	982.69	3327.24
1346.16	332.795	1947.9
944.524	802.203	2276.42
1496.33	361.687	1310.85
706.966	704.826	2649.88
905.288	480.823	1702.85
996.601	330.655	1273.75
1532.35	555.372	918.486
1700	640.978	1997.48
1477.07	804.344	1498.83
1148.55	590.684	1304.07
1130.72	1156.4	1921.51
1617.96	446.58	2269.28
944.881	660.953	2217.92
1040.83	417.688	901.008
2214	994.105	2794.34
1122.87	611.016	1757.07
1411.44	1031.56	2292.83
1375.05	492.594	2099.14
1322.62	857.491	2043.5
1600.48	1137.5	1067.58
1004.09	1707.49	1514.16
1556.61	926.689	2149.79
1140.71	495.447	1346.87
1528.43	1079.35	1977.51
899.224	856.421	3029.4
1099.69	632.417	2627.76
1643.29	1102.18	1601.55
564.289	954.155	2183.68
895.657	628.137	2727.63
1050.82	924.193	2097.71
1234.16	1565.88	2326.71
1951.83	678.788	1501.32
805.77	904.931	2440.85
1325.47	962.715	2094.86
1209.55	776.878	1815.57
1214.18	870.689	2021.38
1255.2	888.167	1452.1
1818.78	707.68	1197.42
1244.5	802.917	1543.77
1229.52	955.225	2176.9
1032.27	525.409	4730.47
1480.99	871.759	996.958
1767.77	436.593	1563.74
1175.66	1068.65	1830.55
940.601	1214.18	2403.76
892.09	1867.29	1456.02
1232.73	917.059	2356.32
1172.81	795.426	3261.6
1065.8	782.585	1444.61
614.226	835.376	1193.14
1905.46	669.514	2730.13
969.849	774.738	1320.48
1824.84	595.321	2070.96
612.443	525.053	1596.2
1117.52	900.651	2503.63
1620.46	517.919	3026.54
1472.79	454.427	1514.16
1258.77	499.371	2557.49
885.67	608.876	1031.56
860.345	555.372	5129.96
1324.4	1188.86	1405.37
701.973	481.893	1691.44
1463.51	815.044	2286.76
780.445	631.347	2366.66
1634.37	587.117	1943.98
702.686	1287.31	2216.49
959.505	501.868	1644.36
1656.84	498.301	2487.58
1117.52	632.417	1416.43
1858.37	1256.99	1668.97
1553.4	890.663	2608.5
1455.67	576.773	1617.96
1147.48	1317.98	3131.41
1218.82	434.809	3309.76
1124.65	847.504	1867.65
985.901	877.109	1410.37
986.971	642.405	2092.01
1110.39	571.066	2713.01
740.139	841.083	2026.73
2884.22	1000.88	1418.57
1345.45	1363.28	2721.57
2260.37	397	2858.18
1031.91	724.801	1831.62
1758.86	831.452	1548.76
1322.26	608.162	2215.78
1365.42	1290.87	1228.1
734.432	860.701	1968.23
1283.03	415.905	3236.28
702.686	896.014	2736.2
864.981	1625.45	3549.46
1792.74	885.67	1741.02
1512.02	837.873	2223.98
1256.63	641.691	2411.6
1397.17	824.675	775.808
1003.38	1214.54	1391.1
1253.78	657.743	1232.38
1120.02	389.153	1810.93
1415	981.62	1138.21
534.327	811.121	2150.86
1245.93	407.344	1696.79
1286.24	1031.56	6052.73
2103.78	627.78	3630.43
1251.99	568.926	2825.37
685.921	701.973	1921.51
1551.97	956.652	2056.34
492.95	1005.88	1022.64
701.616	580.697	1681.81
1629.02	728.368	1727.82
1097.9	564.289	904.575
2660.58	1052.96	1393.96
1208.83	806.484	1743.16
1304.78	461.918	1890.83
3052.23	766.891	2498.28
1459.59	789.719	1482.77
1763.49	865.338	1732.1
1573.37	628.85	1589.43
953.798	1328.68	2282.48
1255.92	1170.31	1722.83
1332.25	691.272	1193.5
1520.94	592.111	3094.67
726.584	800.777	2016.03
418.758	540.747	1996.77
3214.52	812.191	1620.1
844.65	1234.16	1185.29
616.01	767.248	3804.49
1750.29	529.69	1453.88
1120.37	1507.39	1339.38
994.818	605.309	1693.58
1931.85	1000.88	931.683
1496.69	765.821	1962.17
914.919	607.449	2666.64
1199.2	806.127	2230.05
1807.37	660.953	1524.15
1437.12	1057.6	1906.17
1551.62	622.43	1740.66
1027.99	705.183	1557.32
1215.97	690.202	1212.04
1141.06	488.67	1501.68
1515.95	650.252	1844.46
880.676	674.864	1761.71
1850.53	1030.84	1933.28
1350.44	616.366	1397.17
845.72	667.373	2793.62
749.413	614.226	2455.83
744.062	1079.35	2028.16
1248.07	714.1	3528.41
1815.21	709.106	3108.58
821.108	823.962	910.638
1129.29	428.032	2498.64
1258.41	1146.06	1795.95
1204.55	1079	1315.84
2974.82	703.399	3132.84
538.964	598.532	1358.29
908.855	1441.4	1577.65
1489.91	620.647	2176.9
2302.81	490.81	1770.63
1197.42	850	1398.24
1696.08	567.499	2099.14
1398.95	497.587	2095.22
1866.58	611.372	1785.96
849.287	1198.13	1742.8
546.098	636.341	2322.79
1263.41	440.873	1155.33
1397.17	2544.29	1527.72
1879.42	451.931	1470.65
945.951	525.409	1964.67
942.027	606.379	2135.52
1791.31	1465.3	2070.25
1542.7	749.413	2633.82
1807.01	805.77	2727.63
1266.26	1135	1949.33
2261.44	725.514	1160.32
1165.32	1321.91	1820.21
1581.22	371.675	1955.75
900.651	856.421	1702.5
980.907	670.584	1580.51
1306.57	1069.01	1595.13
1310.13	1145.34	1400.02
2466.89	565.716	2029.59
1990.71	646.328	1878.7
953.798	588.901	1590.14
1187.79	614.583	1437.47
1536.99	642.762	1838.75
1627.95	687.705	2529.31
1159.25	890.663	1183.87
1742.45	1074	2089.15
1158.9	657.386	2198.66
1468.51	1059.74	1682.52
1371.84	1079.71	1607.62
572.493	386.656	2907.05
498.657	552.518	1986.07
1081.49	485.103	1888.69
2385.21	500.084	1300.86
1182.08	887.097	1620.1
1486.34	566.786	2358.1
1113.6	540.391	3744.21
2089.87	541.104	1985
793.643	673.437	2277.13
1250.57	701.616	1865.15
968.066	819.681	1863.72
817.898	710.89	2042.43
1563.74	1656.13	966.282
1690.37	1002.31	3287.64
1671.47	1098.97	1569.45
1329.04	1172.45	1964.67
2071.32	558.939	4263.91
945.594	1255.92	1302.64
2034.22	1386.82	1585.86
1237.01	800.42	1546.27
828.599	840.37	1942.91
1337.24	632.417	1722.12
1316.91	1053.32	1080.42
1328.33	505.078	1786.32
863.198	1031.91	2226.48
1318.7	660.953	1629.73
3147.46	1133.93	3137.83
705.54	580.697	1363.64
1329.04	454.427	725.158
1381.47	718.024	2068.47
791.503	661.666	1960.74
1973.23	863.911	1314.77
1584.79	686.278	1772.05
1341.88	1143.92	1345.45
2286.4	649.182	1789.53
661.666	1049.04	2653.8
1290.52	663.093	1702.85
759.757	704.826	2108.41
1422.85	597.818	3244.13
1194.92	510.785	2329.92
673.794	817.541	1972.87
1380.05	988.754	2522.54
1391.46	736.929	1978.22
944.524	1150.34	2591.02
1773.12	691.272	2173.33
1021.57	799.707	1599.41
693.412	601.742	2243.24
848.574	698.049	1971.44
1209.19	637.768	1532.71
1142.49	714.1	4730.47
1689.3	795.426	1653.63
1094.34	954.868	1100.04
1004.09	515.779	1099.69
704.113	1010.51	1715.34
910.638	668.8	1286.24
1415.36	657.029	1595.13
1172.81	958.079	1248.43
812.904	341.356	2104.85
1675.75	1145.34	1514.52
887.097	728.011	1976.08
1359.36	675.221	2271.78
1388.96	619.933	2314.23
807.554	605.665	2223.63
1097.19	698.406	1785.96
1231.66	779.732	1644
1767.06	1090.06	1609.76
1183.15	970.919	1209.55
987.684	607.092	1930.78
2508.62	1077.93	1859.44
1683.95	603.169	3261.25
996.601	898.154	2073.1
2920.25	764.037	2445.85
1236.66	1203.84	2031.01
1453.17	510.428	1029.42
689.488	570.353	2167.98
1307.64	812.191	2046.35
982.69	795.07	1159.25
1630.8	613.156	1373.27
883.53	668.087	2003.19
1289.09	1016.58	2304.95
1034.05	1072.22	3731.01
973.773	729.795	1879.77
2511.84	2076.31	2591.73
681.641	962.002	1164.25
961.645	542.174	1475.64
1507.74	1100.4	1787.39
854.637	642.405	1647.92
1258.06	641.691	4384.83
2372.01	957.365	1733.17
1378.62	808.981	1559.46
1371.84	569.283	2906.34
885.313	763.681	925.976
1010.51	1399.31	1482.42
1037.62	778.305	1555.54
989.111	859.631	1512.02
775.451	914.205	1835.9
846.79	635.984	1887.62
1444.61	808.267	1269.12
1201.7	601.385	1607.97
1276.96	1060.45	2421.23
1110.74	1161.39	950.231
2090.22	733.005	2755.1
1232.73	798.28	1622.6
1306.92	644.902	2697.32
735.502	497.944	1658.98
2701.24	831.096	2050.63
1064.73	591.754	2014.96
1404.3	728.368	2439.07
1647.57	664.52	2026.73
1088.27	574.276	1171.74
381.305	571.78	3236.99
1549.12	482.606	1658.62
1457.09	1006.95	1574.8
960.219	934.893	2168.7
1136.07	841.083	1992.13
940.601	782.585	2284.98
871.045	697.692	1543.77
802.203	950.588	1819.14
944.881	550.021	2182.61
1505.25	708.393	2403.4
719.094	868.548	1848.74
2577.82	733.005	1654.34
1127.86	545.028	1552.69
1424.28	611.729	2227.91
1533.42	1033.7	1580.51
1292.66	789.363	1216.32
1289.45	691.272	1745.3
1279.46	749.413	2299.96
1277.32	721.947	3212.74
1702.85	441.586	2242.53
1024.78	550.735	1380.4
681.284	764.751	3344.36
656.316	775.095	2063.47
1106.46	645.615	916.702
1200.27	510.785	2664.5
1691.08	638.124	2705.52
1804.87	468.338	1960.39
1101.83	758.687	2628.47
1823.42	568.926	1699.29
1408.58	528.263	1691.08
915.275	696.266	1402.52
950.945	949.875	1374.34
720.877	1118.23	4096.27
1941.84	623.5	1894.76
1384.33	564.646	2165.84
2320.65	912.065	2058.83
1538.06	668.087	3001.22
1368.99	761.184	1671.47
1892.26	801.847	3057.93
964.142	511.498	2900.63
1581.22	665.59	2323.5
1039.4	654.176	3493.81
1027.63	804.7	1803.8
752.623	505.791	1925.79
1328.33	1451.03	1586.22
1028.35	762.967	2983.74
1220.25	719.807	2216.49
1195.28	443.37	2403.04
1152.83	1529.86	3805.92
1146.77	649.539	2450.48
1443.54	824.675	2131.24
2262.15	1292.66	2584.96
1376.12	571.423	1838.75
1338.67	631.704	1607.62
1006.23	1017.29	2649.52
1258.41	831.452	4368.42
1111.1	571.78	1980.72
1612.61	2367.37	1867.29
1334.75	655.246	822.535
3015.84	826.102	1829.84
1132.5	817.185	1840.18
1199.2	373.815	1365.78
1015.51	864.268	2941.65
1405.37	507.575	1457.81
976.27	923.836	1487.41
1008.02	611.016	3072.2
1076.5	503.651	2023.17
999.098	817.898	1354.01
1212.4	1522.37	1912.95
1608.69	1004.81	1694.29
1327.61	1099.33	1110.03
2243.6	1359.36	1864.44
1639.01	980.907	2088.08
2060.97	765.821	2892.78
1143.92	563.219	1825.2
937.747	778.305	1486.7
1162.46	428.745	2088.44
761.184	484.746	1414.29
1184.94	484.033	4325.26
1540.92	763.324	1564.46
1323.33	642.762	1728.89
833.236	365.967	1439.26
1229.52	660.596	1806.65
619.933	1352.22	2964.84
2882.8	725.514	2341.34
1160.68	1200.99	1737.1
1586.93	1142.13	2744.4
1185.29	1003.74	1553.76
981.62	849.644	1547.69
1812.72	490.81	2295.68
1644.36	853.924	3632.57
1057.24	1112.53	3164.23
826.459	1010.51	2185.82
1558.04	666.66	2077.74
486.887	508.645	2639.89
1298.72	836.446	2582.82
1644	1151.76	1436.4
1254.85	505.791	1498.11
1103.61	937.747	2725.85
858.204	691.272	2517.19
3038.31	1352.22	2533.95
887.81	889.593	999.098
738.355	941.671	1477.78
549.665	3014.42	1547.34
944.881	1125.72	1264.12
1293.73	904.575	1446.04
2739.41	774.381	1492.76
1073.65	670.584	1612.97
915.275	555.728	2056.69
1484.2	1080.78	1740.66
999.455	650.609	3668.59
1821.99	893.517	2912.76
1145.7	987.327	1936.13
2991.23	508.645	2229.33
1075.07	716.597	1948.97
476.186	536.824	1853.02
667.373	1416.43	1320.48
859.631	1350.44	1814.5
1814.86	1087.56	2832.15
1586.93	632.061	2032.08
1439.26	555.728	1553.76
911.352	1442.11	1509.88
936.32	1767.42	1034.05
1187.79	1083.63	2177.97
749.413	811.477	1136.78
1077.21	1012.65	1091.13
1175.3	963.429	1715.34
1340.81	1145.34	2385.57
1696.43	623.857	1890.83
1938.27	406.274	2935.94
1112.88	1018.72	1233.8
837.873	516.135	2587.45
1384.33	733.005	1517.73
766.891	943.454	2630.26
1510.24	945.594	1751.72
2444.42	782.229	1743.87
1326.54	827.885	2607.07
1184.94	470.479	2217.92
608.876	726.228	1361.14
948.448	1145.34	1924.72
1334.75	753.336	1135.36
1312.63	789.006	2425.16
1104.68	681.641	1711.06
1585.5	515.779	1779.54
1337.6	628.494	2373.08
1619.74	486.887	1748.87
1770.27	719.451	2520.75
2026.02	518.276	1668.97
1047.97	1599.77	1819.49
892.447	750.84	3104.66
807.554	912.778	1339.74
1038.69	519.346	2063.11
1414.65	573.563	1036.19
847.86	648.469	1412.86
1299.08	735.859	1692.51
2084.87	782.942	1945.76
1487.77	1311.92	2400.55
1180.66	634.558	1211.33
673.08	541.817	1327.97
767.961	857.491	1785.96
1490.27	611.729	1576.94
1739.95	693.055	2750.46
1100.76	684.138	1891.55
1122.16	528.62	1758.5
945.238	864.268	732.648
1131.79	1033.7	1136.78
963.429	1157.83	1551.62
1061.88	515.065	2186.17
1394.67	650.252	1664.69
1515.23	603.169	1754.22
783.655	571.78	1361.14
2138.02	681.641	1340.45
1229.17	515.065	2040.29
1127.51	929.9	2210.43
736.929	975.2	1805.94
1390.39	617.08	2138.73
1343.31	774.025	1273.04
1291.59	545.741	1993.56
846.077	655.602	1876.92
1041.9	1124.3	1288.73
1496.69	822.535	1478.49
976.983	621.717	1392.89
1762.07	772.241	1637.58
740.852	795.426	1701.78
1730.32	1339.38	2921.68
1732.82	1247	1161.39
882.459	475.829	888.523
2721.21	854.637	1598.34
1295.51	530.76	2064.9
1503.46	965.926	1444.97
764.037	791.146	2139.8
1424.99	439.446	2810.39
1051.18	934.18	1905.81
1495.97	775.095	1527.36
1812.72	599.602	990.894
553.231	485.816	1705.71
961.645	982.69	1916.16
855.707	881.746	1601.55
1131.07	660.24	1836.61
1765.63	1147.48	1394.67
720.877	728.011	1938.27
1032.98	936.677	4147.63
1502.39	500.798	2729.06
1045.47	764.394	2118.4
3259.46	479.396	1243.08
1379.69	994.461	1355.43
1757.07	1541.27	1610.11
930.97	824.675	1097.9
1793.81	375.598	1510.95
928.83	433.026	1287.31
738.712	418.401	2822.87
2736.91	630.634	2974.47
603.169	711.603	1227.74
1968.59	619.22	905.645
1898.32	635.984	1631.87
652.036	1480.28	1646.14
1476.35	831.809	2123.04
607.806	507.575	2253.59
984.117	704.826	2453.34
1230.59	438.733	2770.08
1435.33	891.02	2031.73
1020.86	1256.99	1795.95
1441.4	1089.34	1622.95
1296.22	845.007	1994.27
869.975	690.915	1703.92
1271.61	744.419	1957.18
986.614	707.68	1695.01
1050.46	398.427	1970.37
818.611	1515.59	1117.88
1254.49	666.303	1131.07
1759.57	634.201	1586.22
1620.46	569.996	1694.29
1260.2	1670.4	1177.09
736.929	816.828	1663.97
983.404	672.01	1687.87
847.147	775.808	1708.2
2735.13	569.996	1865.51
1530.93	649.182	2049.56
1238.44	667.73	2110.55
1044.4	776.878	1706.78
1110.03	767.961	1446.04
1359.72	798.28	1494.9
1214.54	742.636	1528.79
1293.01	586.761	3523.06
1287.31	768.318	1604.41
1040.47	2287.47	1547.34
1635.44	601.742	1716.77
1374.7	358.12	1831.26
1523.44	833.236	1459.95
1387.18	1213.47	1967.88
1123.94	1423.92	1471.36
1820.92	749.413	2354.89
1112.88	575.346	5444.92
1517.02	1333.32	1942.91
635.984	855.707	1886.91
847.504	1204.2	2309.59
817.185	619.576	2102.35
1152.12	494.02	2341.69
813.618	1549.48	2206.51
738.712	720.164	2712.3
1139.99	957.365	1787.39
1408.23	487.243	2523.96
1191	906.001	1515.23
655.246	1122.51	1242.36
1417.86	1052.6	1949.69
701.616	572.493	1327.26
1007.66	724.088	1373.63
1394.67	495.804	1363.64
919.199	551.448	1242.01
2003.9	824.318	1706.06
800.777	963.429	1917.23
1969.3	521.129	1533.78
281.788	685.921	1680.74
1987.14	784.369	1097.9
1106.46	958.079	2284.62
1853.02	1096.48	3003
1362.57	1012.65	1378.98
855.707	1334.39	2044.21
1387.18	1053.32	1712.84
960.932	706.61	2620.27
1057.6	527.193	3019.77
1423.56	343.496	1538.42
1942.55	1239.15	1435.33
787.936	412.694	2266.79
1097.9	1162.82	1671.82
962.359	363.114	1635.44
1036.19	782.585	2429.08
1112.88	659.526	1797.73
1091.13	440.16	2418.38
1530.21	713.744	1527.36
1647.21	1029.77	1393.6
1287.31	677.361	2011.04
2067.39	475.472	4289.95
1481.35	847.147	1892.97
2021.74	517.919	2150.15
1212.4	1074.72	3636.85
1042.26	611.372	1904.39
715.884	1728.54	1897.61
1264.83	932.04	1634.01
2572.83	824.675	1489.19
1045.11	693.412	1424.63
1626.52	531.473	2373.08
1710.7	510.785	2161.56
1237.01	607.806	1617.96
993.034	1215.97	1549.83
563.576	1320.48	2247.88
1224.17	375.598	2472.24
1452.46	464.058	1741.73
1072.58	781.159	2439.43
1154.26	1324.76	2179.4
1128.93	854.281	2111.27
1137.85	1463.51	1334.03
852.854	672.367	2148.72
769.744	811.477	2928.45
1896.18	748.343	1637.94
1024.42	602.812	1640.43
712.317	650.965	1752.79
2202.23	758.687	2583.89
1581.58	1074.72	2564.98
1054.39	560.365	1554.83
1467.44	801.847	1546.98
1064.73	546.811	1244.5
698.406	578.557	1156.76
1003.74	982.334	2389.13
1059.02	917.059	1500.97
1153.9	613.513	1299.08
1273.04	551.805	1522.72
1017.29	518.632	1234.16
863.911	831.452	1787.03
2980.17	369.178	2315.65
1764.56	763.324	1553.4
866.765	1019.43	2552.5
915.275	824.318	1651.49
1784.89	843.223	1507.39
1278.39	1162.46	1693.22
1429.63	533.97	2246.46
1067.58	902.434	1989.64
1562.67	808.624	3321.53
575.346	747.986	4725.47
888.88	999.098	1542.34
974.486	645.258	1732.1
1876.92	527.55	1569.09
1202.06	636.341	1597.63
1746.01	857.134	2184.39
1278.75	668.8	2134.45
1020.14	1260.55	1479.21
1244.86	924.193	2655.94
1326.9	820.395	1666.11
986.971	988.397	1375.05
1024.78	762.967	2283.91
402.35	921.696	1555.54
1570.52	772.955	1861.23
985.901	642.405	1649.35
1232.38	714.814	1519.87
1298.01	901.008	4843.54
892.804	902.434	1625.81
2638.46	464.772	1320.12
1205.98	635.271	2018.88
1192.43	486.53	1335.82
1018.72	962.715	1492.41
1621.17	703.399	4908.81
798.993	805.057	3858.71
1980.72	683.781	1504.18
1746.01	873.185	2806.82
1344.38	708.75	1687.52
1519.87	742.636	2121.97
1459.23	1627.95	1858.37
2236.11	542.174	1865.15
1696.43	1691.08	1616.89
1139.64	735.859	1211.33
1173.52	891.733	1937.2
1583.36	640.621	1345.8
685.921	743.349	3488.82
2190.1	825.389	2216.49
1034.77	780.802	951.301
2650.23	1875.49	1971.44
1292.3	649.182	1956.46
3035.82	872.829	1653.27
1144.99	420.542	2176.9
1194.21	861.771	1354.36
1585.5	1082.56	1896.54
757.26	766.891	2285.33
1005.52	527.55	2075.6
758.687	781.159	2109.84
897.441	2116.98	3037.24
2391.27	1013.37	2868.53
1222.39	780.802	1507.03
653.106	1613.68	1478.14
868.905	786.866	1601.91
3142.11	407.344	2378.43
877.823	419.471	2469.75
892.447	1308.71	1597.99
2209	583.907	912.778
1023.71	708.393	2664.86
907.785	630.277	1557.68
2111.63	605.665	2490.79
1100.4	483.32	1731.03
1801.3	599.245	2304.24
1367.92	968.066	2189.03
2245.74	910.282	2568.19
840.37	751.553	1346.52
914.562	354.91	3126.77
1031.2	718.381	4330.61
2670.56	604.952	1132.5
670.227	1246.64	1239.87
1396.45	513.995	2158.71
1138.57	949.518	1641.5
1141.42	658.099	2382
1379.33	615.296	2165.13
1084.7	831.096	1610.11
845.72	827.172	2238.96
1624.38	636.698	2786.85
973.416	861.771	1890.83
1066.51	1564.81	1449.6
758.33	970.563	1777.05
1069.37	896.014	1957.89
985.544	561.792	2526.46
822.892	1014.79	2018.53
1253.42	864.268	2516.83
1878.7	840.37	1660.05
754.05	441.586	1719.62
1144.27	729.795	3477.05
1863.72	525.053	5502.35
2080.24	856.421	1428.2
721.947	262.17	1454.6
1565.88	942.741	2059.55
2803.97	739.425	2210.79
935.963	762.611	2053.48
812.904	520.772	1268.05
866.408	593.538	3245.55
701.616	780.445	2453.69
1091.13	1074.72	1782.4
920.269	944.167	2223.98
983.047	643.475	2451.55
1904.74	427.319	3066.14
995.888	614.939	1790.6
1293.73	1596.2	2524.68
1776.33	796.853	2101.28
1402.52	845.72	1056.53
1832.33	542.531	1572.66
1412.15	1005.16	4516.45
1231.31	1269.83	3237.71
783.299	563.576	3019.41
1432.48	1020.86	2110.55
1066.87	801.49	2511.48
1280.89	852.854	1158.9
1011.58	752.98	1703.21
752.98	727.298	1678.6
1003.02	822.178	2591.02
1464.58	1534.5	1321.91
1131.07	537.18	1719.26
587.117	1456.02	1351.51
898.511	466.555	2131.6
898.511	866.765	1323.33
1663.62	1249.5	3429.61
1116.09	1033.34	1844.46
994.461	640.978	3320.1
1295.15	1905.46	1228.81
1698.22	560.722	1703.57
665.59	488.313	2258.58
1704.28	645.972	3047.95
892.09	810.764	1815.57
706.61	394.86	2024.59
2516.83	974.13	1052.96
1223.1	560.365	2049.2
844.65	863.198	2358.46
1382.19	518.989	3879.4
696.266	829.669	1837.68
1576.23	1198.49	2498.64
1039.05	645.972	2013.89
888.88	713.387	1058.67
1187.08	866.765	4391.61
724.444	1103.97	2765.09
1056.53	831.809	2299.25
910.995	863.555	1491.34
393.433	1397.17	1517.02
530.76	874.256	1478.14
1306.92	379.522	2439.07
1031.2	682.711	1668.61
1340.45	655.246	2001.41
1618.32	836.089	1675.03
1257.7	691.629	1955.04
1345.8	805.414	1340.81
696.979	837.159	2830.72
1095.76	859.988	1694.65
1048.68	1167.1	1686.8
1012.3	583.194	1722.12
1212.76	653.106	1636.51
619.576	640.621	1678.6
1458.16	1100.04	1635.08
1067.23	806.841	1682.88
1008.02	1110.39	1308.71
1265.55	674.151	2223.63
1254.49	1352.22	1195.64
1125.37	747.986	1666.47
1246.29	1191.36	2892.43
1239.15	802.56	2395.2
1230.95	1077.21	1836.97
923.479	677.004	1550.19
868.192	838.229	1115.38
1508.81	862.841	2061.33
1323.69	597.818	1287.66
1706.06	1448.53	2178.33
2511.84	1006.59	3638.63
823.605	857.848	1434.26
859.274	914.562	986.971
2442.28	797.566	2296.04
1138.21	987.327	2295.32
868.192	296.056	1401.45
1459.59	889.237	2792.55
893.16	459.421	1149.62
1663.97	761.54	1992.49
2049.2	1368.63	869.262
1400.38	931.327	1903.32
879.249	738.712	1481.35
2413.74	677.004	2009.97
829.312	635.984	2079.88
1552.69	761.54	2574.97
1120.73	729.438	1541.63
996.601	769.744	2412.67
540.034	969.493	4176.88
1870.86	309.61	1697.5
1060.45	387.369	1062.95
1113.95	459.421	1290.87
1218.82	839.3	1308.71
1465.65	667.017	1730.32
1522.72	486.887	2302.1
1958.96	566.786	5256.59
2240.39	792.216	1772.05
871.402	1203.13	1831.26
1392.53	801.847	4523.59
960.219	384.516	1515.95
1471.36	634.201	1827.34
848.93	897.084	1326.19
657.386	791.146	4825.71
897.084	1096.83	1949.33
1226.67	685.565	1981.79
2591.38	666.66	1611.9
1752.43	997.671	1367.21
1665.76	763.681	1882.98
1641.86	1376.48	2269.64
1416.79	773.668	1853.74
1278.03	828.599	2199.01
964.499	973.416	3407.49
1528.07	855.707	2347.76
1409.65	910.282	2893.85
2137.31	336.005	1843.03
1570.16	1225.96	2365.95
862.841	679.501	2813.6
2118.76	653.462	1422.85
1980.72	980.193	1408.58
1006.23	1525.22	2123.4
2419.09	628.85	2088.8
1448.53	771.528	2274.63
1407.87	1061.52	2449.77
1258.77	779.732	3614.73
1308.71	541.461	2355.25
1277.32	408.771	3518.78
1226.67	365.611	2038.5
1041.9	854.994	1641.5
941.314	837.873	1736.03
723.018	586.047	3124.28
664.877	773.311	1881.56
1637.58	635.271	2298.89
2897.78	688.418	1667.54
1170.31	1020.14	1565.88
1818.78	906.715	2407.68
1814.5	791.146	1070.44
1094.69	686.635	2039.93
1080.42	1070.44	1364.35
820.395	695.909	1829.84
1268.4	1286.59	2505.06
2322.43	657.743	1486.34
1132.14	607.449	1957.18
1232.38	683.068	749.413
1193.85	1210.62	1615.82
1294.44	597.105	1643.64
1100.04	472.619	1592.28
2586.38	559.295	1724.26
1050.46	521.842	1692.51
725.158	859.988	1528.43
2073.82	839.656	1828.77
1478.49	639.908	2401.62
1452.1	1337.96	2028.16
1059.02	637.054	1884.77
760.827	640.265	2160.14
1870.86	503.294	1432.12
1147.13	778.662	1646.14
913.849	1346.52	1885.84
1287.31	1224.53	2817.88
745.846	873.899	1734.6
1038.33	470.479	2251.09
1012.65	1025.49	3121.42
1072.22	1144.99	1900.46
654.176	747.629	2853.55
1384.33	838.943	1938.99
2908.83	672.724	1607.62
1381.12	532.9	2188.67
1785.96	906.001	1323.33
742.636	1172.45	1473.86
915.275	509.358	1154.62
1438.54	895.657	2529.31
1259.48	684.851	2684.47
1436.05	660.596	1566.6
1349.01	994.105	2538.59
1137.85	1706.42	3595.47
1951.83	663.093	2580.32
890.663	1083.63	1493.83
1114.67	474.046	3300.13
1764.56	1061.52	2126.61
1274.47	397.356	1472.07
1805.94	703.756	1148.55
826.102	603.169	1783.82
1860.16	917.415	1639.36
1834.12	731.221	1597.63
1070.79	758.687	2215.78
863.911	818.255	3182.78
3561.23	1146.41	2981.96
3369.68	565.359	1970.02
1238.8	1126.44	1650.06
1945.05	604.239	2322.43
1550.19	1169.24	1715.7
1792.38	1299.79	1685.02
2310.66	751.196	2410.89
964.856	544.671	5154.22
1111.1	423.752	3174.57
1270.54	904.218	1746.01
729.081	694.482	2559.99
1046.9	805.77	1531.28
592.824	501.511	1532
569.639	892.09	1205.62
752.98	692.699	2495.43
1197.06	732.648	2625.26
862.485	786.509	1399.31
523.626	1229.52	1581.58
769.744	615.296	3354.7
2375.93	546.454	2591.73
970.206	479.039	2711.58
656.673	726.584	1646.14
1183.15	647.042	2033.15
2367.73	578.557	2155.14
1540.2	1737.81	1837.33
815.044	542.174	1465.3
997.671	1360.43	2048.49
1702.5	787.579	2920.61
983.047	812.191	1888.33
943.811	1133.57	1297.65
1601.2	1191.71	2611
1691.44	555.372	2221.13
1074	1001.95	1820.21
1480.63	807.197	2534.31
1347.23	712.673	1709.99
2030.3	759.4	2255.73
1153.55	641.335	3343.64
663.093	1289.09	1369.7
765.464	700.546	3302.27
1417.5	706.61	1589.07
1595.49	1157.83	2318.15
846.79	1576.58	2889.93
711.603	2307.45	1946.48
1433.19	635.628	3695.34
1380.76	792.573	1965.02
1124.65	489.74	1998.91
1364.71	782.585	1634.37
1290.87	481.893	2898.13
883.173	482.963	1787.75
789.363	772.955	1364.71
1147.48	679.858	1672.54
1408.94	1188.86	3024.4
883.53	850	2798.97
1632.59	1391.46	1122.51
827.529	540.391	1294.8
1240.58	1061.16	1922.22
960.575	884.243	1173.88
1426.42	724.444	1699.29
967.353	1288.38	2036.72
831.452	1071.86	1434.98
1083.28	1194.92	1533.78
3179.57	1193.85	2165.13
1293.37	978.767	2485.8
1676.82	727.655	3494.17
1066.87	658.099	1657.2
1067.23	882.103	1988.21
738.355	640.978	1424.28
1529.14	1081.14	1178.16
1176.73	628.494	1890.48
1479.21	1606.55	3800.92
1390.39	679.501	1289.8
1138.21	882.103	1685.73
876.039	1897.97	1478.49
1258.77	779.018	889.237
1587.64	649.539	1441.75
1810.93	658.099	1937.2
884.243	833.593	2237.54
631.347	990.181	1549.12
866.052	819.325	2781.5
538.25	707.68	1946.48
1079.71	692.342	4532.86
970.919	567.856	2129.46
1287.31	884.243	1564.81
1281.96	833.236	2522.54
3437.45	673.794	2316.37
1042.61	607.449	1624.74
888.523	627.424	1562.32
1469.93	673.437	1687.87
1258.06	980.907	2761.52
1583.72	537.537	2768.65
927.046	542.887	2783.99
2044.21	1001.24	2075.24
1136.78	479.396	1434.62
1455.31	698.762	1814.14
2050.27	1288.38	2108.77
923.836	1987.5	1903.67
1655.41	1900.46	939.53
1033.34	776.878	2366.3
1384.33	630.634	2167.27
1295.87	550.378	1518.8
1692.15	1283.03	1217.39
1870.14	858.918	1274.47
1602.98	554.658	2013.18
1446.39	942.027	2100.92
1581.58	1100.4	2464.75
1535.92	897.084	2548.22
1128.22	1406.8	2023.88
1387.54	451.574	2292.47
765.821	920.269	2384.85
737.642	711.96	2088.44
2041.36	1003.02	1341.17
1342.95	828.599	2272.49
1057.24	736.572	1480.63
923.836	727.655	2424.8
1645.43	1068.65	2237.89
1325.83	1002.67	2508.27
1073.65	621.717	3295.13
1092.91	935.607	598.175
1750.29	1142.13	2325.28
1285.17	654.889	2258.94
1401.45	739.782	1274.11
1447.11	892.447	3112.86
803.987	593.895	1799.16
1031.56	1532.71	1834.12
908.855	547.524	3244.84
539.677	583.194	1429.27
971.276	637.768	1291.23
1235.23	803.274	1547.34
1148.91	699.119	2863.89
1011.58	515.422	1269.47
1779.9	645.258	2078.45
740.139	729.438	2686.97
1145.7	849.287	2380.93
1036.91	781.515	1288.02
3529.12	495.09	2469.75
618.15	787.579	3478.12
998.742	732.292	2174.4
1326.9	622.073	2088.08
733.362	738.712	1854.09
908.141	774.738	3067.56
1186.72	827.885	2607.43
1347.59	525.053	2167.63
712.673	810.764	1492.76
1013.72	650.609	1738.17
1442.11	689.488	3431.03
743.349	541.461	2828.94
1025.85	741.566	1741.73
1234.16	647.042	1749.22
1183.15	1107.53	2618.49
682.711	811.121	1574.44
961.645	1298.01	991.251
1692.51	691.629	1703.21
1728.18	611.016	1618.67
978.053	791.859	2879.59
952.371	1022.28	2682.33
462.631	623.5	1942.91
1066.51	1020.5	2495.07
1169.24	601.742	1966.09
1512.74	721.591	2310.3
801.49	812.904	2780.43
2010.32	631.704	2711.58
1041.9	494.377	2338.84
910.282	598.888	1836.61
1056.53	532.543	2459.04
777.592	694.839	3619.72
2342.05	700.189	1858.02
571.423	739.069	1203.48
1406.44	862.128	2025.31
1213.47	1851.95	958.792
1042.97	724.444	2006.04
904.575	722.661	1886.55
1042.61	618.863	2919.18
1010.87	702.329	1734.24
978.767	614.583	1330.11
834.663	942.741	1351.51
1751.01	1098.26	1545.55
1337.96	605.309	1524.51
1225.6	1104.68	2503.99
1285.17	806.127	1982.5
695.552	670.94	1217.04
933.467	548.594	1914.37
1231.31	598.175	951.301
1052.96	653.106	3335.8
672.367	551.448	2501.85
565.002	733.005	1700.36
1809.51	963.072	1234.16
617.08	899.937	1206.34
1205.98	516.492	1841.96
801.49	755.12	1676.82
1279.1	773.311	2411.96
1202.41	1154.62	2124.82
631.347	525.409	1329.4
805.77	1372.2	1537.71
1028.7	581.41	2107.34
2065.25	1016.22	1127.51
1236.66	583.907	2189.38
1237.73	1106.11	1150.69
1294.08	546.454	1615.82
474.402	1133.93	2435.86
628.137	901.008	2122.33
1291.23	1113.6	2257.87
3059.36	601.385	2179.04
1361.5	506.861	2625.98
910.638	630.634	1808.79
1475.28	785.439	1855.16
1046.18	949.518	2101.28
1297.29	561.435	4400.53
1170.67	1855.16	2336.7
2248.6	685.565	2241.46
3581.92	703.043	1925.79
1627.59	722.304	1396.45
1172.81	797.21	1031.91
1142.85	911.708	2329.92
2321.36	532.543	2289.61
847.86	857.134	1972.16
1202.41	762.967	2366.3
1284.81	835.733	1902.96
1192.78	505.078	1305.5
1155.33	1159.97	2894.21
1957.53	772.955	1086.49
1480.63	536.824	2239.32
1646.14	731.935	1883.34
3444.94	573.563	1391.46
1492.41	611.016	2763.3
893.874	1202.06	2556.42
921.696	906.715	1477.78
1442.11	514.709	2352.75
1169.24	978.053	1799.52
1291.23	748.343	1332.25
924.549	760.827	1522.37
1117.16	646.328	1915.44
1125.37	496.517	1542.7
1045.83	863.198	1337.96
1016.22	2757.95	1662.55
1214.54	765.821	1433.19
1126.79	589.971	2077.74
1857.66	626.71	1831.62
1140.71	984.474	2297.11
1126.08	666.303	1426.77
1041.19	703.043	1617.96
1299.08	1365.42	1590.5
929.9	460.848	1912.23
1524.86	1037.26	3258.39
907.071	771.171	1971.09
1881.91	513.639	1278.03
1684.66	1496.69	2401.97
2599.58	1044.4	1264.12
1107.53	1167.81	1604.76
1179.94	520.772	1443.54
1137.14	689.488	1509.17
2794.34	467.982	1980.72
795.07	780.445	1749.58
935.25	637.768	3292.99
1011.58	547.168	3830.53
2102.71	650.609	1714.98
3281.94	700.189	2169.05
963.786	779.375	2031.73
1226.67	474.759	1882.98
[truncated: 20,501 more rows]

## Sheet: fig5d
lac + & oleic +	lac + & oleic -	lac - & oleic -
1016.52	79.9184	2557.39
2202.86	155.175	1387.47
1616.79	163.611	3190.74
2217.96	106.114	2435.74
3860.28	197.798	2027.04
1367.49	80.8064	5193.81
463.083	213.56	2061.45
860.677	92.5722	1685.17
2263.69	119.656	1857.88
967.013	325.668	3169.21
1053.59	301.47	618.258
1015.63	111.886	2988.95
78.8085	148.737	2160.24
4753.81	110.11	2349.6
590.064	109	2371.8
1385.7	78.5865	2828
331.662	190.472	2007.28
1279.36	74.3685	1884.3
697.288	138.747	774.987
657.773	277.495	3388.54
767.217	186.476	835.814
301.692	127.869	2352.93
1666.52	65.2667	2602.68
1260.94	160.947	3825.21
744.351	73.4806	1199.66
100.12	99.2321	1684.73
1793.5	170.493	1239.85
1530.88	138.969	1802.83
273.943	98.5661	1972.21
1511.12	101.674	3625.85
377.837	304.356	1992.85
727.48	120.766	2606.67
1444.08	162.057	2310.97
93.9042	99.0101	2207.3
64.6007	190.028	1504.46
632.244	108.334	1263.16
833.594	282.378	1331.53
1197.22	159.393	644.453
458.865	203.126	1367.72
1222.31	170.049	858.457
1563.74	266.395	3014.92
743.463	89.6862	3729.08
882.877	131.643	2746.09
1171.69	166.275	1346.63
786.975	122.098	1348.85
1640.33	151.845	2301.65
1626.34	63.7128	2024.82
1534.88	130.533	985.661
2414.87	87.6883	1588.82
425.788	74.3685	981.887
903.078	294.81	1663.41
1408.34	180.482	2460.38
813.392	120.1	3165.44
1543.98	163.389	3013.59
936.6	117.88	1231.85
396.262	108.778	602.496
1022.29	262.399	4522.05
1769.97	129.645	1777.52
571.861	127.204	1240.07
433.558	127.426	2259.92
467.967	93.4602	1603.25
1846.56	64.8227	980.111
1078.01	196.244	1179.91
398.704	87.0223	2043.25
67.9307	63.4908	1465.62
932.604	160.281	841.585
464.193	102.118	760.113
1191.23	294.588	1041.16
1070.02	150.735	852.019
1125.74	247.747	4134.23
203.57	120.322	4697.43
2961.64	92.3502	1524.67
1881.41	141.855	1092
961.685	218.222	1684.5
1214.09	383.386	1600.81
673.535	142.299	2361.15
1232.96	245.305	2492.12
3330.6	300.138	1335.97
1638.11	342.317	2057.9
642.899	279.049	4458.34
1983.98	228.434	1103.1
248.191	199.796	4706.09
63.4908	301.47	916.842
1271.59	172.491	1117.97
3210.95	170.049	2601.57
1232.52	85.2463	613.374
1298.45	178.041	2204.64
1248.73	68.1527	2120.95
743.685	164.499	1887.85
1754.43	83.0264	2122.5
1085.11	166.941	2709.46
2510.99	182.702	3203.84
856.015	174.711	2711.45
428.896	308.352	683.303
1273.81	111.886	2023.05
1152.16	157.839	2145.14
643.121	423.124	830.93
1406.79	109.666	3335.71
855.793	166.053	2459.49
1294.46	142.743	2301.87
3299.74	69.2626	634.242
2528.31	139.857	1137.95
77.0325	215.78	2049.46
1425.66	510.368	1477.6
1910.27	114.772	1155.27
1587.49	139.857	1917.15
735.028	67.7087	2260.8
1097.99	149.181	882.877
786.309	241.531	3142.13
342.539	181.592	1864.99
1390.36	134.529	2789.15
1681.4	343.427	2885.06
2608.01	226.88	1585.05
203.126	128.757	3366.56
1002.31	114.106	2243.27
375.617	276.385	1139.95
451.095	135.861	313.458
1000.98	104.116	1236.52
449.985	152.067	2692.36
1239.62	187.808	4805.1
293.256	133.419	3051.11
1030.95	87.0223	2049.46
659.771	134.307	1341.3
929.718	143.187	2196.65
740.355	291.48	2573.15
815.39	125.428	2950.1
1524.22	119.878	2736.1
3478.01	212.45	2548.07
1349.07	178.707	1636.55
474.627	124.318	789.195
1847.23	66.1547	2895.49
1382.37	69.0406	2812.91
1193.23	219.11	2627.1
477.291	237.979	3442.71
1213.87	146.961	2194.87
270.835	145.407	1146.61
1101.54	122.098	1885.19
1550.42	120.766	2746.75
1131.07	104.338	3321.72
1698.49	227.99	1915.6
1419.44	144.297	2515.21
507.704	77.9205	1698.27
1752.66	208.898	696.4
915.954	89.0203	2318.52
852.907	100.564	2238.16
981.443	285.93	1287.8
420.238	194.912	1151.05
2200.64	81.2504	2682.6
1371.49	321.006	1995.96
1089.78	183.812	3333.04
1822.81	269.059	1188.34
1851.67	75.7005	2304.09
747.681	174.045	2147.59
1196.11	192.692	3085.52
527.684	95.6801	1849
934.602	177.153	2979.4
919.062	268.837	2813.35
2394	81.9164	1562.41
1890.07	75.9225	4837.29
301.47	158.727	1551.75
1453.41	101.452	1670.74
506.594	168.939	2709.46
527.462	87.0223	2066.56
886.651	466.635	4278.74
1286.69	65.0447	1884.74
1141.95	208.454	1205.21
403.366	128.979	2191.76
478.623	254.407	4056.3
1692.94	108.556	2648.41
451.095	87.6883	1680.06
1699.6	217.112	3117.26
366.515	218.666	1086.22
1697.6	159.837	1282.47
743.463	228.212	1544.65
1905.83	228.212	2249.7
1711.81	311.682	1910.27
687.077	158.283	965.237
132.087	71.4826	1604.14
1425.21	146.739	1955.34
426.898	246.193	1904.5
730.588	136.083	1469.83
581.407	178.041	2702.13
693.292	107.002	1675.18
1385.92	191.138	3071.09
1619.24	115.438	2169.34
1644.1	150.735	4082.28
1892.96	108.556	1331.75
1493.59	226.658	3106.16
1108.65	148.959	1785.29
1972.21	115.438	2031.48
1462.51	81.9164	1472.28
1014.74	152.733	1947.57
1585.05	359.189	1759.09
1491.81	128.535	2226.84
1418.11	189.584	2205.08
1276.03	67.9307	3881.59
739.912	215.78	3334.82
881.989	175.821	1332.64
1052.48	71.9266	940.152
240.421	242.197	2771.17
1904.28	76.3665	541.669
202.682	163.611	2802.92
718.6	69.9286	2794.93
1030.06	416.242	876.217
1425.88	166.275	2355.82
628.47	205.346	1213.65
1708.03	140.967	2397.11
1696.27	149.403	901.08
114.328	159.837	3253.79
608.934	166.053	1403.9
2391.56	112.552	2497.67
1086.67	92.5722	1488.48
3814.77	147.405	1710.25
4070.73	118.99	2714.12
395.374	145.185	1926.03
1412.11	276.163	2217.51
976.559	172.935	920.616
1262.71	131.199	1653.2
762.999	129.423	546.775
1166.81	243.973	1721.13
1188.34	72.1486	1799.05
1290.68	208.01	4523.16
502.82	256.405	1142.39
1872.31	91.4622	2314.53
103.228	271.501	3530.17
1175.02	86.8003	2626.43
2520.54	126.538	1580.39
1440.97	167.385	2411.54
2375.8	79.2524	1757.98
265.063	76.1445	2815.57
955.469	227.768	974.117
1094.22	132.975	1241.4
1819.7	199.13	2977.85
1759.54	85.6903	3188.97
472.629	79.9184	2787.38
1005.42	212.894	4433.25
1290.46	347.867	1333.08
1619.46	207.788	2292.99
1787.95	112.108	1731.12
898.416	142.077	1872.98
1576.61	300.582	2697.91
990.101	215.336	3482.89
1012.52	428.008	2065.89
537.007	122.542	804.512
920.394	154.065	2697.91
744.129	88.1323	1287.13
724.594	189.14	2818.68
2686.81	106.78	1969.99
1347.29	113.44	2222.62
2247.04	362.075	1421.44
77.9205	65.2667	3906.9
3798.79	92.5722	4675.45
781.869	124.54	598.056
2271.46	111.22	5117.44
291.036	199.574	1003.64
89.6862	153.177	1204.99
576.301	200.462	1755.32
486.614	97.4561	882.433
1016.74	75.9225	438.663
1316.21	133.197	4063.63
810.728	93.9042	664.433
633.132	255.961	1443.19
1289.57	187.808	3079.75
2639.97	192.026	1446.52
449.763	297.696	579.853
619.812	104.116	1353.95
1309.11	179.594	2285.67
842.03	263.065	1431.65
661.547	186.476	1510.9
1391.69	74.1465	1163.48
497.048	212.894	1358.39
1755.32	132.309	826.49
283.932	192.692	1398.57
3453.14	249.745	1373.93
863.341	243.307	2776.94
1268.48	111.22	2363.59
804.512	133.197	2374.24
1216.98	71.7046	1218.09
584.293	135.195	2210.63
1679.62	190.472	3449.81
1061.36	166.275	2061.9
2441.06	206.678	984.995
641.567	78.8085	1123.3
1382.81	270.835	3648.72
214.226	76.8105	2891.94
102.784	124.54	1818.14
1046.27	189.806	2442.62
1216.98	90.3522	1672.29
1726.24	250.633	1257.83
202.016	145.407	855.571
949.475	407.584	3068.2
1605.92	95.6801	1065.58
1940.69	329.22	1971.54
597.612	217.112	1986.64
1344.85	172.491	1361.5
719.71	271.945	1261.6
1809.71	67.9307	2430.85
1012.3	246.415	883.099
1274.03	239.089	995.65
1014.96	66.8207	1313.55
1175.91	148.515	2439.07
2933.89	251.965	1451.85
83.4704	86.5783	522.8
750.123	85.6903	4972.04
1061.36	182.036	3580.57
157.395	97.9001	2443.51
1569.29	246.415	1234.96
716.38	166.275	2472.59
2407.99	248.857	3323.5
1539.98	191.138	913.068
893.31	136.749	2078.99
442.437	115.66	512.588
1338.41	66.5987	1263.6
1813.7	77.9205	946.589
598.944	154.287	4922.09
1623.23	320.562	2634.42
1520.23	369.179	1937.13
508.814	152.733	2071.44
1798.83	193.136	1582.16
1413	276.607	1986.2
1682.51	160.281	1829.69
409.36	274.831	3214.94
800.072	164.277	1597.26
1191.67	223.328	1490.7
1032.28	131.199	1284.47
892.866	136.305	3635.62
1511.12	73.7026	2575.82
1159.71	172.269	1723.57
1222.31	80.5844	1009.86
670.427	243.085	3451.81
4652.36	122.098	1054.26
419.572	235.315	1303.34
2799.81	188.474	1187.23
63.0468	86.1343	2672.38
1049.82	169.161	2483.91
1553.97	272.389	1004.31
1657.64	134.973	894.864
3461.8	114.772	1917.38
835.592	89.6862	1863.43
1564.4	277.051	2235.05
774.099	131.421	74.1465
2042.36	96.3461	1932.69
665.987	150.291	1430.32
995.207	171.159	1292.9
721.042	170.271	1667.41
830.042	333.215	3050
1687.61	377.393	1534.21
1284.91	430.45	1562.18
682.415	102.34	535.676
1752.88	67.0427	1698.27
853.795	159.393	4488.97
514.586	121.876	1736.45
399.592	382.943	955.025
1724.02	110.332	1595.48
1388.36	117.658	1855.44
351.419	74.5905	1976.65
1033.83	109	1566.62
2803.58	289.926	1511.12
1220.98	147.183	1509.35
1931.36	167.829	2532.3
1125.52	321.45	2756.74
915.732	123.652	2198.42
1561.74	93.6822	2387.79
1422.77	120.988	2692.36
1575.5	157.839	603.828
2865.3	105.448	1438.75
2645.74	174.711	2000.18
1046.27	143.409	1077.79
1263.82	323.67	1847
1650.09	81.0284	2576.93
164.721	243.973	1877.42
1920.04	64.6007	509.258
448.209	171.825	1344.18
249.745	139.413	1776.85
808.73	140.301	1533.32
1324.43	133.197	1805.27
1243.84	109	1712.7
731.698	172.935	3129.69
1306.22	181.37	1386.14
324.114	121.21	2088.98
1109.53	139.413	1999.51
1165.03	132.975	1782.63
3276.88	181.814	1300.89
3168.99	223.55	174.711
1242.95	168.273	1278.03
332.105	130.533	1262.27
256.627	128.535	934.824
2879.51	115.438	1318.21
1279.36	148.515	1710.03
914.844	224.438	2756.52
1906.72	125.428	1015.41
249.301	157.395	2843.99
1391.69	185.366	1998.63
1391.91	91.4622	1446.52
989.213	291.924	1616.79
2325.63	260.179	2929.68
1161.26	136.971	959.021
1994.19	165.609	3780.14
1201.22	165.387	2234.61
606.714	83.4704	2592.47
1230.08	236.647	3451.59
741.021	131.421	1628.34
1444.3	468.633	1312.88
1342.19	141.411	1481.6
1482.71	182.924	1046.04
381.389	100.12	2542.07
1306.89	104.116	2145.59
1315.55	132.309	2611.33
3755.28	74.5905	1233.85
1784.85	200.906	1574.62
1517.12	202.238	1874.98
525.464	147.849	1744.66
953.027	151.623	1793.5
958.577	151.623	2483.69
1819.92	301.914	3764.82
894.198	83.6924	4143.33
1264.27	191.804	895.086
1710.48	150.291	1723.8
1347.74	159.393	3513.53
108.334	234.205	1523.56
1097.99	100.786	1106.65
354.527	71.2606	2377.35
1113.31	144.963	2407.76
2342.28	122.542	2227.5
1199	90.5742	1448.08
757.449	93.9042	1560.19
1541.76	114.328	2062.56
1224.08	238.867	2634.87
877.771	260.845	1669.85
1450.3	102.118	3024.02
1426.99	155.175	2071
1383.25	264.619	1339.97
3586.78	216.224	2292.11
1664.08	132.531	3466.68
136.305	317.454	1138.39
1048.49	115.882	2302.54
1234.52	262.177	2905.04
1044.71	130.755	2917.91
423.124	207.566	1426.1
1594.59	332.993	1191.45
84.5803	122.32	1848.11
1839.9	144.075	2581.37
2011.06	98.7881	1644.32
1516.01	124.54	2034.37
962.573	137.859	4040.32
533.012	153.621	2318.74
1110.64	85.0243	1700.71
287.262	265.729	2714.78
187.364	139.635	2310.75
1726.46	250.189	1456.29
894.864	127.648	978.557
828.044	105.892	2272.13
627.582	70.5946	4067.85
340.985	195.8	2732.77
1176.58	170.715	1299.78
1543.09	203.348	2985.62
2457.05	218.444	2625.54
1106.43	105.892	999.424
1175.47	138.525	1708.26
1410.12	150.735	3067.09
1139.95	213.56	1931.36
1389.69	148.959	3057.99
887.317	108.556	1104.65
706.612	303.69	1846.12
1946.9	481.065	1981.09
951.695	160.725	1618.57
68.3747	116.548	719.488
615.594	279.271	2129.38
1382.81	225.326	1788.17
721.486	150.735	1922.26
1335.53	194.246	3182.09
1147.27	87.9103	2370.69
923.946	186.476	1478.49
1846.56	261.511	727.924
1649.65	203.792	2501.45
1472.28	260.845	937.71
795.41	347.201	2897.27
1786.84	97.2341	3365.01
389.38	237.091	690.85
1224.75	87.2443	2205.97
1856.11	126.094	1291.57
580.519	138.081	2435.74
1418.33	134.751	3343.03
1005.42	303.468	3393.2
632.688	111.442	755.673
63.0468	91.2402	1447.19
318.342	367.847	1576.39
215.114	131.199	2062.34
321.45	89.9082	697.51
1082.01	83.0264	1097.77
1529.55	240.421	2150.25
807.62	196.022	900.858
661.769	164.055	433.558
1297.34	168.051	2005.95
1237.63	140.967	3230.7
1928.92	69.4846	1008.97
269.947	182.48	1263.82
77.0325	120.766	3003.38
1235.63	244.417	2552.95
1157.93	165.165	1109.31
1989.97	107.89	3268.89
2684.37	101.008	3101.95
4515.17	90.7962	1018.29
2131.38	132.531	3751.73
1250.06	97.9001	2932.34
1085.56	95.2361	1896.73
2230.17	131.199	3642.73
1437.64	108.556	2834.88
535.453	75.0345	2241.27
546.109	146.961	1198.11
1389.91	93.4602	855.571
2390.67	139.413	662.657
1094.66	156.951	3128.58
99.4541	205.124	3063.1
1623.45	99.898	945.257
3133.47	75.4785	1199
1370.38	205.124	3239.14
1555.97	95.2361	1783.51
1319.1	76.5885	757.449
3949.52	357.413	1723.57
1494.47	72.8146	987.881
247.525	228.656	1536.88
414.022	167.385	1715.8
2047.24	154.287	903.078
1956	114.328	1187.68
730.81	81.9164	3565.47
1354.17	70.8166	2241.49
2436.62	212.006	1751.32
377.837	194.468	5312.36
1164.15	285.708	1139.06
996.095	404.698	1232.96
1000.31	83.4704	2106.74
2812.02	247.969	1382.81
838.922	90.5742	2108.07
1732.9	116.326	3454.7
2828	230.653	3226.04
701.506	354.083	1950.01
1103.98	106.558	3326.38
276.385	64.1567	1221.42
546.553	75.0345	1912.71
1132.4	324.78	3225.37
1758.87	169.383	2509.22
1064.69	214.892	2835.99
1228.08	140.079	3003.82
2262.36	72.5926	2269.91
1355.51	198.686	3081.08
436.443	158.949	2546.51
2161.79	155.619	2056.12
282.156	186.032	3529.29
675.977	69.9286	755.229
1642.55	206.012	954.359
1136.4	67.7087	1777.3
1074.01	313.236	854.017
666.653	82.3604	2229.28
130.755	186.92	1741.11
1403.46	329.886	3533.5
864.451	254.185	2682.15
1620.79	106.78	2470.15
1643.88	190.028	2385.79
81.0284	244.639	1086.22
573.415	68.8187	2377.8
850.909	274.165	605.16
951.029	91.0182	864.007
1851.44	191.804	1570.4
1273.15	169.827	1804.38
339.875	107.668	682.859
2270.79	262.843	4036.55
860.677	84.5803	767.661
1385.47	221.996	1931.14
932.382	175.155	1476.27
492.386	388.27	1850.33
697.066	151.623	3116.6
149.625	68.8187	1773.08
254.185	198.686	3368.12
755.451	116.548	1051.59
167.163	202.238	1904.28
1426.1	93.2382	751.677
951.695	196.244	2622.21
2359.59	178.041	2004.4
477.957	195.578	996.538
216.668	220.442	1448.74
65.0447	194.246	1713.81
184.478	118.546	838.922
2098.75	201.572	1351.51
3270.22	134.307	1999.29
2004.62	82.5824	1780.85
1012.08	274.165	644.675
1140.61	146.739	1918.49
791.636	173.823	2175.56
349.421	174.933	1466.28
178.707	363.851	2073.22
461.973	131.421	1383.7
1434.31	111.886	1865.65
591.174	297.252	1509.13
719.044	120.544	4252.55
3915.12	131.865	3756.39
1684.28	259.957	3221.82
1168.14	247.081	4402.17
1234.74	160.947	2421.75
1714.69	462.861	2356.04
1644.99	109.888	1893.62
1609.69	296.586	4556.68
764.997	73.9246	1120.41
510.146	121.876	1519.56
1292.24	77.4765	1817.7
406.252	217.334	941.706
1043.6	212.006	3721.54
2595.8	221.33	1655.64
483.729	79.0305	945.923
1451.19	211.118	1977.98
537.007	97.6781	1836.57
859.123	182.924	2338.28
1957.34	172.269	1342.63
1160.59	197.798	2853.98
689.962	85.9123	2208.19
1455.85	197.354	657.329
2390.67	301.248	2656.4
1058.92	100.786	2663.73
1227.64	299.916	1512.46
1179.46	211.118	1038.27
216.668	123.208	1934.25
2083.87	324.78	2408.87
97.0121	221.552	1833.68
1444.3	144.297	2124.05
2123.39	273.943	2277.23
454.869	140.967	2305.65
1423.21	140.745	893.755
868.669	155.397	3778.14
198.686	130.089	1753.77
533.9	88.3543	2246.15
63.2688	113.662	2353.82
2077.88	257.737	1155.04
905.964	178.041	840.476
2253.7	112.552	481.953
1782.63	155.397	751.677
182.702	91.0182	2296.54
3013.81	129.201	1668.3
1865.87	111.664	2778.5
285.042	218.222	2049.91
407.806	71.9266	1037.16
2899.49	111.22	1256.5
228.212	141.411	1467.61
953.915	219.554	6658.76
995.428	103.006	3192.96
1259.38	73.4806	1507.57
881.767	73.4806	3058.21
504.596	105.448	2432.18
1403.9	119.878	2213.52
580.741	132.087	2480.8
69.4846	224.438	1036.94
2356.71	158.949	3359.46
700.84	305.688	1383.92
2329.4	172.491	2138.71
134.085	302.58	2204.42
677.753	291.924	1865.21
2283	82.5824	1964
862.897	177.153	934.38
1677.18	130.977	1588.16
1275.81	85.2463	3530.4
85.2463	451.539	1797.5
2480.14	511.256	2649.52
785.865	331.439	1344.63
354.749	131.865	1645.88
595.836	139.635	2408.65
1039.38	132.975	2520.09
876.217	119.434	3093.73
1221.64	106.114	1741.56
182.924	80.1404	2522.31
2558.28	131.643	2726.55
909.516	63.7128	1443.86
961.241	71.9266	2582.92
1341.96	103.006	1398.79
348.977	289.482	3045.78
249.301	151.179	3832.53
627.804	414.91	1231.19
2937.89	91.9062	1891.62
1561.3	72.1486	746.127
92.3502	274.831	2000.18
503.486	91.4622	1150.16
475.515	89.2422	2484.8
207.788	191.804	6040.5
527.24	74.3685	2525.87
982.331	109	2084.76
1382.59	138.747	1059.81
817.61	163.833	906.408
152.733	464.415	4958.05
67.9307	142.965	2109.18
122.764	208.898	1161.48
466.413	78.1425	816.278
1842.12	459.087	2630.2
1626.78	157.395	2440.18
139.191	121.21	2679.49
500.378	260.845	1474.05
836.48	201.128	669.095
1349.29	288.372	1189.23
1557.08	80.8064	3562.14
1398.57	246.637	2562.94
2833.33	279.493	1197.89
978.113	134.529	1143.28
406.918	176.043	1396.8
658.217	166.941	1876.75
1552.64	202.904	1401.9
168.495	105.226	1202.99
620.7	81.2504	1484.26
85.0243	87.4663	2514.77
1387.47	213.338	2267.24
1800.83	208.676	3184.31
1747.33	80.8064	3038.01
674.201	132.087	828.488
1084.67	143.631	3725.75
873.775	211.784	3269.55
1022.29	445.989	1112.64
2342.94	156.507	1458.07
575.635	134.307	1576.84
1531.1	293.034	1006.75
723.484	106.78	2739.43
499.934	84.1364	1878.31
1399.02	191.582	1522
952.361	160.947	1603.7
2352.49	324.114	1642.77
1240.07	184.922	2387.34
233.095	90.1302	2294.32
1327.98	225.548	1891.62
1390.36	213.782	4134.67
1374.15	134.751	2255.92
957.467	88.7983	2165.57
72.8146	170.271	1081.12
590.952	76.3665	1688.5
1164.59	108.556	920.394
1425.21	162.945	980.111
976.115	81.0284	3993.26
149.403	80.5844	1111.53
461.751	164.721	1242.95
1313.33	110.776	2219.51
253.741	138.747	2503.89
368.291	203.126	3307.29
1780.85	555.655	1344.85
787.863	174.045	1012.52
2379.13	148.293	1463.62
1299.34	112.774	3715.1
1076.9	99.2321	608.268
454.869	227.324	892.423
1908.5	148.071	1414.56
484.838	156.507	2166.68
1083.12	104.56	1243.62
1373.93	158.949	2188.43
624.03	69.9286	1394.13
117.88	146.961	2972.52
489.278	158.061	1219.42
365.627	112.33	1373.93
639.791	72.3706	1726.68
1519.78	166.275	2316.52
2651.07	140.079	1315.55
174.489	198.242	913.068
2019.94	124.762	4350.67
1144.61	307.242	2548.73
2099.41	199.352	3417.18
1504.24	122.32	915.288
1649.21	174.711	2612
91.6842	240.643	1141.06
1617.02	279.715	2583.14
1887.63	141.411	1402.35
769.215	172.935	2946.33
199.13	99.2321	1703.59
953.249	198.908	1899.84
902.19	203.126	3192.74
1230.74	158.061	1197.22
71.0386	86.1343	3706.22
1169.47	236.425	952.805
1197.67	123.208	1557.52
1042.94	176.265	2118.06
1712.47	198.686	2820.9
2042.36	151.845	2219.96
1189.67	485.948	1159.04
396.706	94.7921	1710.7
1238.29	101.23	2661.73
1354.62	173.379	1662.3
1223.2	91.2402	598.722
1228.75	81.4724	2269.68
741.465	149.403	1325.54
591.396	71.2606	1518.01
1657.86	168.939	1390.36
698.398	263.953	3096.84
1040.27	65.0447	1236.52
743.019	162.945	1006.97
1791.5	594.06	1494.47
238.645	145.851	3266.67
2881.95	161.835	547.885
828.932	122.764	1183.68
1145.72	91.0182	2268.57
889.759	225.548	2150.92
662.435	248.191	753.453
703.06	218.222	3978.16
1248.28	124.318	1120.19
87.9103	116.326	1220.09
1765.75	145.851	1591.49
1678.73	152.067	1704.48
1079.34	151.845	1160.37
1810.82	212.006	1805.05
711.94	160.281	1108.87
1482.71	79.0305	2471.92
463.083	79.2524	2536.08
1269.82	168.273	1459.4
349.865	71.9266	1793.28
1833.02	420.016	2249.93
520.358	92.1282	2592.47
364.739	106.114	1490.92
1400.13	156.063	2811.8
1477.16	79.0305	1006.75
1579.06	281.046	3801.01
2202.2	138.525	1122.41
1268.71	115.66	1331.53
223.328	194.246	1609.47
1080.9	176.043	4677
663.767	150.291	3308.62
533.678	134.973	3771.48
1226.08	165.831	3825.65
1113.97	81.4724	3736.19
130.977	143.187	2887.5
757.671	101.452	2289
549.439	161.835	3939.31
1293.79	245.083	1581.5
143.631	196.688	2128.27
728.812	203.348	3350.36
546.553	74.5905	1546.87
1811.48	266.173	1417.89
630.468	110.776	4005.02
1136.84	146.295	2160.02
1159.26	68.5967	2957.43
1498.69	107.446	2469.04
1642.77	482.841	1376.37
759.003	108.112	2313.64
1010.97	328.332	1816.59
1070.46	129.423	1720.47
132.975	107.89	3002.49
640.235	128.535	1115.53
1427.88	238.645	1233.63
1482.26	119.878	2316.75
730.588	72.8146	2195.54
994.54	262.621	834.704
108.112	168.495	1899.17
2021.71	84.3583	2035.26
124.54	181.592	1333.97
1301.56	228.656	795.41
1989.53	127.204	3569.69
1404.34	106.336	3486.66
427.564	107.89	2670.16
302.358	196.244	1376.82
1063.58	257.737	1972.88
1008.97	134.529	4439.91
759.003	243.751	1132.84
1388.36	81.2504	1904.5
846.913	81.6944	3043.12
96.7901	94.5701	2654.18
1151.71	95.2361	3047.78
711.496	243.529	981.221
1159.93	188.252	1310
2608.89	165.387	2115.62
1083.78	121.432	2415.09
1025.84	122.098	1730.23
822.272	306.576	496.382
1120.19	214.448	2440.84
979.889	186.698	2554.5
1116.64	117.88	1349.96
1076.46	113.662	2046.13
198.464	117.214	1843.01
1308	188.696	988.991
150.957	232.651	1270.48
333.215	233.761	1974.43
1217.2	85.4683	1745.33
446.211	89.6862	2565.16
1225.19	154.287	2843.32
1125.96	132.753	1315.99
1866.1	184.478	792.746
838.7	157.173	2516.1
266.839	111.886	1159.26
1131.51	95.4581	1874.09
1356.62	108.778	1689.16
490.166	136.527	912.402
686.855	155.397	979.223
1649.65	142.299	836.036
1446.3	85.6903	2161.79
65.0447	102.34	2072.55
2478.36	144.741	1954.89
1810.82	208.454	2165.79
1573.95	278.605	2950.32
866.227	250.633	3286.42
1445.86	97.0121	2357.82
620.256	214.226	1566.4
916.842	353.195	1861.43
1280.03	82.1384	1725.35
2938.56	174.711	2967.19
772.323	104.782	692.848
447.099	144.519	1419
3066.2	191.36	1125.07
292.59	110.554	2360.7
1586.38	70.8166	1779.52
998.758	369.845	1691.61
112.774	135.639	3227.37
384.274	125.428	2719
3042.23	122.986	3803.01
2772.95	149.625	3067.09
579.853	280.824	1787.95
1333.31	100.342	1908.27
1664.97	142.965	1127.07
186.254	203.57	2374.24
242.419	73.9246	1206.1
1649.65	174.711	674.201
1676.51	148.515	2242.6
1112.2	179.816	3270.44
225.992	295.92	2322.52
1525.33	178.041	1749.77
435.777	154.953	2085.65
590.952	95.6801	2300.76
1540.87	125.428	1180.79
1325.76	162.279	1227.19
1086.67	212.894	1512.9
1912.94	111.442	1402.79
387.16	141.855	3415.63
690.628	134.973	2380.46
1158.82	84.1364	1010.52
975.005	86.1343	1881.86
230.431	106.558	2354.71
2766.51	145.185	1371.05
1252.72	275.497	1224.31
2123.17	241.753	3203.18
2257.7	159.171	2423.53
1124.85	83.9144	1413.89
432.892	159.837	1564.63
1246.06	152.955	3219.16
1877.42	96.5681	4304.94
2121.61	178.707	2199.31
1593.04	147.627	1195.89
1141.5	81.9164	1242.51
585.847	76.1445	1994.85
888.205	169.605	1403.68
1553.97	329.22	1521.34
1789.73	151.401	3471.79
309.684	65.0447	2415.09
1430.76	129.867	2734.76
687.965	118.546	3872.71
724.816	151.179	2160.91
84.5803	347.645	2948.99
870.223	124.54	1941.57
1536.43	230.431	1334.42
1092.88	242.863	3063.32
850.465	214.892	2838.21
1393.24	118.324	2828.67
1301.56	324.114	2050.8
1903.83	119.212	978.779
1581.5	136.527	3820.55
74.1465	68.1527	2137.82
566.089	176.931	2069
2085.43	86.3563	2406.65
1186.34	146.739	1835.46
1524.89	64.1567	1939.58
2697.03	332.549	2341.39
1537.32	258.181	1194.56
487.058	253.519	2343.61
742.575	194.468	1688.5
1691.61	182.48	2480.58
990.767	110.776	650.891
3514.64	131.643	1931.81
553.435	118.99	2187.55
968.567	117.88	1162.15
2467.93	88.3543	798.962
603.162	225.326	1946.46
151.845	252.409	2887.72
275.719	80.5844	5305.25
3170.1	130.977	808.73
346.535	231.319	944.147
1099.54	168.273	1044.49
1958.45	64.6007	2310.53
758.559	91.0182	3479.78
2247.93	126.538	1914.71
1325.54	132.309	3715.54
64.3787	189.806	2157.13
1160.82	70.5946	2493.68
1566.62	182.924	1703.82
1826.8	198.242	2310.97
3649.16	97.0121	1011.86
497.936	242.641	6779.08
543.889	372.287	2979.18
292.812	281.046	1081.12
766.995	259.069	1227.41
1613.91	182.258	1350.18
1736.23	99.4541	2253.26
1817.7	89.4643	2679.27
80.5844	172.713	2617.33
2368.03	70.1506	1565.51
3390.32	161.835	1263.6
925.944	105.448	3334.37
1121.74	124.318	1365.5
839.144	325.89	1237.63
1165.7	243.529	1484.48
106.114	77.6985	2059.01
1568.84	135.639	2269.68
662.657	135.195	325.668
574.081	291.48	3210.06
1183.46	66.3767	1325.54
2238.83	70.3726	2783.38
935.268	275.053	756.783
971.675	383.164	1173.47
355.193	222.44	1825.91
295.032	250.633	3864.06
1152.16	87.0223	2020.38
1915.82	263.287	2824.23
1115.08	180.26	4071.62
1036.94	144.075	2273.68
1109.31	160.947	861.121
82.1384	260.845	3139.02
3184.53	130.755	1259.16
876.661	149.403	671.093
115.882	214.448	1226.53
1001.2	126.982	2732.77
247.081	234.871	991.655
392.932	553.435	3275.32
662.213	82.3604	421.348
1062.03	218.444	2651.07
160.059	227.324	2637.75
2329.84	81.6944	1536.88
135.195	237.979	2591.13
1216.09	80.5844	586.957
78.8085	98.1221	2226.84
208.898	178.041	1624.56
1663.64	80.3624	2114.95
107.002	84.8023	1400.79
1492.03	182.924	3022.91
1030.06	189.362	3105.72
935.49	294.366	856.015
422.014	100.564	1996.18
2122.28	182.258	3233.14
2104.52	146.073	1141.28
951.917	300.138	1229.63
627.582	425.788	3123.92
620.034	77.2545	2404.21
830.486	144.075	2558.5
1692.27	72.1486	4888.12
1721.35	166.497	1850.33
2205.75	109.666	1113.97
1813.04	93.6822	2024.6
2035.7	86.1343	1698.27
399.592	307.464	1120.63
1768.42	83.6924	944.814
1140.17	216.668	2073.66
736.138	135.639	1210.1
792.968	93.2382	727.036
1499.8	86.1343	2151.36
1784.85	156.729	1374.6
2976.3	120.322	1235.63
912.624	203.792	4322.92
72.5926	74.5905	2898.6
599.388	278.605	1830.13
790.971	182.48	3658.49
1991.08	332.549	3190.97
1322.87	150.291	3111.71
1193	194.69	2998.72
1993.74	123.874	3130.36
2390.45	71.9266	3620.08
1151.49	113.218	669.539
2221.73	99.4541	654.887
1569.29	251.743	3593
1678.95	167.385	986.105
2449.06	120.544	3343.03
1112.64	122.542	3726.2
1081.34	112.552	1144.17
1909.38	182.702	680.195
1557.08	271.057	2025.04
737.47	110.998	3346.36
896.64	188.918	1399.9
853.351	105.226	2887.72
138.525	126.76	1443.86
1239.4	95.0141	3816.99
2012.61	97.4561	2466.59
895.752	219.554	802.736
1138.17	75.0345	3880.93
728.59	295.92	2629.98
565.645	78.8085	2311.2
1724.91	377.615	3931.32
789.195	94.1262	1572.17
748.347	192.47	2056.12
1266.26	74.3685	4464.33
469.743	192.914	1596.59
1169.92	207.788	984.995
1131.73	276.385	3246.91
911.736	138.081	2915.69
1839.68	162.279	1820.36
788.751	309.462	4931.41
227.102	204.68	2269.46
160.947	148.737	1404.79
1343.52	94.5701	3036.68
1405.68	176.487	2640.19
876.439	173.157	1805.27
415.132	225.104	3338.15
1609.91	68.5967	1718.91
1576.61	160.947	977.447
1506.46	142.299	3186.75
1445.86	75.9225	3208.06
341.651	185.144	2083.87
4384.41	161.169	1728.9
90.5742	158.061	1857.88
489.722	225.326	1323.09
1195.22	188.696	1654.76
1387.03	152.289	1334.19
2019.49	70.5946	2581.37
1094.22	150.513	824.048
420.904	104.338	2904.15
2309.2	83.0264	635.796
700.618	127.204	1218.31
1397.68	92.5722	826.49
661.103	151.401	2030.37
2377.35	85.4683	2305.65
693.958	274.831	1349.96
1556.41	114.772	3168.54
1052.48	86.5783	1374.82
2683.71	122.32	2469.7
1599.03	214.892	2429.3
1133.51	94.7921	3028.02
598.056	208.454	2201.31
578.521	145.851	1198.55
908.628	166.497	2490.35
387.826	230.209	1244.73
542.779	67.2647	1350.4
423.568	112.108	2927.9
1896.51	199.13	2411.54
2243.27	143.631	675.311
963.683	161.169	1016.52
689.074	164.499	1227.86
85.2463	199.352	3677.8
200.018	163.611	2005.51
644.453	90.5742	4655.91
1575.73	221.774	2350.71
384.274	234.649	3603.88
1445.86	69.0406	3632.07
1553.3	140.301	2641.75
1851.44	176.043	2745.2
1251.17	123.874	2717.45
2289.44	85.2463	1305.78
1337.52	104.782	3903.79
2183.11	161.391	1300.45
1486.04	112.552	3184.53
1511.79	102.34	1919.15
1870.31	140.523	1603.7
1260.27	343.649	101.452
1212.32	255.295	2794.7
826.268	138.747	1114.42
1401.9	159.393	1131.73
1546.42	122.542	2582.48
433.558	465.747	1594.59
1672.96	248.635	2422.19
1231.41	104.116	2495.45
1117.3	131.199	1607.47
91.6842	189.584	2400.66
4382.42	157.839	1912.71
691.96	117.436	2189.32
2060.34	256.627	2482.8
1202.77	212.45	2797.81
1329.53	248.635	1239.85
1067.13	113.44	1576.84
365.183	92.1282	2338.28
326.556	63.0468	1820.36
1160.59	447.765	1331.09
856.459	78.3645	3533.5
1238.96	148.071	1991.74
393.154	99.676	1001.87
480.621	268.615	2318.97
1155.27	109.666	1516.9
2080.1	144.297	2268.35
503.708	142.743	956.357
542.557	308.574	972.341
1232.74	98.1221	2433.07
861.343	125.872	786.087
727.258	149.847	1664.97
598.722	288.816	2250.81
894.42	237.979	1158.37
2061.9	307.02	1773.97
63.0468	124.762	848.911
527.462	80.3624	1031.61
814.946	218.444	2939.67
1475.16	151.401	1947.57
244.639	291.702	1388.58
1358.39	226.436	1359.72
816.278	111.22	922.614
1994.19	123.874	1952.23
650.669	151.401	1820.81
1183.24	130.533	2066.78
309.018	109.444	3522.85
254.851	414.244	2405.77
2036.81	229.543	2246.37
909.738	104.116	1054.7
788.973	148.515	1416.55
936.822	224.882	1359.5
836.702	431.338	2372.25
515.252	142.965	2274.79
1214.09	113.218	1254.28
391.378	186.92	1856.55
1112.64	107.224	1925.15
1783.07	222.218	1780.85
1631.45	184.034	1225.19
1514.9	97.2341	1624.12
928.164	140.967	1923.15
1197.44	242.197	1587.71
69.9286	175.155	627.36
990.767	235.759	1730.68
928.608	121.876	1087.56
671.537	210.896	2636.86
705.502	114.328	1938.47
1544.87	257.071	3057.32
310.35	130.311	4088.94
1006.31	154.287	1042.71
1512.9	157.395	2763.4
1147.5	112.552	633.354
159.837	204.014	2537.63
769.215	148.959	1220.53
1211.65	79.9184	772.101
1472.94	111.22	976.781
1393.47	138.747	2734.54
1103.76	102.34	2457.71
958.133	71.9266	2330.95
873.997	263.287	2221.29
517.25	92.7942	1364.61
1315.77	367.625	3868.94
895.086	148.071	1536.65
1158.6	154.509	971.453
3650.27	122.986	1646.32
732.586	188.252	1591.71
507.26	90.3522	706.39
533.456	154.287	1237.4
158.505	392.71	3446.48
766.551	118.102	3734.63
528.572	98.1221	2350.71
1308.44	174.489	2939.67
399.37	105.448	1155.71
2249.7	110.776	2382.01
1920.93	204.902	1435.87
1719.58	287.04	1680.06
2265.24	232.651	1512.46
2104.96	116.77	2618.22
317.01	99.0101	1268.71
956.579	64.3787	2122.5
635.796	251.743	2598.24
681.749	89.9082	2215.07
328.998	108.778	3617.86
451.317	154.731	4739.16
1319.32	107.668	4433.03
1000.53	91.9062	1400.57
1715.36	173.157	3283.98
2152.25	133.197	3844.3
1465.17	68.8187	1321.76
599.166	178.707	1972.88
2406.43	111.664	1223.2
973.673	129.423	2622.43
1649.65	108.778	833.15
656.219	182.924	1618.13
1655.2	269.947	956.135
1139.73	172.491	1309.77
1395.24	129.423	503.486
3510.86	327.888	3206.06
88.7983	124.984	3194.96
1051.37	71.4826	776.097
1394.13	166.497	1096.88
843.362	122.764	1283.36
199.352	185.366	4661.02
1052.7	134.751	1084.67
1509.57	187.364	2244.82
992.099	243.085	1080.67
772.767	435.999	1362.83
1168.14	142.299	1134.84
303.468	101.23	1501.58
1629.45	67.2647	1506.68
665.099	106.114	3684.46
1926.7	155.397	2605.12
1344.41	195.8	670.871
242.641	143.631	1523.56
1256.72	169.383	2039.47
180.482	225.548	2140.26
1099.1	140.967	1774.86
795.854	144.297	4222.58
121.654	94.3482	2394
962.573	311.016	959.243
191.804	119.434	3458.47
341.429	199.13	2042.58
1411.45	174.267	864.229
1361.72	117.214	1537.32
763.887	163.611	3354.35
637.794	141.411	1708.48
1693.6	135.639	1166.14
1755.99	67.2647	1159.26
391.156	114.994	1369.94
1462.95	194.024	2112.73
1578.83	113.662	1199.44
1048.93	91.9062	2905.04
778.983	97.4561	1494.7
1097.1	108.112	2031.7
3706.44	87.9103	2796.48
214.892	192.914	1373.49
849.355	103.672	1928.03
1199.66	90.1302	3793.02
430.006	215.114	3440.27
606.048	153.177	1701.15
946.367	143.409	2775.39
468.855	70.1506	1640.99
283.932	100.342	2371.14
1762.87	65.7107	2500.56
1170.36	133.419	2848.65
1493.14	220.22	1485.15
1364.39	155.619	1548.2
1220.75	361.187	2073
3847.85	219.776	4248.77
718.156	89.9082	774.099
1511.57	86.1343	1959.78
1345.96	151.179	2875.73
833.372	99.676	2065.89
1123.96	135.417	2053.9
1627.45	142.077	1155.71
1577.28	101.452	1405.45
848.023	161.835	1250.06
982.109	83.4704	2361.15
491.942	260.401	998.092
1647.87	320.562	4058.52
248.635	153.177	1636.33
759.669	379.835	4183.51
540.115	245.971	1916.49
1393.69	322.56	4863.48
1617.02	194.912	2780.72
148.071	100.12	1574.84
1385.92	178.263	1543.98
350.087	251.521	3004.27
1293.35	95.4581	1046.27
1593.71	74.3685	2760.07
895.752	139.191	2015.28
1220.31	437.775	2697.47
989.213	99.2321	790.083
1076.23	95.6801	927.72
1763.98	232.651	1159.04
110.332	145.629	2363.81
876.883	156.063	1636.33
176.931	182.258	749.457
463.971	255.073	2954.76
1301.34	163.389	759.225
996.317	97.4561	3253.12
99.676	101.23	499.934
1298.9	221.996	1845.01
315.456	101.008	1819.92
804.956	68.1527	2283.67
1163.48	197.354	973.673
944.814	127.648	1131.96
834.26	161.613	1754.43
1194.56	169.161	1018.29
1840.12	194.246	1261.6
1151.94	176.931	1378.59
1389.03	121.21	1442.08
1026.73	63.0468	2159.13
313.902	216.668	1855.44
78.3645	65.9327	2003.73
659.105	85.6903	1394.58
667.541	417.796	2235.5
1458.96	218.444	2739.87
273.721	270.391	1811.93
313.236	87.0223	2680.38
2051.46	208.454	1272.48
206.9	195.578	1553.75
1739.34	104.56	711.274
1192.78	166.275	2981.85
1280.03	177.375	2332.51
1409.01	104.116	1880.75
737.248	303.024	1807.04
967.235	203.126	2940.33
106.114	99.2321	1168.14
1389.03	118.102	2994.72
762.555	232.207	1947.35
423.79	235.537	1995.96
3776.59	72.3706	3154.34
825.824	247.525	1393.47
1201	340.763	1198.33
1977.09	164.943	1282.47
1088.44	101.896	687.521
1728.01	400.48	1308.22
1562.85	142.743	2710.79
2489.02	233.983	2273.24
564.757	257.293	2060.34
890.869	91.4622	664.211
786.309	214.67	1822.14
1326.2	378.725	1646.54
512.144	223.55	1815.7
987.659	409.582	2811.57
1048.26	253.519	1665.19
421.126	75.4785	3563.25
400.702	158.061	2001.96
1766.86	273.943	3247.13
2002.62	423.568	2293.22
152.733	63.2688	4368.43
452.871	301.026	2226.17
1152.82	174.045	1810.82
658.217	73.0366	1902.06
1999.07	190.25	2715.23
1417.89	91.4622	2299.21
1019.18	228.656	1669.85
1912.05	118.102	4472.55
1103.54	96.3461	2264.58
546.553	157.395	1833.02
630.024	113.44	617.37
1108.2	89.0203	1813.26
1253.17	125.206	2225.28
459.309	112.996	2012.39
1654.53	160.725	4930.97
3440.49	168.495	3636.29
1380.81	78.3645	964.127
885.319	148.293	1779.96
1708.92	192.47	1231.63
319.452	224.438	1660.53
1823.69	175.821	1183.9
820.052	202.016	3956.18
146.739	150.291	764.997
1484.48	106.114	982.331
985.439	74.8125	837.812
339.431	276.163	1926.7
645.563	159.615	1075.79
929.718	184.7	1733.34
2700.8	103.45	1307.33
75.7005	92.7942	1901.39
257.293	147.405	2605.56
167.385	175.599	1496.03
895.752	151.179	1508.24
707.5	195.578	1087.78
1832.57	279.493	2669.28
607.38	118.768	2620.88
2039.47	109.666	2059.68
609.378	200.462	1445.41
1472.05	146.739	1925.59
814.724	80.8064	1158.15
134.307	103.672	2747.2
2739.43	106.114	1902.95
156.951	103.894	2392.45
1272.92	118.99	1849.22
425.122	67.7087	2196.65
833.372	110.998	1341.08
2530.08	168.717	1799.94
853.351	171.825	2382.01
1654.31	233.983	1420.11
235.759	123.874	1038.5
2346.94	71.0386	2039.7
2582.48	74.3685	1805.93
788.529	100.12	2585.81
1373.04	78.8085	1094.22
331.662	175.155	1133.29
918.618	289.704	1723.57
790.526	268.837	846.691
1777.74	262.399	1006.75
660.437	190.916	1133.73
844.915	144.519	842.252
1336.19	235.093	891.313
1614.57	124.096	834.704
573.193	150.291	3034.46
1240.29	199.352	928.386
66.1547	212.894	1769.31
1689.16	76.8105	1429.65
3511.31	238.645	1543.76
1631.45	189.584	4035.88
1185.01	115.438	1464.06
499.712	112.33	1115.53
373.841	114.106	2085.65
488.834	129.645	3957.52
1113.09	120.766	2036.59
172.491	195.8	2378.68
68.3747	97.4561	2567.82
1417.22	128.979	1379.48
1301.34	96.3461	2049.69
3042.45	208.676	1251.39
751.011	125.206	1126.41
1145.5	322.116	2283.67
1804.16	159.171	1381.26
1275.81	355.859	782.757
1197.89	192.47	1982.42
1412.34	139.191	1453.41
1725.57	237.757	1876.53
1113.75	81.6944	1302
1236.29	64.1567	1656.75
1238.96	82.3604	2530.53
1163.04	165.165	4308.49
2672.16	196.244	2793.37
495.938	168.717	1256.5
931.938	84.3583	3065.09
696.844	154.065	2962.31
601.83	283.488	326.778
1710.7	217.334	2427.08
1412.11	178.263	2758.07
609.378	115.66	2889.05
500.378	90.7962	2356.48
1014.3	93.6822	2058.57
1456.74	62.6028	1508.02
2489.46	116.326	662.879
962.795	160.059	965.015
2228.17	89.4643	1130.4
1282.91	264.841	1553.08
1733.56	107.668	1662.53
507.704	189.806	1123.08
2712.56	81.0284	2346.27
1491.59	200.462	1264.49
952.139	75.4785	5186.71
1528.66	162.279	4851.72
1218.76	166.497	1621.9
1090.66	91.9062	1386.14
1235.41	108.556	2754.52
271.945	95.0141	1027.17
105.226	110.11	1847
204.68	341.207	1428.32
449.763	93.0162	3286.2
1262.93	96.7901	1333.75
1548.2	85.6903	1693.6
1081.56	195.8	689.074
2186.66	207.344	1165.7
2723.44	106.336	3471.57
1214.54	79.0305	2956.76
1246.73	62.6028	2816.9
1518.89	70.3726	2324.96
674.867	127.426	750.345
1997.29	120.766	2196.65
698.842	65.9327	3564.58
1573.06	175.155	2233.72
1786.84	98.1221	1564.85
101.896	77.4765	1250.72
1007.64	131.865	1552.42
1370.6	101.674	850.021
329.664	197.798	1199
77.9205	247.303	2509.88
1411	91.6842	1369.05
1666.52	72.8146	768.771
1129.74	130.089	987.881
1070.46	80.1404	1506.02
1758.65	131.199	1745.55
1605.92	126.094	1735.56
907.74	163.167	2647.08
83.2484	65.9327	1742.22
1367.94	416.242	2552.06
586.957	91.6842	2038.14
532.346	301.914	3435.6
993.209	115.882	3006.04
1250.95	111.886	941.928
2126.5	119.656	2826.67
735.694	276.607	3689.12
298.362	81.0284	3060.21
1497.36	174.933	2237.72
1294.9	171.381	954.359
1004.75	64.8227	1227.86
1028.06	88.1323	5730.37
1070.24	216.668	766.551
1192.34	72.5926	972.119
2940.33	156.063	1744.89
1399.46	214.892	2389.34
1101.1	67.4867	1915.82
3339.92	189.806	3876.04
746.571	169.383	1798.61
1936.02	197.798	1973.99
310.128	191.138	1575.95
1803.27	193.58	1488.48
1819.7	165.387	1894.73
1503.8	259.957	846.247
1616.35	222.44	1613.69
1922.26	273.055	1597.26
697.732	224.438	1319.76
1674.07	118.324	3211.61
1512.01	301.026	2311.64
734.806	78.3645	4272.75
1587.05	271.057	1996.85
3103.5	146.295	1284.24
873.775	96.7901	1300.01
788.307	210.008	1420.77
1264.27	244.861	3230.26
1381.92	521.246	2840.21
370.067	98.1221	2577.81
1177.24	242.197	2501.89
483.285	104.782	1417.66
784.533	99.4541	1647.65
5108.34	139.413	2471.48
1173.69	362.297	1055.37
1192.78	371.621	770.769
123.874	166.719	1551.97
979.223	101.23	1608.58
1380.81	145.185	900.858
642.899	128.535	3098.62
1443.86	165.165	4144.21
1252.06	153.177	4289.18
1365.94	223.55	2059.9
839.588	71.0386	2962.31
1360.39	131.199	1303.11
1267.6	123.208	2399.77
132.975	223.328	2428.85
838.034	163.611	2673.72
183.812	154.065	1098.66
1435.87	90.7962	2596.91
828.932	72.1486	2830.44
1031.61	130.533	1877.64
1876.09	241.087	1707.59
680.195	138.525	1761.31
1213.43	189.806	1076.01
337.433	255.739	2324.74
116.326	143.187	2485.46
1975.76	82.3604	3140.13
887.761	128.535	1838.35
1220.98	203.348	1574.17
873.997	89.4643	2059.45
391.6	146.517	1373.93
867.781	133.197	1202.99
1188.79	111.22	2554.5
1346.63	126.982	768.771
2316.08	115.66	1975.76
103.672	224.882	1592.15
614.262	175.821	3612.76
1302.45	93.9042	4330.25
721.708	129.867	3672.92
591.618	177.819	2090.98
1952.9	203.57	1436.09
1512.9	156.507	2044.36
1281.14	110.11	1089.11
242.863	77.4765	1821.7
2678.82	209.12	1923.37
1278.92	282.378	3349.25
1182.13	75.4785	3271.11
2308.53	142.521	2288.55
1230.3	139.191	2371.36
1591.93	85.4683	2205.08
1353.73	167.829	1965.33
2435.96	82.5824	1757.76
1012.3	88.5763	1495.14
3440.93	166.941	1700.49
1353.95	212.45	817.166
415.798	138.303	4201.27
2228.61	140.523	921.06
2281.01	196.466	863.563
744.573	139.857	6185.02
1662.97	116.326	2834.44
580.741	139.191	621.588
1260.27	145.629	1953.78
1243.18	160.503	1476.49
1484.04	205.79	1125.07
788.751	246.193	3472.01
948.365	114.994	674.645
1385.92	72.1486	2538.3
1844.56	122.098	1402.12
1555.97	186.032	2067.89
1613.69	280.824	3145.9
1619.01	151.179	2116.73
3254.68	267.727	2283
392.266	120.988	1194.78
443.547	173.823	1044.05
1031.61	98.7881	1589.27
377.171	112.996	2586.92
1131.73	175.599	2606.67
1183.01	235.093	2213.3
1514.23	171.381	1841.23
1745.55	252.631	2890.16
452.205	175.155	1278.03
1014.3	123.43	2449.06
932.604	122.986	1611.47
213.56	81.6944	2082.76
1764.87	130.755	1669.63
1655.2	343.649	2708.57
1655.2	153.177	2232.83
535.676	92.5722	2875.73
1119.08	453.759	1975.1
312.126	120.544	677.753
1306	208.676	3359.68
1036.28	100.12	1745.11
2576.93	78.5865	2377.35
1693.16	77.9205	1048.26
1540.43	129.867	1641.21
2508.99	235.759	1278.03
977.447	112.552	1240.96
1744.89	154.509	673.757
1838.79	143.409	686.855
3028.91	110.554	2995.17
580.963	169.161	999.868
1351.29	149.403	2838.88
1251.39	286.374	3210.72
1131.29	138.303	1167.7
556.321	135.195	1711.36
1202.99	77.6985	1428.1
785.643	252.187	2307.2
2904.59	133.641	789.195
935.49	85.4683	884.653
1762.65	236.647	2079.43
1921.15	302.358	2668.17
797.852	148.071	754.785
662.879	174.267	2084.1
505.262	149.625	2513.88
663.767	286.374	2442.62
1192.78	377.615	2597.57
1104.65	185.588	468.855
1517.12	320.562	863.119
896.418	293.922	1268.04
1775.74	67.7087	5269.07
1882.52	88.1323	2192.43
1187.45	97.2341	1079.34
360.743	102.562	1479.82
115.216	122.098	683.525
316.122	101.008	1739.56
1265.38	332.771	1038.94
4347.34	162.057	1986.64
243.085	118.768	2071.44
1553.53	418.684	1221.86
665.987	278.827	2137.37
783.423	76.3665	2395.56
2550.06	175.377	2635.31
1879.19	174.711	1372.82
265.063	242.641	2205.08
127.426	108.112	1846.56
1569.95	155.397	1560.41
2196.65	125.872	1960.67
874.885	235.759	4119.8
114.994	130.977	1249.84
665.543	81.4724	1313.1
1390.58	124.54	1631.45
1205.88	101.896	2529.2
885.985	202.238	1425.43
775.653	65.9327	1966.22
1193.45	166.497	1714.03
445.101	71.7046	2118.06
1264.49	77.6985	3365.9
1813.93	104.116	2893.49
215.336	176.931	2321.19
4088.27	99.2321	1411.45
1430.1	80.5844	2291.66
68.8187	95.6801	1497.14
891.979	94.1262	1193.23
515.474	123.652	1073.13
1195.89	127.648	2368.47
553.879	75.2565	1822.36
1357.5	94.1262	3090.18
3015.37	94.5701	2446.17
1723.13	391.822	2147.14
824.27	104.782	2810.02
1065.8	143.631	2504.11
2329.84	204.68	2465.04
2364.25	83.9144	948.587
1062.92	235.315	3126.36
1066.25	142.743	1099.77
1634.33	337.433	1820.36
824.27	113.662	1539.32
391.6	143.853	2723.89
894.198	360.965	919.062
672.869	115.882	2324.74
1912.27	209.342	1849.89
669.539	368.069	788.307
258.625	144.963	2901.93
780.981	63.7128	3357.46
2253.7	137.193	1868.09
1682.28	197.798	1341.08
156.729	297.474	1604.81
495.272	137.637	1248.28
669.095	118.102	1611.69
1361.94	93.6822	1026.29
925.5	140.079	1951.56
1938.91	115.438	935.046
1599.92	249.523	1577.06
1819.03	196.91	2839.77
1175.47	135.195	1139.73
309.018	179.594	1470.28
1124.85	162.501	1289.35
1667.19	176.043	1866.98
602.94	335.879	1112.64
75.7005	249.523	2223.51
1099.54	220.22	1579.06
1156.38	153.399	1198.33
852.907	219.554	2366.7
847.801	238.201	1285.35
1364.16	178.929	2492.79
465.303	185.366	1191.01
952.805	153.177	1813.04
2377.13	178.041	1324.2
1145.05	229.543	3178.31
597.834	90.7962	1302.67
3438.27	71.2606	2888.83
684.857	126.316	969.677
1189.67	303.468	1036.94
1927.81	225.548	1509.57
1013.19	110.332	2028.15
722.152	127.204	1446.75
812.948	257.737	1711.59
1255.83	271.723	1462.29
150.069	96.5681	987.881
1055.15	257.293	2020.16
72.5926	252.631	3542.61
1249.61	179.15	2273.68
625.584	126.982	2873.96
3038.9	237.091	750.789
1714.69	273.277	2869.29
1440.09	217.112	1921.15
2157.13	226.658	1207.66
559.207	130.089	902.634
365.183	186.032	1859.21
917.73	151.179	2261.91
612.486	260.179	2423.08
1037.61	81.9164	1746.44
1098.43	156.507	1103.54
239.977	192.914	3148.56
941.484	128.313	1955.12
81.4724	118.102	1637.66
888.649	325.224	1843.45
832.262	149.403	1248.28
800.516	215.114	3318.61
1535.32	269.281	1286.46
2102.08	134.751	2954.76
2034.81	107.224	5402.93
772.101	130.755	863.341
951.917	65.2667	1578.83
1984.64	236.203	2550.73
793.634	192.248	1740
643.343	140.523	2265.47
274.165	294.588	2533.86
1968.21	159.837	1847.45
1305.11	73.7026	1462.51
1211.43	225.104	3381.22
548.329	275.275	2890.83
790.526	110.998	1044.71
930.162	122.764	2602.68
871.999	154.731	2684.82
1034.06	88.1323	4473.66
1504.69	118.546	1533.1
1483.37	184.256	3003.38
811.616	278.605	3906.46
1206.55	92.1282	2257.7
1052.48	109.444	1577.72
1812.37	168.051	2536.52
1324.87	142.743	1121.74
2652.4	73.2586	3687.57
1832.57	115.66	1664.97
353.417	85.4683	2495.01
964.127	218.666	2110.73
1313.55	88.5763	1361.5
552.547	63.2688	1559.96
1016.74	145.629	977.447
828.266	388.492	1569.95
1467.39	145.629	2356.71
1162.15	79.4744	1271.81
302.802	84.8023	1593.48
867.337	166.719	3032.24
3244.69	267.727	955.469
578.077	116.992	2540.74
1493.81	232.651	3525.07
110.998	158.949	2384.23
1091.33	122.098	888.205
352.529	128.979	6146.84
897.75	135.195	1565.07
3117.48	131.199	3023.8
1126.85	122.764	3240.91
290.814	140.079	1119.3
658.883	99.2321	3186.08
1434.98	120.322	1688.05
1713.36	209.342	1634.55
127.869	229.543	1970.88
572.971	196.688	2111.18
1421.66	226.658	2033.48
1152.82	171.381	1538.87
321.45	87.4663	933.27
2687.04	239.089	4722.74
563.869	226.214	1497.58
1133.95	152.289	1966.44
1639.22	186.92	2413.76
1323.76	74.8125	1498.25
409.138	247.747	883.765
115.882	158.727	2304.54
780.537	110.332	4909.43
1152.82	430.672	3250.9
1270.48	146.961	1289.13
463.527	228.434	1150.6
546.553	237.535	2274.35
929.052	68.1527	3692.9
919.062	231.319	2062.12
1197.22	165.609	2802.92
372.953	172.935	697.732
1997.96	309.24	2153.14
1733.56	110.776	2166.46
2115.84	92.5722	4396.85
77.2545	87.0223	1472.05
627.36	168.717	1367.49
1029.62	95.6801	2107.85
2180.89	164.277	1887.63
964.127	236.203	1605.03
1097.1	87.0223	2056.12
1038.94	227.324	2410.87
1369.49	223.994	2655.96
2221.51	171.381	2476.58
859.567	123.652	2525.87
2454.83	193.802	1564.63
1362.83	136.305	1787.95
2498.12	154.509	3130.36
414.466	130.311	1740.22
73.0366	117.88	915.732
1215.87	280.159	1181.46
671.537	318.342	2005.29
2559.83	118.324	1871.87
644.453	120.322	2672.38
1076.68	152.289	1715.36
1458.96	144.741	3310.4
487.724	197.798	1578.39
1752.21	91.6842	1952.23
1064.91	102.562	2185.77
75.4785	162.723	2674.16
585.847	208.898	2340.06
327.444	119.434	2127.61
695.068	75.9225	2478.8
340.319	182.258	1114.64
1474.5	69.0406	1157.26
562.537	169.605	1551.08
1536.21	267.949	2278.79
178.263	264.619	5270.18
855.571	166.941	914.844
592.284	161.169	2521.2
627.36	91.4622	981.665
1882.75	319.896	2132.05
204.236	122.098	1035.83
633.798	165.165	842.695
1882.08	197.798	2502.56
2354.71	109.444	4119.8
1340.85	132.753	3154.34
381.833	63.2688	1233.19
1364.61	245.971	1418.55
72.5926	64.6007	1405.45
550.105	256.405	1449.63
1102.43	161.169	3504.42
772.101	98.7881	3661.82
1140.39	172.935	2896.16
1276.25	200.24	1562.41
1428.99	146.295	1296.01
1997.29	103.228	2152.47
707.056	78.5865	1224.31
722.152	166.275	1542.43
464.415	66.1547	3465.35
1862.1	278.383	2322.3
882.433	85.4683	3879.82
604.716	137.637	2793.82
1812.59	66.1547	1331.09
1100.88	71.4826	1619.68
401.812	126.538	1150.83
1189.45	76.5885	2322.52
2381.13	122.986	3523.07
914.178	122.764	2227.06
1580.61	201.128	2033.04
1127.74	195.8	5476.63
1046.27	231.541	1298.23
1836.13	164.499	1459.84
1251.61	123.208	1835.24
907.074	240.643	4053.86
701.95	188.252	3443.15
562.537	79.0305	1194.34
1892.29	107.89	2666.83
1205.21	195.8	2219.07
1004.09	100.342	1411.67
365.627	91.4622	1115.97
1406.79	208.898	2174.45
1032.28	130.977	2474.59
1023.62	63.9347	2454.16
4094.93	161.169	978.779
1336.19	118.99	1490.26
829.82	148.293	3152.56
1100.65	256.627	2329.18
407.806	184.7	1327.31
965.681	218.444	2382.24
1115.31	204.68	2709.23
1742.89	137.859	2797.59
845.581	135.639	1500.91
1974.65	160.947	2941.66
2311.86	241.087	2714.12
1222.09	285.708	1690.72
2969.41	264.397	1225.64
1174.36	125.65	2337.17
970.121	82.3604	2841.1
548.107	359.189	1413.45
1438.53	63.7128	3845.41
905.52	83.6924	751.233
547.219	106.114	1603.92
857.347	210.008	2328.07
3581.23	331.218	982.331
684.191	110.776	3944.42
2246.6	77.6985	1386.58
1108.42	124.762	2658.4
1733.79	117.658	3226.26
282.822	300.804	1194.78
1067.8	251.299	1706.92
1580.39	206.456	3122.15
1776.85	167.163	3841.41
1414.33	200.018	1242.29
608.712	232.207	1611.47
1155.27	295.032	1552.64
2857.31	176.931	1756.21
1459.4	168.273	3000.72
1331.97	83.2484	2769.62
1476.27	145.407	1731.34
1086.45	129.867	2369.58
557.209	182.702	1050.71
1539.1	78.1425	968.123
2281.23	154.509	2343.61
617.814	71.2606	2564.49
1879.19	94.1262	1716.47
544.333	140.079	1200.55
1183.9	228.656	688.631
268.393	68.1527	1391.69
2050.13	99.898	1538.65
[truncated: 11,504 more rows]
