# Supplementary material for: Repurposing the mammalian RNA-binding protein Musashi-1 as an allosteric translation repressor in bacteria
Source: eLife. 2024 Feb 16;12:RP91777. doi: 10.7554/eLife.91777 (PMC10942595; doi:10.7554/eLife.91777)
Supplement: Figure 6—source data 1. [file elife-91777-fig6-data1.xlsx]

## Sheet: fig6a
gfp mean	rfp mean	gfp std	rfp std
0.160454	3.99837	0.0707413	0.201436
0.588688	4.11315	0.355799	0.208539
39.7087	29.575	3.0207	1.21891
6.55094	22.9467	0.688256	1.45022

## Sheet: fig6b
D1	D2	D3	D4
193.295	406.02	168.84	0.67
87.435	214.735	25.795	280.06
96.815	104.52	66.33	152.76
149.41	197.315	47.57	64.32
127.635	226.125	94.47	72.36
164.15	113.9	48.24	85.09
148.07	207.365	74.035	160.8
152.09	71.355	137.35	-81.74
215.405	147.735	104.855	188.27
-3.685	93.13	115.24	-6.7
94.47	79.06	56.95	-48.24
54.605	137.35	119.26	172.86
164.485	207.7	117.25	74.37
209.375	199.325	66.665	10.05
118.925	148.07	148.07	99.16
270.345	161.135	193.295	-154.77
34.17	37.185	71.355	55.61
92.46	504.845	192.29	31.49
111.89	46.23	49.915	190.95
78.055	187.265	293.795	79.06
98.155	185.255	201.67	178.22
88.44	165.155	150.75	123.95
134.67	216.075	132.995	4.02
114.57	134.335	46.23	109.88
116.915	163.815	-4.355	118.59
250.245	284.75	52.595	119.26
149.41	214.065	206.36	83.08
109.545	60.97	64.32	454.26
124.62	129.31	78.055	107.87
200.665	150.75	111.22	-54.94
80.065	250.245	130.315	53.6
207.03	204.015	150.08	186.93
165.825	189.275	173.865	123.28
188.605	179.56	184.92	214.4
43.215	86.095	82.41	56.28
145.055	105.19	114.905	27.47
263.31	261.3	403.675	34.17
88.105	27.805	108.54	189.61
124.62	103.515	11.39	673.35
152.09	79.73	-8.71	97.82
152.425	27.805	189.275	197.65
99.16	104.185	33.165	-45.56
142.375	147.4	147.735	196.98
182.91	257.28	42.545	71.69
-1.675	135.34	182.575	54.94
97.485	182.91	154.435	175.54
107.2	28.14	145.055	29.48
68.675	35.845	51.925	96.48
126.295	205.02	28.14	116.58
212.39	69.68	9.715	81.07
139.025	173.53	88.105	154.1
283.745	178.89	190.615	-3.35
61.305	74.035	100.165	-34.84
165.49	92.795	127.635	87.77
104.185	130.985	96.145	83.08
99.16	187.265	37.52	-34.17
91.12	127.3	84.085	151.42
176.545	99.495	73.03	-29.48
172.86	81.07	128.305	-63.65
149.41	89.11	62.31	146.73
127.3	10.72	114.905	-105.19
119.26	112.895	57.955	255.94
34.84	80.735	-6.365	161.47
27.805	97.82	148.405	43.55
151.42	152.76	77.385	-192.29
209.04	77.05	363.14	168.17
274.365	242.54	75.04	50.25
189.945	141.705	62.31	79.06
91.79	330.31	217.415	40.2
154.77	144.385	148.405	79.06
173.865	127.97	160.465	211.72
170.515	110.215	-3.015	153.43
131.32	103.515	119.595	73.7
145.39	73.365	85.76	20.77
106.53	107.2	-22.78	107.87
142.04	141.37	97.82	-42.21
182.91	103.18	123.28	20.77
51.255	18.76	149.745	-24.79
288.435	51.255	146.06	131.32
43.55	216.41	213.06	25.46
172.19	159.795	163.145	188.94
-74.035	169.845	256.945	241.87
56.95	50.92	70.35	120.6
94.47	95.14	82.075	-17.42
84.085	12.395	97.15	231.15
74.035	108.875	123.615	22.11
62.31	108.875	16.75	137.35
-1.34	126.63	70.35	62.98
113.565	112.56	170.515	37.52
149.075	61.305	210.045	-15.41
201.335	270.01	152.76	-64.99
107.2	14.74	57.62	95.81
228.47	199.325	131.99	115.91
180.565	56.615	153.43	119.26
103.18	34.17	101.17	121.27
136.345	155.105	92.46	85.09
157.45	74.37	86.765	138.02
96.48	115.575	159.46	99.16
60.635	134.67	48.24	15.41
227.465	113.23	112.895	35.51
72.36	186.595	156.11	39.53
40.87	81.07	-12.395	-14.07
130.65	220.765	184.25	38.19
188.27	148.74	89.78	205.02
159.125	171.52	136.01	-11.39
14.405	113.565	184.25	-121.94
134.67	-4.69	126.295	81.07
65.66	121.27	112.895	48.91
137.685	142.04	37.52	-31.49
190.615	51.255	187.935	225.79
45.895	178.89	81.74	153.43
201.67	126.63	145.055	83.75
61.305	117.25	147.4	80.4
154.1	105.525	112.895	71.69
132.995	179.225	176.88	79.06
72.695	64.32	111.89	162.14
-48.24	94.135	77.72	69.01
-17.755	89.11	152.76	260.63
179.56	101.17	142.375	185.59
173.865	141.37	50.25	105.19
247.565	35.175	98.825	62.31
158.455	181.57	49.58	182.91
160.8	138.02	101.17	110.55
237.85	50.92	-11.725	17.42
83.415	90.785	153.765	36.85
206.36	92.125	107.2	-30.82
146.06	102.175	114.57	10.72
269.34	82.745	129.645	81.07
134.335	156.11	106.195	200.33
147.735	66.33	139.36	183.58
152.76	140.365	244.215	207.03
178.89	223.78	98.825	189.61
329.64	65.66	95.81	146.06
82.745	151.42	33.5	54.27
191.62	58.29	106.865	97.82
168.17	103.515	83.415	166.83
40.535	170.515	109.545	-7.37
122.61	194.3	-6.365	234.5
192.96	7.705	118.925	26.8
139.695	105.19	132.66	139.36
178.89	132.66	117.585	114.57
51.925	188.94	114.905	199.66
133.665	86.095	177.215	117.92
101.505	148.74	96.48	168.84
91.455	86.095	104.52	170.85
49.58	19.43	130.315	-28.14
100.165	127.97	56.95	31.49
42.88	236.175	120.265	-58.29
119.595	218.085	215.74	18.09
199.995	52.595	237.85	103.18
52.26	111.22	135.005	-14.74
149.745	64.32	35.51	158.12
129.645	120.6	126.63	-97.15
105.86	115.24	65.995	113.9
155.44	248.57	79.395	107.87
136.345	148.07	105.525	-31.49
98.155	106.865	79.395	4.69
135.005	92.125	137.015	-14.74
238.52	78.39	125.29	-170.18
134	159.125	98.49	-4.69
18.09	145.39	133.33	211.05
136.68	170.85	159.125	160.13
91.455	7.035	40.535	230.48
182.575	41.54	145.39	207.7
55.61	91.79	71.69	122.61
177.55	85.09	124.62	97.82
76.38	123.95	77.05	105.19
243.21	128.975	-38.19	81.74
11.055	109.88	88.44	141.37
485.75	138.02	109.88	200.33
94.805	204.35	44.89	26.13
78.055	164.15	153.43	28.81
77.05	37.855	128.305	34.84
161.47	21.775	116.58	10.05
32.83	46.565	178.22	158.79
185.255	63.65	105.525	156.11
118.925	71.69	13.735	288.77
97.15	73.03	71.355	58.29
203.01	34.17	154.435	49.58
77.05	55.945	21.775	69.68
141.37	122.945	142.375	176.21
229.81	60.97	232.49	144.72
137.685	169.845	78.39	10.72
107.87	115.575	129.98	132.66
182.91	152.09	82.41	7.37
138.69	52.26	72.36	117.25
212.725	25.795	37.855	302.84
159.795	132.995	55.945	156.78
251.92	125.29	165.825	95.81
136.01	416.74	135.34	-26.8
140.7	169.845	90.785	117.92
131.32	110.55	16.415	184.25
142.375	32.16	101.17	146.73
137.685	92.795	-2.345	136.68
123.615	69.345	-0.335	3.35
78.39	230.815	134	127.3
104.855	88.44	43.55	16.08
75.71	39.195	56.95	87.1
212.725	124.955	203.345	20.1
77.72	118.925	57.62	190.28
162.475	76.715	176.545	38.86
187.265	246.895	114.57	229.14
81.74	153.095	203.01	137.35
162.81	3.015	102.845	220.43
23.115	178.555	132.325	206.36
119.26	237.85	26.8	13.4
78.725	44.22	69.01	-7.37
131.655	155.105	208.705	115.91
154.435	69.01	199.995	11.39
13.735	69.345	62.98	-53.6
117.92	103.515	92.46	214.4
76.38	55.275	210.715	-9.38
163.48	301.835	79.395	60.97
159.46	298.485	34.17	152.76
81.07	76.715	57.62	217.08
125.29	206.36	84.755	116.58
115.91	170.515	96.48	145.39
95.475	216.41	131.32	129.31
149.41	118.59	106.53	193.63
105.525	131.655	37.855	81.74
262.64	132.325	112.895	85.76
13.735	215.07	100.165	105.86
96.48	303.175	106.195	132.66
137.35	141.705	154.77	185.59
251.92	83.75	122.945	44.22
194.635	112.225	72.36	32.16
239.525	203.01	62.31	131.99
115.24	157.45	172.86	-30.82
203.68	147.065	86.43	191.62
58.96	104.185	96.145	164.82
140.7	60.635	140.7	41.54
70.015	202.34	119.595	136.01
104.52	189.275	29.48	54.94
79.06	116.245	78.725	61.64
125.29	151.42	134.67	-32.83
122.275	147.065	176.21	131.32
208.705	132.325	104.52	154.77
132.66	143.715	36.18	184.92
68.005	168.505	67.335	206.36
114.905	169.845	229.475	16.75
219.09	130.315	64.32	115.91
106.195	173.865	40.2	10.72
81.405	0.67	12.06	93.8
88.44	142.375	221.435	214.4
222.105	142.375	-15.41	28.14
110.215	-34.84	162.475	5.36
60.635	119.595	74.37	-114.57
166.16	-26.465	205.355	-69.01
290.11	140.365	233.16	52.26
73.7	21.105	43.55	216.41
171.52	113.9	31.825	269.34
167.835	34.84	26.8	128.64
112.895	119.595	57.955	269.34
253.93	274.03	114.905	314.9
21.44	109.545	102.175	176.88
132.325	88.775	124.285	125.96
61.975	92.46	110.885	63.65
135.34	66.665	103.85	42.88
135.005	144.72	64.655	52.26
87.1	164.15	87.1	111.89
154.77	87.1	165.825	102.51
190.28	109.21	59.965	152.09
59.295	206.36	71.02	96.48
64.655	11.39	164.15	37.52
131.99	201	50.585	79.73
128.64	186.26	98.49	152.09
70.35	189.945	136.68	139.36
123.615	155.775	-50.25	6.7
224.115	111.89	226.795	229.14
158.12	157.45	184.25	93.8
189.61	327.295	25.795	-37.52
134.67	87.77	81.405	38.19
348.735	567.825	87.77	289.44
143.045	200.665	47.235	67.67
78.725	183.915	114.57	-53.6
305.52	29.815	82.745	194.3
197.65	92.795	136.01	-2.68
77.05	346.39	203.01	36.18
241.535	99.495	29.145	144.05
138.69	148.405	75.71	55.61
97.15	32.83	58.96	217.08
110.885	82.41	112.225	23.45
215.74	21.105	114.57	14.07
179.56	89.78	228.805	109.21
88.105	53.265	170.515	168.17
266.66	119.26	164.15	-115.24
101.505	137.685	64.99	28.14
93.8	11.055	31.155	73.03
271.015	227.465	130.315	-1.34
136.68	195.975	211.385	-75.71
70.35	132.325	264.65	115.24
195.64	110.885	74.37	225.12
61.64	148.07	279.725	6.7
83.415	72.36	-9.045	272.02
247.23	154.435	237.18	186.26
241.535	95.81	93.8	216.41
31.155	171.855	144.72	156.11
93.13	282.74	119.26	188.27
84.42	89.11	-5.695	174.2
89.445	170.85	147.065	142.71
80.4	86.095	62.98	114.57
116.915	109.545	28.81	107.2
219.76	180.565	74.705	69.68
180.23	92.46	-2.345	10.72
162.14	81.74	82.41	129.31
117.25	122.945	-19.765	46.9
208.37	119.26	150.75	83.08
99.83	463.975	56.28	10.72
196.98	43.885	25.125	-103.85
71.355	166.495	159.46	-10.05
-0.335	120.265	43.885	81.74
171.185	124.285	66.665	300.83
169.51	188.94	174.87	106.53
118.255	97.15	173.195	275.37
133.33	107.535	37.855	211.72
54.94	156.78	43.55	120.6
84.085	183.915	212.725	120.6
102.51	149.41	67.335	39.53
107.2	51.59	128.305	157.45
195.64	324.615	126.965	171.52
118.925	119.595	239.19	-94.47
309.875	66.33	174.87	252.59
14.74	117.92	79.06	107.2
135.34	84.42	143.045	68.34
116.915	101.84	101.17	108.54
55.275	134	89.445	79.73
43.885	65.66	136.345	108.54
110.215	87.435	70.685	145.39
32.495	120.6	34.84	48.24
239.525	92.125	109.545	58.29
156.78	88.775	30.485	14.07
119.595	217.415	125.96	198.32
123.95	158.12	137.35	117.92
80.4	232.155	143.715	-35.51
129.645	224.115	175.54	-1.34
220.095	168.84	91.79	69.68
162.14	60.97	102.845	81.74
181.905	58.625	142.375	174.2
119.26	104.52	130.315	56.28
223.445	169.845	232.825	71.02
120.6	174.87	61.305	10.72
117.585	78.725	123.28	122.61
143.715	122.61	142.71	160.13
128.975	-7.035	410.375	105.86
201.67	26.13	73.03	6.7
131.99	139.025	102.845	115.24
85.76	107.87	168.505	110.55
172.19	72.36	153.765	110.55
213.73	181.235	140.7	225.12
106.865	343.04	120.265	106.53
110.215	112.895	89.78	-75.71
181.235	138.69	100.165	-77.05
147.4	111.22	84.42	160.13
117.92	218.755	132.66	35.51
160.465	63.315	108.205	248.57
188.27	20.1	96.815	76.38
90.45	136.345	92.46	151.42
86.095	141.37	115.91	169.51
182.24	121.27	76.715	42.21
70.35	93.13	20.1	150.08
128.975	159.795	149.41	101.17
235.84	181.905	69.01	111.89
134.67	93.13	109.88	109.88
69.345	160.465	52.26	58.29
171.52	-76.045	183.245	113.9
74.705	21.44	57.285	235.84
104.52	211.72	-5.025	-28.81
17.085	219.425	108.875	-126.63
114.905	170.85	88.44	-18.09
124.955	200.33	46.9	-115.24
11.39	171.52	204.015	52.26
153.43	166.495	78.725	-102.51
132.995	145.055	85.425	-60.3
163.145	253.595	87.435	77.72
56.95	97.485	223.78	182.91
183.245	244.885	129.645	156.11
143.38	161.135	66.33	41.54
84.755	171.52	170.18	141.37
177.55	182.24	11.39	-42.21
166.16	228.47	197.315	198.99
33.835	217.75	54.94	107.87
96.48	143.38	144.72	34.84
80.065	119.93	201.335	170.85
225.12	162.475	2.68	459.62
81.07	56.28	51.255	-31.49
157.785	123.95	104.855	96.48
163.145	48.575	117.92	2.01
176.88	89.78	105.525	53.6
103.85	254.935	127.3	-20.1
75.04	146.73	199.66	164.15
139.695	176.545	176.545	69.68
74.705	56.28	123.95	65.66
82.075	410.375	135.005	194.97
170.18	134.335	182.91	280.73
125.96	169.51	115.24	174.87
142.04	31.155	187.265	6.03
88.44	75.04	120.265	-28.81
232.155	-22.11	63.985	67.67
53.6	141.37	102.51	144.72
201	160.465	217.08	294.8
153.095	117.25	77.72	353.76
150.08	108.205	46.23	68.34
123.28	260.63	185.925	42.21
134.67	168.505	108.875	-16.08
140.7	158.12	67.335	9.38
67	97.82	246.895	740.35
273.695	47.235	141.37	105.19
100.5	53.935	135.34	60.97
121.94	359.455	118.59	121.94
110.215	92.795	152.09	22.11
73.7	177.55	44.89	146.73
183.58	174.535	142.375	225.12
69.345	192.96	17.755	153.43
61.305	140.7	90.45	87.77
95.81	524.61	128.64	198.99
53.265	158.12	99.495	387.93
205.02	146.06	152.76	93.13
156.78	177.885	43.885	-6.7
140.03	83.75	25.46	114.57
47.235	150.75	156.445	247.23
149.41	200.33	276.04	209.04
83.75	85.09	62.98	132.66
161.47	184.25	191.62	81.74
121.605	119.595	117.92	19.43
122.275	152.09	142.71	165.49
152.76	113.23	81.74	253.26
121.27	194.97	208.705	-122.61
74.035	122.275	91.455	17.42
10.05	110.55	96.815	167.5
150.08	36.18	128.64	219.09
214.4	-3.35	102.51	-16.08
60.635	120.935	82.745	105.19
188.27	169.175	111.555	163.48
173.865	111.555	124.285	194.97
155.775	11.725	70.015	40.87
85.76	197.315	-21.105	65.66
154.77	188.27	187.6	339.02
109.21	152.09	34.17	313.56
82.41	161.805	6.7	6.03
132.995	156.445	182.575	32.16
2.345	149.075	-30.15	355.77
282.405	36.515	188.27	268.67
163.815	57.955	144.05	118.59
161.135	171.855	138.69	70.35
170.515	71.69	92.125	228.47
126.965	154.435	-24.455	-9.38
137.015	114.57	68.34	-55.61
131.655	61.975	47.57	152.76
64.655	123.95	162.14	-43.55
190.615	85.76	18.09	66.33
79.73	89.11	199.66	79.73
145.725	34.84	93.8	58.96
154.77	106.865	108.875	143.38
86.43	214.065	141.37	263.98
64.99	164.485	25.125	48.91
185.925	60.635	147.4	48.91
65.66	81.07	134.67	132.66
97.82	152.76	67.67	36.18
120.935	90.45	121.605	-58.29
103.18	186.93	21.775	-66.33
205.355	240.195	220.765	158.79
121.94	499.82	44.22	207.03
188.94	28.475	79.06	-54.27
172.86	80.735	148.405	288.1
111.22	92.46	109.88	122.61
153.095	52.93	147.065	119.93
208.705	184.92	90.45	-56.95
44.22	176.88	157.115	222.44
138.355	113.9	67.335	249.24
211.72	288.1	116.915	36.85
188.27	41.54	89.78	87.77
173.53	52.595	17.42	78.39
86.43	495.465	133.665	8.04
68.34	15.41	12.73	62.98
56.615	162.81	136.345	-4.69
18.76	209.71	117.585	299.49
80.4	129.31	225.79	113.9
156.78	214.735	108.54	162.14
155.105	33.5	89.78	22.78
101.84	79.06	97.485	101.84
93.465	112.895	192.29	-36.85
54.27	-45.895	71.355	-43.55
105.525	133.33	48.91	-84.42
167.835	46.9	240.53	-4.69
92.795	164.485	130.315	144.72
137.015	161.47	201.67	259.96
91.455	73.365	166.16	97.15
107.535	198.655	115.91	34.84
52.26	143.38	-1.675	-12.06
52.595	210.715	90.45	85.09
58.96	72.025	72.695	-0.67
111.22	53.6	15.745	207.7
114.235	42.88	73.365	213.06
52.595	178.555	49.245	98.49
176.545	76.715	75.04	-44.22
53.265	145.725	48.24	186.93
124.955	85.425	-5.36	28.81
97.82	119.26	135.675	261.3
174.535	-12.395	94.47	-64.32
33.165	-11.725	324.615	249.91
117.585	141.705	77.385	65.66
151.42	15.745	155.44	181.57
136.345	-23.45	135.005	-156.11
17.085	65.325	24.79	69.01
62.31	89.78	212.39	166.16
85.09	94.135	119.595	-116.58
289.105	101.505	187.935	167.5
171.855	167.165	148.405	107.87
121.27	68.34	97.82	127.3
272.69	155.105	100.835	114.57
81.74	195.64	124.955	-52.26
150.75	12.395	104.855	118.59
68.34	257.95	178.555	50.92
11.39	218.085	155.105	182.91
3.685	135.005	73.365	-39.53
185.59	171.855	94.805	71.02
141.37	156.78	80.735	254.6
94.47	122.945	115.575	-32.83
34.84	77.05	15.745	30.15
146.73	137.35	247.565	-56.95
323.61	45.225	41.54	310.88
250.58	47.57	119.26	162.14
190.615	167.5	189.61	-33.5
137.685	-7.705	51.925	-46.23
29.145	270.01	61.975	106.53
121.94	171.52	20.435	95.14
208.37	49.915	289.44	113.9
141.035	98.155	214.4	37.52
176.545	143.045	34.505	52.26
147.065	113.9	77.385	154.1
27.47	7.705	146.06	251.25
166.83	91.12	11.055	167.5
53.6	215.74	-1.675	201
42.545	98.825	251.585	203.01
85.09	346.39	247.23	87.1
131.655	66.665	220.43	187.6
139.695	175.875	161.805	196.31
117.25	250.58	101.84	-22.78
135.675	89.445	166.495	136.68
233.495	74.705	94.135	241.87
197.65	123.28	100.165	-83.75
173.195	124.955	47.905	74.37
131.655	2.01	54.94	16.08
127.97	111.22	124.285	181.57
111.22	144.05	45.56	18.76
134.67	119.93	295.805	-71.02
67.335	39.53	80.065	222.44
173.53	42.21	202.675	160.13
94.47	115.91	205.02	73.7
125.625	180.565	15.075	-3.35
129.31	78.725	62.645	114.57
84.755	40.535	87.435	112.56
172.19	85.76	113.23	103.18
5.36	168.505	92.125	57.62
139.695	175.54	33.5	199.66
82.745	56.615	219.76	105.19
34.505	49.245	119.93	126.63
47.235	137.35	52.93	179.56
130.65	198.32	21.44	255.94
200.33	247.23	168.84	104.52
164.15	113.9	70.015	115.91
221.77	113.9	148.74	60.3
52.93	89.11	43.885	-91.79
118.925	275.035	2.68	230.48
116.915	57.955	172.19	-8.71
109.545	8.71	-56.615	89.78
142.375	204.685	184.25	117.92
216.745	92.125	207.7	17.42
199.325	125.29	153.43	82.41
65.66	121.94	42.21	-48.91
77.05	217.415	126.965	52.93
189.275	52.595	78.725	-47.57
325.285	398.985	44.555	83.75
75.71	315.905	69.345	94.47
125.96	253.595	169.175	91.12
53.265	152.76	104.185	-65.66
148.74	163.815	92.125	-52.93
233.83	193.295	127.3	-69.68
241.535	82.075	155.775	83.08
68.005	12.06	220.43	121.27
109.21	195.305	102.175	39.53
152.76	210.045	106.865	0.67
81.405	110.55	134	-89.78
233.83	75.71	128.64	-40.87
236.51	183.58	148.74	143.38
92.46	49.245	183.58	10.05
53.265	151.085	150.75	274.03
156.78	81.405	55.945	34.84
74.705	51.925	456.605	161.47
-19.43	99.83	192.625	-55.61
22.78	222.105	172.19	87.1
129.645	65.995	-32.83	-6.7
36.85	182.24	152.76	188.94
116.58	10.385	171.185	6.7
171.185	152.425	-8.71	71.02
179.895	221.435	133.665	318.25
126.63	104.185	126.63	231.82
187.265	191.285	108.205	166.83
103.515	245.555	62.31	14.07
48.24	17.42	124.62	20.77
111.89	203.01	119.595	57.62
198.32	331.985	18.09	116.58
183.245	30.485	179.56	175.54
51.59	15.745	117.25	97.15
160.8	103.515	132.995	-25.46
87.77	24.12	94.47	146.06
94.47	91.12	149.41	95.14
196.98	43.55	40.87	41.54
161.135	162.81	36.18	117.25
127.635	38.86	132.995	105.19
260.63	179.225	160.13	30.82
93.8	136.345	90.115	14.07
154.77	268	129.31	-0.67
210.045	167.5	149.41	143.38
161.135	316.24	120.6	191.62
155.775	69.01	152.76	130.65
128.64	247.565	69.68	214.4
113.23	124.62	53.935	-103.18
81.405	140.7	108.205	69.68
116.915	48.24	184.92	208.37
271.015	18.425	120.935	102.51
69.01	44.22	210.38	4.69
171.185	38.525	34.84	44.22
210.045	70.015	220.765	64.99
16.08	68.005	124.955	141.37
230.145	67.67	129.31	-2.01
138.355	186.93	15.745	172.86
146.395	202.675	139.695	-52.26
212.725	131.99	86.43	247.9
181.57	259.29	69.345	730.97
296.81	195.305	238.52	115.24
74.035	216.075	149.41	163.48
119.93	138.69	420.09	121.94
2.345	124.62	60.3	77.72
130.985	38.86	125.96	-30.15
142.71	123.95	97.15	253.26
75.71	187.6	126.295	48.91
49.915	18.76	59.295	161.47
293.46	28.81	75.71	192.96
224.45	95.14	147.065	379.22
51.925	110.55	110.215	18.09
185.59	150.415	144.05	95.14
198.99	213.73	133.665	172.19
123.95	168.17	32.495	1.34
141.705	169.175	71.69	193.63
150.75	132.66	48.91	71.69
187.935	110.885	81.07	37.52
146.395	136.68	161.805	77.72
112.225	191.955	120.265	-62.31
160.13	126.295	109.545	12.73
173.195	84.755	49.245	239.19
3.35	22.445	157.45	121.27
146.73	21.105	114.905	101.17
158.79	143.715	104.52	241.87
131.655	214.735	103.85	108.54
37.185	99.495	143.38	114.57
252.925	93.8	153.765	106.53
119.595	30.485	105.19	60.3
20.1	167.165	63.985	180.23
312.555	28.14	93.8	30.15
135.005	154.77	107.2	186.26
110.55	150.415	163.48	-86.43
138.69	147.065	180.565	-16.08
29.815	6.03	71.69	-40.87
145.725	72.025	36.85	203.01
151.085	106.195	109.21	225.79
106.53	115.91	125.96	79.06
114.57	148.405	218.755	-44.22
162.475	72.025	50.25	105.19
57.285	176.88	135.005	95.81
220.765	138.02	287.095	24.12
151.755	56.615	134.335	-53.6
182.575	155.775	76.045	63.65
132.995	26.8	63.65	265.32
118.925	92.795	123.95	180.9
85.09	266.995	100.835	-81.07
148.405	59.63	158.455	8.04
141.035	155.44	126.295	98.49
366.49	117.585	63.65	308.2
146.73	221.435	218.42	213.06
141.035	127.3	62.645	253.26
185.925	98.825	154.1	148.07
153.43	106.865	96.815	144.72
50.92	225.455	186.93	37.52
194.635	62.98	96.815	32.16
76.38	171.855	84.085	157.45
207.7	56.28	137.015	156.78
166.495	218.085	83.08	203.68
166.16	136.68	96.815	88.44
191.62	137.015	127.635	105.86
48.91	558.445	254.935	5.36
58.96	148.405	115.24	129.98
202.675	31.825	205.02	131.99
108.875	31.49	234.5	54.27
-3.685	112.56	131.99	71.02
72.025	194.3	46.23	191.62
65.66	135.34	59.295	65.66
112.56	176.21	160.8	2.01
-37.855	126.295	188.94	150.08
95.14	161.805	78.725	164.15
117.25	97.485	-40.87	91.12
83.415	130.315	98.49	124.62
64.655	200.665	110.215	211.05
163.815	260.965	85.09	7.37
-9.715	100.165	101.505	-82.41
29.145	15.075	159.46	143.38
105.525	89.445	151.42	152.09
134.335	36.515	208.035	295.47
51.925	26.465	132.66	-22.11
151.755	104.185	120.6	85.09
219.09	180.565	116.245	157.45
223.78	144.385	65.66	-38.86
68.675	-19.095	84.085	147.4
66.665	249.575	71.02	73.03
144.05	158.12	179.895	123.95
327.965	196.98	88.775	107.2
130.315	132.66	111.89	242.54
23.115	388.935	138.355	154.1
68.675	48.24	141.705	178.89
189.275	118.255	74.035	105.86
63.985	220.765	67.335	86.43
54.605	55.275	156.445	229.14
368.5	161.47	89.11	-54.27
89.78	129.98	40.87	43.55
141.035	263.645	96.145	63.65
107.2	104.52	197.985	21.44
98.155	164.82	156.445	138.69
59.63	177.55	103.515	131.32
180.565	109.545	86.43	170.18
163.48	61.975	137.35	150.75
190.615	78.39	235.505	20.77
81.07	87.77	-26.465	62.98
109.88	270.345	21.105	61.64
118.925	26.13	97.82	151.42
45.56	76.045	149.075	78.39
123.28	124.285	21.775	188.94
114.235	287.43	148.74	-26.13
80.4	144.05	91.12	4.69
80.065	127.97	-10.05	27.47
43.55	285.42	21.775	258.62
118.59	51.925	96.815	180.9
189.61	116.245	70.015	56.28
160.13	54.605	108.54	378.55
42.21	238.52	99.83	147.4
165.825	231.485	15.075	31.49
234.5	187.265	46.9	215.07
233.495	212.055	95.14	140.7
63.985	120.265	174.87	205.02
164.82	104.855	142.71	132.66
125.96	171.855	149.41	132.66
317.245	122.61	88.105	224.45
100.165	126.965	145.39	80.4
148.07	74.37	39.195	196.31
171.855	110.55	62.645	174.87
142.375	113.9	87.435	122.61
160.13	163.815	163.815	86.43
129.31	87.435	184.25	-43.55
29.48	124.285	99.495	79.73
60.97	189.945	186.93	56.95
141.37	118.59	147.4	-55.61
192.96	107.2	105.19	16.08
111.89	225.12	79.73	58.29
74.37	119.26	62.98	339.02
147.065	113.565	217.08	-24.12
146.395	286.09	255.27	-25.46
158.12	116.245	156.11	-15.41
119.595	155.105	88.775	253.93
263.31	0.67	48.91	78.39
157.785	150.415	105.19	272.69
98.155	101.505	60.3	88.44
151.42	88.44	181.905	-53.6
40.535	224.785	45.225	56.28
152.76	212.725	47.905	294.13
17.755	105.86	77.385	104.52
191.62	144.05	102.845	90.45
165.155	194.97	140.365	153.43
-25.795	241.87	107.2	38.86
142.71	101.505	43.55	219.09
151.42	36.18	86.095	-34.84
76.045	310.21	117.92	-41.54
192.96	147.065	179.56	-24.12
156.445	146.395	102.51	34.84
188.27	38.86	124.62	162.14
136.345	-1.34	179.225	166.16
79.395	144.05	104.185	134.67
125.29	81.405	85.425	121.94
162.81	168.84	284.415	212.39
307.195	175.205	46.9	244.55
239.19	134	181.905	101.84
52.595	185.59	82.075	3.35
69.345	193.965	30.15	249.91
-3.685	134.335	-62.98	103.85
25.46	168.84	105.525	8.71
90.785	85.425	183.245	111.89
26.8	173.195	98.155	-75.04
91.79	53.265	138.69	81.74
-1.34	211.05	98.825	11.39
93.465	85.425	240.195	48.91
233.495	384.58	215.07	129.31
163.815	197.985	53.935	97.82
310.21	107.2	122.945	78.39
246.895	79.73	78.725	179.56
59.965	61.305	105.525	-2.68
226.46	34.17	235.17	156.78
63.315	137.015	26.13	186.93
28.81	-2.68	145.39	74.37
181.57	174.535	243.88	25.46
188.27	714.22	232.155	85.09
132.66	218.42	188.605	-5.36
152.76	116.245	169.845	-68.34
149.745	135.675	118.925	-41.54
16.08	26.8	204.015	274.03
156.11	39.53	204.35	51.59
160.13	232.825	13.065	36.85
109.545	177.215	158.12	261.3
137.015	184.585	117.92	95.14
342.705	53.6	120.265	-32.83
164.15	116.245	134.335	0.67
185.59	63.315	148.405	218.42
130.315	120.935	169.51	109.88
163.145	145.055	31.825	34.84
165.155	158.79	89.445	6.03
80.065	179.225	92.46	67
133.665	138.02	184.92	166.83
242.205	186.93	181.905	182.24
29.145	12.395	52.595	4.02
82.745	89.11	254.6	198.99
108.875	266.66	125.625	61.64
145.055	126.965	134	-75.04
150.415	84.42	88.775	124.62
68.005	60.3	150.08	-5.36
152.09	127.3	114.905	54.94
161.805	535.665	185.255	106.53
141.035	57.62	106.53	-20.1
105.19	188.27	94.47	158.79
93.465	294.8	97.82	49.58
244.215	139.025	157.45	149.41
125.29	156.78	-11.39	111.22
166.495	83.75	159.795	481.73
28.14	64.99	194.3	20.77
195.64	281.735	101.84	117.25
183.58	162.14	40.2	263.31
174.87	113.9	264.985	-79.06
157.115	69.345	55.275	75.71
94.135	207.365	144.385	-61.64
103.515	-21.105	189.61	160.13
59.965	92.46	22.11	-20.1
256.61	152.76	131.32	249.91
36.18	112.225	95.14	-89.78
173.195	47.57	105.525	43.55
77.05	12.395	57.955	100.5
159.46	69.01	104.855	223.78
14.74	47.235	175.875	272.02
134	143.045	100.835	171.52
35.51	54.27	98.155	150.08
145.055	71.02	3.35	142.71
175.875	121.94	39.53	173.53
89.78	167.835	192.29	238.52
141.035	94.47	56.95	122.61
89.11	10.385	128.305	190.95
120.935	154.77	273.695	119.26
70.015	152.76	156.445	-60.3
82.075	225.12	132.325	22.78
41.205	205.69	291.45	112.56
98.49	121.94	105.86	127.3
141.705	244.55	59.965	123.28
117.25	192.625	77.05	36.85
146.395	376.875	69.345	-22.78
199.66	108.54	81.405	70.35
152.09	83.08	102.51	300.16
37.52	47.57	32.16	109.21
43.885	112.225	34.505	130.65
84.085	-19.095	85.425	137.35
77.385	99.83	42.545	236.51
175.875	115.91	32.16	89.78
164.15	162.14	121.27	47.57
135.005	63.985	153.43	115.91
169.845	175.54	87.77	-61.64
212.725	97.82	95.14	77.72
123.95	363.14	230.815	186.26
138.02	348.065	75.375	144.72
112.225	57.62	87.77	123.95
96.145	182.91	204.685	58.96
88.775	18.09	93.8	24.12
61.975	132.66	190.95	259.29
101.505	228.805	153.095	78.39
33.835	137.685	263.645	284.08
177.55	169.51	84.755	-107.87
209.375	112.56	109.88	261.97
77.05	120.265	59.63	60.97
43.55	56.615	8.375	-28.81
98.49	114.905	136.345	56.95
222.775	130.65	178.89	-141.37
180.9	129.31	120.935	69.01
106.53	284.08	127.635	-23.45
149.745	48.24	198.32	35.51
95.14	204.015	155.105	38.19
402.335	12.395	106.195	187.6
142.04	147.735	35.175	118.59
120.6	197.985	108.875	169.51
55.61	124.955	73.365	119.93
246.225	398.315	64.655	91.12
177.885	434.16	200.33	182.24
229.475	161.135	61.64	107.87
124.285	70.35	108.205	-12.06
87.77	42.88	46.9	188.94
137.015	82.745	205.02	170.85
82.075	194.97	181.905	40.87
103.85	97.82	154.435	97.82
122.61	99.495	99.495	218.42
293.46	65.66	183.245	80.4
127.635	66.33	110.55	91.79
105.525	107.535	87.1	187.6
271.685	166.495	251.92	60.3
96.145	87.1	138.02	205.69
58.96	509.2	59.63	-6.7
69.345	163.145	73.7	222.44
141.705	136.68	244.215	122.61
83.415	35.51	94.47	30.15
135.34	107.87	61.305	371.18
126.965	-5.36	106.53	150.08
126.63	86.765	64.99	-8.71
148.07	123.28	246.56	2.01
90.785	150.08	1.34	209.71
135.34	187.935	49.58	119.93
257.28	155.105	203.68	221.77
-3.685	116.245	44.89	152.09
25.46	88.775	59.63	60.3
67.67	140.03	104.52	-22.78
162.475	85.09	112.895	-49.58
143.715	161.805	95.14	75.71
135.675	56.28	81.07	141.37
79.73	95.81	178.89	64.99
216.41	137.015	171.52	64.99
266.325	116.58	168.505	151.42
133.33	119.26	116.915	477.71
414.06	81.74	119.26	64.32
131.99	190.95	123.95	217.08
100.165	154.435	96.48	85.76
148.405	184.92	20.77	46.9
114.235	86.43	134	207.7
112.225	686.08	35.175	26.8
48.575	150.08	37.855	56.28
223.78	171.185	72.36	124.62
191.62	132.995	176.88	166.83
210.38	90.115	112.895	7.37
223.445	190.615	121.605	82.41
157.785	135.675	92.46	-67
143.38	111.89	106.865	-94.47
225.12	30.82	139.695	19.43
206.025	74.705	86.095	44.22
258.62	113.565	115.575	143.38
92.46	197.315	86.43	55.61
89.11	21.105	99.16	7.37
102.51	95.14	162.81	-40.87
96.145	112.895	61.975	-72.36
44.22	98.825	141.705	171.52
104.185	169.51	141.035	109.21
89.78	58.96	81.74	-90.45
128.975	136.01	83.75	28.14
172.525	225.12	-7.035	87.77
255.605	51.925	110.215	96.48
248.235	147.735	141.37	66.33
123.28	-26.8	83.415	138.02
104.185	96.815	121.94	51.59
143.715	236.51	74.705	10.05
218.085	209.04	130.65	-53.6
91.79	169.51	219.09	0.67
243.88	45.56	118.925	212.39
25.46	164.485	126.63	-8.71
80.065	92.46	46.23	209.04
107.535	74.37	168.84	110.55
156.78	102.845	-41.54	194.3
159.795	50.585	100.165	18.76
128.975	293.46	223.11	253.26
268.335	156.11	92.795	219.76
173.865	268	-10.05	184.92
83.415	241.535	93.8	81.74
195.64	135.675	127.3	-59.63
37.855	107.87	84.755	-53.6
143.715	178.22	57.955	127.3
186.595	65.325	142.71	6.7
166.16	165.155	50.25	11.39
104.185	124.955	134.67	-14.74
162.14	83.08	131.99	233.83
162.14	273.025	50.25	12.73
98.155	185.59	155.775	195.64
108.54	93.465	26.465	-32.83
230.48	219.09	260.965	165.49
242.205	197.315	235.84	107.2
132.66	140.03	138.355	193.63
213.73	114.905	52.595	83.08
88.44	238.52	54.94	196.31
57.62	109.88	14.74	166.83
187.265	86.095	158.12	91.79
160.13	193.965	72.695	-24.79
175.205	222.44	48.575	175.54
148.405	13.065	182.91	166.83
95.14	132.66	75.71	107.2
68.005	129.645	183.58	172.19
35.845	143.715	110.885	-91.79
113.565	182.24	127.97	14.74
69.345	141.37	41.54	785.91
142.04	172.19	153.765	-55.61
126.965	209.04	50.585	117.92
205.69	-18.09	-6.03	109.21
152.76	58.625	117.25	55.61
276.375	-55.61	110.885	158.79
120.6	120.265	56.28	190.28
195.975	157.785	50.92	15.41
25.795	51.59	118.255	136.68
250.58	224.115	151.755	88.44
137.35	35.175	113.565	17.42
77.385	97.82	232.155	43.55
49.58	209.375	39.53	184.25
50.92	137.685	77.05	249.24
174.2	138.355	93.8	40.87
111.89	189.61	144.72	207.7
121.27	51.59	371.85	-10.05
261.97	105.19	111.555	176.88
124.285	111.89	174.87	126.63
123.28	183.245	74.035	168.17
163.145	80.065	109.88	-28.81
191.955	108.875	281.065	67
238.52	48.24	185.255	16.08
207.365	226.46	132.995	-8.71
140.7	160.8	88.775	112.56
122.275	270.68	237.85	157.45
65.995	77.05	48.91	-69.01
159.125	57.955	260.63	39.53
110.55	27.135	164.15	67.67
118.59	104.855	128.975	180.23
59.295	266.325	113.565	-44.22
159.125	93.8	82.41	103.18
95.475	142.71	120.6	56.95
90.785	98.825	112.225	-22.78
14.07	144.385	74.035	90.45
173.53	156.445	186.93	42.88
211.72	97.15	153.765	-39.53
104.52	135.005	56.615	152.76
87.77	626.45	179.895	-85.76
196.31	190.95	-14.74	143.38
207.03	199.66	30.15	106.53
191.955	35.845	75.04	-56.95
206.695	74.37	154.435	-6.03
347.73	159.125	156.11	221.77
142.375	99.16	87.77	180.23
57.955	71.69	142.71	156.78
243.88	25.795	28.81	54.27
137.685	77.72	114.905	166.16
213.73	61.975	175.875	52.26
50.92	17.085	89.78	66.33
83.75	189.61	123.95	122.61
162.81	275.035	107.535	64.32
131.655	136.01	118.255	157.45
215.405	236.51	80.4	42.21
-9.045	124.955	112.225	-12.73
236.51	110.885	85.09	-50.92
152.425	23.785	191.285	22.78
135.34	104.52	152.76	-15.41
213.395	143.045	87.77	11.39
88.105	68.34	65.66	58.29
164.485	244.55	101.84	32.16
166.495	133.665	148.07	146.06
273.695	313.56	119.595	156.11
218.755	188.605	63.315	316.24
184.92	53.6	71.69	34.17
76.38	125.625	134.335	172.86
140.365	162.14	67.335	48.24
92.125	117.585	79.73	56.95
154.1	45.895	155.105	138.69
97.15	52.595	129.98	60.3
115.24	27.47	-2.01	144.72
210.38	195.64	209.375	2.01
76.715	184.25	17.755	125.96
165.49	157.45	159.125	125.29
62.31	235.84	135.34	104.52
178.89	72.695	16.415	324.28
55.61	122.61	156.445	-37.52
150.08	79.73	242.875	-117.92
20.77	110.215	141.705	270.68
191.285	129.98	-25.795	5.36
116.245	229.81	107.87	-61.64
189.275	130.315	63.315	-36.18
126.63	91.455	93.465	124.62
118.255	40.535	79.73	408.03
350.745	206.695	51.255	-24.79
163.48	333.995	116.915	39.53
190.28	101.84	90.785	144.05
81.07	70.015	97.485	198.32
131.32	130.315	24.455	92.46
187.6	132.66	141.37	91.12
124.955	86.43	43.55	44.22
69.68	147.065	189.275	163.48
40.2	71.69	42.545	72.36
151.755	103.18	142.04	138.02
374.195	97.485	177.885	54.94
84.42	225.12	125.96	30.82
220.095	122.945	140.7	72.36
151.085	47.905	61.305	223.11
154.1	198.99	93.465	52.26
49.915	113.9	40.87	84.42
298.82	80.065	109.545	-23.45
159.795	272.355	193.295	-47.57
93.13	144.72	51.59	111.22
142.375	84.085	180.23	201.67
197.65	143.045	53.265	58.96
210.715	44.555	113.565	40.2
169.175	236.845	116.58	66.33
307.195	101.84	178.555	111.22
103.18	42.21	102.175	67
107.87	178.89	177.885	132.66
164.15	-11.39	49.58	92.46
200.665	66.33	81.07	-130.65
251.25	184.25	80.065	-10.72
70.685	85.09	116.58	181.57
99.83	127.3	127.635	-62.98
229.475	143.38	148.74	-23.45
36.515	22.11	56.28	192.29
141.035	176.21	89.445	91.79
80.735	113.565	185.255	129.98
83.415	57.62	26.13	43.55
96.815	230.815	90.785	406.69
101.505	151.755	210.045	127.97
131.655	274.7	140.03	81.74
83.08	143.045	81.405	11.39
70.685	216.075	98.49	36.85
111.89	9.045	158.79	215.74
49.245	121.94	97.485	129.98
41.875	49.915	60.635	353.76
99.495	122.275	193.965	50.92
93.13	2.01	189.275	168.84
111.89	126.295	165.155	-90.45
127.635	188.605	112.225	345.72
159.795	199.66	107.87	-23.45
89.78	150.415	250.58	53.6
137.015	116.245	128.975	145.39
97.15	80.735	160.465	79.73
209.04	26.8	165.155	-0.67
106.53	180.9	109.21	-4.02
187.935	11.39	93.8	4.69
99.83	136.68	66.33	196.98
162.81	98.49	80.065	58.29
114.235	142.375	67.335	221.1
115.24	119.595	58.29	115.91
83.415	216.075	101.17	179.56
192.625	130.985	37.52	192.29
156.11	146.73	215.74	276.71
131.32	179.895	141.035	148.74
128.305	8.71	113.23	307.53
226.46	50.92	116.58	34.17
100.5	137.35	131.99	24.79
112.56	103.85	159.795	286.76
107.535	28.475	23.115	181.57
116.915	189.275	82.41	190.95
373.525	95.475	115.24	88.44
107.535	211.72	124.955	48.24
33.165	164.15	65.995	62.31
184.25	11.055	83.08	199.66
107.2	96.815	112.225	132.66
111.89	37.855	103.18	32.83
98.155	165.825	88.775	123.95
8.375	28.475	57.955	156.78
74.705	94.47	133.33	173.53
127.635	106.195	51.255	98.49
108.54	342.705	112.225	73.7
115.575	86.43	152.76	67
204.685	8.375	46.23	87.77
107.87	66.33	179.895	135.34
169.175	178.89	50.25	96.48
107.535	86.43	73.03	152.76
176.545	93.8	140.03	83.75
228.135	162.14	149.41	82.41
174.2	46.23	57.285	95.14
153.765	26.8	120.6	56.28
177.215	123.28	99.495	77.05
209.04	94.47	148.74	28.14
155.775	109.545	72.695	71.69
159.795	9.045	128.305	167.5
246.895	94.805	107.87	-49.58
149.745	96.48	122.275	46.23
135.675	24.79	120.6	91.12
232.155	348.065	84.085	125.29
97.82	90.115	165.825	25.46
93.465	187.265	59.63	-126.63
219.09	372.855	102.175	237.85
104.185	59.63	142.04	93.8
137.685	218.755	105.86	115.91
173.195	202.675	58.625	148.74
160.465	138.355	170.18	49.58
131.99	263.31	236.51	-34.17
113.565	143.045	55.945	-94.47
116.915	145.055	142.71	280.06
148.07	195.305	117.585	2.01
111.22	152.76	56.615	-9.38
88.44	463.975	74.37	-79.06
67.335	115.24	175.54	75.71
90.785	78.055	189.945	-57.62
54.27	32.495	12.06	161.47
42.21	97.15	71.69	157.45
43.55	222.105	96.48	220.43
145.725	162.475	155.775	32.16
138.355	108.875	47.57	101.17
136.345	100.835	55.945	121.94
140.7	123.28	182.575	322.27
92.125	715.225	110.55	158.12
64.655	256.61	78.725	40.87
134	38.86	124.285	133.33
144.05	80.735	214.065	97.82
237.515	202.34	26.465	140.03
149.745	166.83	170.515	-40.2
141.035	105.525	121.605	160.8
166.495	147.735	145.055	-51.59
253.93	158.79	103.515	-12.73
153.43	146.395	122.275	-36.85
125.625	92.46	59.295	101.17
183.58	40.87	221.77	113.23
212.39	-23.785	105.86	94.47
113.23	168.84	164.15	86.43
71.355	172.525	174.87	310.88
116.58	144.05	69.01	161.47
155.105	241.87	30.82	71.69
471.01	190.28	96.145	4.02
141.035	220.765	119.595	91.79
301.165	51.59	21.44	-48.91
110.885	102.845	193.63	157.45
144.05	288.435	66.665	-30.82
114.905	122.945	92.125	206.36
116.245	66.33	176.21	24.79
65.66	62.645	84.085	-85.09
71.69	-3.685	103.85	73.03
176.21	298.82	110.215	221.77
154.435	121.27	130.65	30.15
107.2	196.31	250.58	120.6
121.94	198.32	117.25	153.43
115.91	74.035	89.11	7.37
99.495	116.915	119.26	38.19
111.555	-73.7	155.775	28.81
116.915	318.585	130.65	-99.83
158.12	133.665	93.13	-85.09
62.645	80.065	137.35	4.69
66.665	143.715	144.05	178.22
203.345	459.955	143.38	-68.34
82.745	83.08	85.76	371.85
191.62	112.895	276.71	239.19
-11.055	53.6	128.64	31.49
121.27	109.545	-18.09	160.13
88.775	84.085	139.025	316.24
103.515	268.67	265.655	8.71
146.395	176.545	176.545	-21.44
21.44	234.5	145.39	243.21
47.905	148.07	106.195	50.92
230.815	108.54	43.55	-7.37
127.635	6.365	65.66	123.28
93.8	135.005	260.965	118.59
57.62	154.435	122.945	164.82
43.55	55.61	63.315	154.77
244.55	158.455	178.555	239.19
56.615	94.47	82.745	40.87
215.74	113.9	86.43	-38.86
87.1	31.155	30.15	182.24
134.67	64.32	50.92	79.06
107.2	90.785	116.915	27.47
13.735	349.405	102.845	-77.72
160.465	0.67	2.345	270.01
161.47	35.51	32.83	27.47
192.625	83.08	27.805	83.75
202.675	65.325	125.96	73.7
256.945	131.32	155.44	131.32
116.58	149.745	116.58	23.45
110.885	169.845	99.495	25.46
51.59	209.04	285.755	146.73
145.39	187.6	94.47	131.99
114.235	186.26	77.72	-32.83
151.085	68.675	333.66	73.03
286.76	62.31	58.29	229.81
121.27	173.195	231.82	77.05
141.705	86.43	177.885	60.3
170.85	40.87	143.045	10.05
21.105	204.35	89.445	123.28
131.32	126.295	92.46	-40.87
174.87	46.23	27.47	259.96
93.13	178.89	168.505	101.84
169.845	123.615	42.21	166.83
38.525	188.27	176.21	243.88
77.05	12.73	80.4	131.99
117.585	210.715	46.23	-77.72
40.87	140.7	259.96	166.16
141.705	197.985	95.14	-47.57
197.985	230.48	45.225	175.54
224.115	109.545	96.145	101.84
64.32	143.045	210.38	33.5
99.495	259.625	81.405	-12.06
253.26	141.705	79.06	252.59
122.61	137.35	155.44	50.25
139.36	186.26	81.74	-30.82
97.15	95.14	242.205	-14.07
70.015	391.95	102.845	122.61
220.43	44.22	152.09	223.78
253.26	192.96	34.505	165.49
138.02	133.665	120.265	198.32
40.87	151.42	56.28	166.16
61.305	14.74	82.41	176.21
79.06	162.475	201	71.02
224.45	134	192.29	164.15
186.595	185.925	133.33	38.86
170.18	207.365	180.9	109.88
148.74	531.645	131.32	172.19
135.675	76.045	23.115	-62.98
134	93.465	138.02	66.33
64.655	123.95	39.865	197.65
139.695	637.84	120.6	228.47
427.46	148.07	148.405	-102.51
250.245	87.77	118.255	-32.83
131.32	132.995	29.815	85.09
142.71	154.1	66.33	-17.42
129.98	26.8	200.665	168.17
117.25	139.025	135.675	-162.14
231.82	79.06	105.525	75.71
326.29	105.525	54.27	115.24
124.62	34.17	42.545	172.86
199.66	175.54	56.28	13.4
52.93	225.79	9.38	-6.7
23.45	91.79	101.17	103.18
223.78	44.89	59.965	170.85
61.64	228.135	102.175	24.12
158.12	104.185	135.34	146.06
147.4	5.025	175.205	39.53
90.785	110.215	83.08	18.09
119.93	96.145	109.545	292.79
128.64	38.86	99.495	168.17
34.505	35.845	105.525	155.44
163.815	168.17	148.07	25.46
159.125	215.74	237.85	-8.71
161.47	240.53	103.18	-32.16
68.675	95.475	-59.63	28.14
120.6	190.28	88.44	-134.67
173.865	39.53	336.005	152.76
185.59	262.975	171.855	103.85
250.245	101.84	28.14	83.08
179.56	160.8	42.545	223.78
159.46	167.5	77.385	39.53
146.06	146.06	153.765	-13.4
288.1	80.735	92.795	97.82
244.885	133.665	210.715	93.8
135.005	153.095	185.59	213.73
255.27	325.955	143.045	180.23
106.865	103.18	92.125	426.79
231.82	72.025	134	95.81
224.785	52.595	107.535	125.29
206.36	105.19	103.18	96.48
231.485	100.165	82.745	56.95
161.47	148.405	14.74	220.43
214.735	39.865	95.475	228.47
56.615	206.695	82.745	83.75
33.5	162.14	202.005	-39.53
82.745	41.205	127.3	31.49
24.455	151.42	68.675	113.9
125.625	107.87	126.965	399.99
98.49	240.53	10.05	138.69
218.42	76.715	18.76	190.28
96.145	25.125	90.115	-19.43
111.22	284.415	180.23	66.33
66.665	130.65	103.515	192.29
-15.41	-21.775	158.79	-13.4
189.275	175.875	213.395	-68.34
18.425	-13.4	156.11	13.4
90.115	138.69	103.515	177.55
65.66	259.96	78.39	73.7
144.05	169.845	94.47	-67
114.235	134.67	173.195	217.75
205.02	258.62	72.36	131.32
122.945	126.965	60.635	5.36
68.005	24.455	199.995	150.75
193.965	128.975	25.46	119.93
346.39	95.81	171.52	21.44
133.665	207.7	68.34	225.12
163.145	225.79	153.43	69.01
40.87	107.535	92.795	22.78
200.665	137.35	110.215	162.14
120.935	125.625	141.705	148.07
218.085	119.595	51.925	24.79
95.475	15.075	171.185	148.07
234.165	54.605	79.73	40.87
172.525	84.42	117.25	126.63
87.435	151.085	48.91	148.07
137.015	212.725	104.855	194.3
90.115	35.175	126.63	42.88
241.2	169.51	117.585	112.56
184.585	160.13	139.695	45.56
33.5	168.84	111.89	100.5
150.08	19.095	171.855	123.28
70.35	164.82	67.67	50.25
298.82	94.135	87.1	-107.2
68.675	92.46	106.195	48.91
161.135	228.47	101.505	140.03
171.185	216.745	77.72	-13.4
137.35	190.615	82.41	65.66
71.69	86.43	9.38	-48.91
204.015	94.135	57.955	-10.05
76.045	177.55	80.735	107.87
123.95	94.805	81.405	-28.81
83.08	61.305	18.09	83.75
108.875	253.93	12.73	217.08
132.995	70.35	162.14	46.9
147.065	154.1	169.175	60.97
111.555	82.075	81.74	170.18
132.325	55.61	327.965	-10.72
179.56	59.295	100.835	119.26
130.985	161.47	409.705	195.64
63.315	218.085	199.995	90.45
301.5	207.365	119.26	134
55.275	142.04	230.145	115.24
87.1	248.235	81.405	14.07
125.29	252.59	73.03	56.28
128.975	86.765	61.64	156.78
96.48	87.77	98.155	120.6
101.505	181.235	123.28	205.69
269.005	144.385	77.72	140.7
454.26	207.03	78.055	-34.84
83.08	166.495	82.41	316.91
78.055	79.73	173.865	182.91
65.995	143.045	96.48	41.54
159.125	138.69	110.55	87.1
68.34	146.06	146.395	101.17
170.85	92.46	44.555	-89.11
196.645	426.455	64.99	16.75
206.36	604.34	44.22	144.72
249.575	163.815	63.985	-191.62
95.475	330.31	89.445	48.91
173.53	167.5	109.21	105.19
208.705	183.245	173.195	191.62
138.355	153.095	101.84	171.52
98.49	184.92	56.615	113.23
157.115	145.725	338.685	158.79
167.835	73.7	80.065	-44.89
136.345	179.895	90.45	-68.34
107.535	79.73	73.03	92.46
187.935	177.885	122.945	162.14
181.235	70.015	107.2	191.62
141.705	35.51	321.6	91.12
146.73	63.315	126.965	76.38
240.865	31.49	155.775	-116.58
101.505	235.505	263.98	-18.76
174.535	80.4	45.225	-61.64
169.845	90.45	170.515	50.92
151.755	56.28	123.28	161.47
140.365	181.905	51.925	118.59
185.59	120.935	177.55	237.85
86.095	16.75	208.035	57.62
81.405	265.32	79.395	44.22
165.155	307.865	35.845	6.03
173.195	15.41	58.29	26.8
132.995	100.835	91.79	126.63
36.515	96.145	68.005	38.86
108.205	250.915	192.625	18.76
75.04	190.615	63.65	-4.69
31.825	247.9	157.45	101.84
23.115	144.385	102.51	58.96
161.135	97.485	108.875	-30.15
244.55	115.24	48.575	-14.74
93.465	176.88	96.145	-2.68
378.885	164.485	108.875	-154.1
49.915	49.915	154.77	251.92
112.895	130.315	92.125	114.57
97.82	60.97	19.43	43.55
97.485	167.835	63.985	176.88
93.13	132.66	83.415	-13.4
83.08	110.55	134.67	60.97
221.1	220.095	130.65	41.54
175.54	209.04	21.775	124.62
91.455	277.045	37.855	227.13
228.805	221.435	67	210.38
103.18	70.015	24.79	24.12
195.305	157.45	151.42	146.73
230.815	38.525	51.925	104.52
253.93	118.255	75.71	131.32
101.505	246.56	59.63	251.25
98.155	397.31	132.66	162.14
114.235	79.73	60.3	239.19
212.055	95.14	180.9	52.93
111.89	100.5	177.55	138.69
136.68	113.565	139.36	203.68
102.175	85.425	101.84	75.04
21.775	154.1	97.15	164.15
203.01	216.745	153.43	55.61
157.785	163.815	86.43	-10.72
39.195	295.135	52.26	-55.61
291.115	166.16	151.42	56.95
119.595	-4.02	15.41	146.06
151.755	239.525	63.985	92.46
340.695	97.485	203.345	40.87
93.465	65.325	41.205	-62.31
-28.14	42.545	203.345	-83.08
49.245	143.045	91.455	232.49
89.78	122.275	103.18	106.53
198.99	172.525	30.82	85.76
177.55	131.32	174.2	61.64
321.6	141.37	66.33	332.99
144.72	322.605	242.54	233.83
179.225	99.16	152.425	158.12
167.165	339.355	70.015	103.18
110.55	117.92	184.585	83.75
162.14	31.825	-0.335	-23.45
113.23	94.135	77.05	142.71
170.515	205.355	40.535	-14.74
152.425	48.91	129.645	-80.4
133.665	188.94	128.975	38.19
100.835	86.43	122.61	206.36
284.415	377.545	90.785	-26.8
95.14	200.665	132.995	-62.98
81.74	223.445	118.59	75.71
134	104.52	158.455	174.2
57.955	203.01	103.18	78.39
136.68	301.5	89.445	239.86
162.81	100.5	127.97	64.32
117.25	130.985	58.96	257.95
195.305	144.72	119.595	138.69
187.6	122.275	114.57	80.4
139.36	416.74	113.565	97.82
106.865	109.545	-48.575	36.85
61.64	115.24	107.87	77.05
255.94	149.745	43.885	75.71
95.475	109.21	113.9	213.73
207.7	76.38	174.535	172.86
127.3	98.155	152.09	144.72
73.03	178.22	134	86.43
50.25	85.76	68.675	75.71
85.425	43.215	77.72	-126.63
188.94	81.74	237.515	-55.61
136.01	143.715	174.535	232.49
121.605	135.005	44.555	23.45
490.775	201.335	115.24	141.37
169.51	184.585	115.24	60.97
95.475	111.555	85.76	16.08
130.315	67.335	114.57	65.66
148.07	63.65	165.825	97.82
107.535	198.32	182.91	80.4
92.125	46.23	41.205	46.9
89.11	88.44	130.65	5.36
186.595	90.785	81.07	60.3
90.785	252.59	12.06	267.33
87.1	139.36	191.62	173.53
76.38	149.41	142.375	77.05
163.48	85.76	138.355	36.85
239.19	221.435	101.505	56.28
197.315	103.85	82.075	194.3
208.37	97.485	160.13	137.35
228.47	223.445	132.325	146.73
303.175	138.69	43.885	192.96
179.56	68.005	137.35	180.23
141.705	237.85	198.99	206.36
177.885	97.15	106.195	248.57
244.885	129.98	17.085	83.08
135.005	234.5	85.425	6.7
80.4	182.575	234.165	69.01
98.49	91.12	43.885	130.65
72.695	156.445	64.32	120.6
115.91	447.225	131.655	79.73
95.475	144.72	66.33	133.33
153.43	58.625	142.04	137.35
181.235	33.5	364.145	174.2
23.115	135.005	40.2	-69.68
120.935	224.115	236.51	142.71
62.31	155.44	67.67	-71.69
26.13	241.535	224.785	71.69
176.21	155.775	174.2	-9.38
0.67	202.005	136.345	15.41
113.23	58.96	122.945	-6.7
66.33	138.02	65.995	52.26
146.73	183.245	188.605	119.93
100.165	156.445	52.93	48.91
116.58	143.045	161.47	42.21
130.65	206.695	182.24	39.53
167.5	114.905	94.805	14.07
181.57	6.7	79.06	35.51
82.745	160.8	66.33	93.8
129.31	140.365	96.815	68.34
136.68	157.45	214.735	221.77
176.545	79.73	133.665	14.07
94.805	141.37	92.795	57.62
106.195	106.195	120.265	168.17
127.97	175.54	67.335	233.16
190.28	41.875	29.815	160.8
230.815	80.065	169.175	-31.49
282.07	364.815	88.775	20.1
69.345	281.065	170.85	-14.07
90.785	85.09	192.29	67
190.28	167.5	94.805	247.23
67.67	158.455	198.99	221.1
333.66	67.67	112.225	143.38
106.53	146.395	109.21	230.48
111.89	239.525	124.62	-28.14
95.81	79.73	39.195	190.28
110.55	93.465	96.815	328.97
166.16	13.065	104.185	174.2
132.325	73.7	155.44	113.9
140.03	140.7	69.01	51.59
100.835	183.245	68.34	156.78
136.01	193.965	105.86	79.73
89.445	109.21	80.065	59.63
227.8	119.595	110.55	2.68
202.34	237.18	93.8	-94.47
68.005	-30.82	190.28	194.3
158.455	96.815	53.935	124.62
135.34	220.765	72.695	-1.34
245.22	50.585	54.605	39.53
30.15	71.02	88.775	130.65
157.115	130.65	18.76	39.53
141.705	144.72	8.04	-10.72
140.03	178.89	96.145	186.93
183.58	322.27	98.825	93.8
124.955	240.53	6.03	30.15
67.335	126.295	108.54	151.42
213.73	112.56	100.835	101.84
245.89	193.965	229.475	30.82
5.36	34.84	119.93	178.89
100.5	113.9	125.625	49.58
193.295	170.85	179.895	170.18
50.25	454.595	175.54	196.31
219.425	69.68	71.69	162.14
115.575	77.72	18.76	103.18
220.095	229.475	91.455	-10.05
114.57	41.875	93.465	210.38
80.065	70.015	109.21	196.31
307.53	145.055	110.885	83.08
147.4	182.24	141.035	-61.64
103.85	146.06	36.515	188.27
78.725	53.6	34.17	136.68
179.225	99.83	147.735	-26.8
192.29	277.38	136.345	-58.29
60.97	156.78	135.34	-3.35
204.35	539.35	95.81	83.08
57.955	143.38	54.605	57.62
109.88	110.215	207.365	199.66
134.67	62.98	74.705	154.1
117.92	7.37	-6.7	193.63
122.945	165.825	96.145	197.65
68.675	131.99	132.325	91.79
130.315	50.585	166.83	216.41
72.36	100.5	85.76	79.73
148.07	104.855	43.885	19.43
171.52	134.67	242.54	164.82
101.84	64.32	94.805	36.18
222.44	126.965	51.255	27.47
140.365	70.015	28.475	91.79
117.585	56.95	107.535	239.86
149.745	100.5	75.375	-38.86
126.63	73.365	138.69	155.44
238.185	72.695	140.365	121.27
174.535	331.65	87.435	-40.2
88.775	180.9	64.655	93.13
174.2	-24.12	51.255	123.95
98.825	73.03	180.565	-44.22
158.12	96.145	65.66	178.22
150.08	73.365	64.32	42.21
54.27	46.23	140.365	240.53
155.105	91.12	63.315	198.32
227.13	8.04	67	-62.31
188.27	331.985	112.895	161.47
72.36	221.435	41.875	23.45
211.72	216.41	371.515	175.54
173.865	382.235	53.6	265.32
208.035	55.945	92.46	286.09
158.12	335.67	109.88	174.2
100.5	107.535	84.085	20.1
192.29	236.175	67.67	90.45
181.235	144.72	103.515	103.85
112.225	-13.735	124.285	185.59
207.03	94.135	120.6	559.45
181.235	65.66	100.165	237.18
182.24	115.575	147.735	150.75
243.21	179.895	13.735	-49.58
139.695	139.695	187.265	115.24
182.575	325.62	135.005	212.39
272.69	100.5	38.86	19.43
181.57	191.955	146.395	3.35
237.515	122.275	126.965	40.87
202.675	99.83	171.855	198.99
178.555	156.445	190.615	215.07
199.995	128.975	170.515	53.6
129.31	272.355	136.68	228.47
163.48	157.45	48.91	340.36
103.85	134.67	8.04	260.63
150.75	432.485	105.19	167.5
4.69	250.245	254.935	144.72
143.045	104.855	102.175	28.14
83.08	36.515	100.165	277.38
36.515	99.495	135.005	24.79
226.125	134	115.24	-77.05
150.415	-28.475	135.005	86.43
82.41	90.115	89.445	90.45
195.64	89.11	178.555	50.92
2.68	192.96	98.49	201
119.93	69.01	112.225	86.43
190.615	198.32	116.58	54.27
19.43	293.46	115.24	39.53
91.455	34.17	41.875	95.14
-24.79	250.245	87.1	-32.16
94.135	138.02	161.47	30.15
106.865	19.095	97.82	121.94
26.465	228.47	123.28	209.04
102.51	54.27	160.13	-24.79
93.8	127.97	40.87	39.53
168.17	94.47	31.49	119.93
214.735	71.69	121.27	127.3
153.43	275.37	185.255	8.71
147.4	83.415	70.685	94.47
102.845	178.555	48.24	-6.7
-35.175	105.86	35.175	160.13
71.355	78.055	2.68	26.8
73.7	109.88	85.09	16.75
121.27	146.73	314.565	-8.71
304.515	237.18	163.145	12.73
120.935	122.275	59.295	38.86
84.42	121.94	96.815	98.49
65.66	134.67	100.165	227.8
47.57	24.79	44.22	95.81
129.31	111.22	154.1	110.55
175.875	23.115	208.035	-30.15
122.61	29.815	160.13	68.34
127.635	43.885	105.19	94.47
16.75	60.97	215.07	-25.46
47.905	206.36	9.715	-11.39
161.135	9.045	-4.69	42.21
67	159.795	94.805	55.61
57.62	368.165	176.88	-8.04
188.94	116.58	154.435	96.48
245.89	347.395	57.285	-95.81
40.87	168.84	0.67	-42.21
334.665	108.205	134.335	73.7
-16.415	190.615	151.755	58.29
216.075	59.965	144.72	31.49
62.31	213.73	125.96	34.17
135.005	129.31	184.25	-14.74
175.205	119.93	140.7	27.47
28.14	263.31	95.475	117.92
109.88	130.315	108.875	202.34
196.98	215.74	56.95	52.93
170.18	166.495	128.64	56.95
132.66	46.9	103.85	337.68
100.5	88.105	149.745	101.17
79.73	88.105	169.175	162.81
173.195	169.51	117.92	28.81
143.38	153.765	170.18	133.33
87.435	142.04	162.14	72.36
116.915	128.64	63.315	144.05
103.85	43.55	94.47	215.74
107.535	158.12	46.23	163.48
270.345	127.3	71.69	29.48
133.665	48.575	96.48	86.43
291.785	122.945	65.325	108.54
149.41	39.865	-17.755	79.73
156.445	82.075	22.11	117.92
100.5	113.9	101.84	39.53
105.525	32.83	161.135	127.3
78.725	80.065	61.975	135.34
90.45	64.32	58.29	-11.39
196.98	144.05	20.435	156.78
85.425	46.23	146.06	62.98
141.705	-53.6	122.945	103.18
239.525	196.31	80.4	213.06
9.715	111.555	70.35	324.28
245.89	149.41	90.45	-8.71
70.35	4.02	69.68	40.2
166.495	50.92	47.235	82.41
77.05	225.79	76.045	308.2
173.865	205.69	60.97	139.36
78.39	39.53	15.075	-38.19
86.095	68.34	119.595	87.77
59.965	183.245	57.62	243.88
139.025	93.465	63.985	52.93
108.54	148.74	36.515	112.56
162.14	-11.725	24.12	77.05
29.48	228.135	84.755	105.19
55.945	77.05	100.165	99.16
70.35	305.185	196.31	113.9
104.52	262.64	23.115	95.14
353.09	206.36	76.38	93.8
125.96	96.145	122.275	217.75
65.995	179.56	153.095	42.88
87.77	300.83	78.055	75.04
129.31	249.91	68.005	30.15
28.14	83.08	25.125	178.22
-6.7	196.31	119.595	220.43
90.45	132.66	175.875	-0.67
127.97	178.22	94.135	-1.34
135.675	208.035	117.585	-75.04
239.86	196.31	160.13	101.17
74.37	160.8	121.94	85.09
172.525	155.775	144.05	165.49
27.805	126.295	111.555	163.48
34.84	89.11	79.395	178.22
87.435	102.175	340.695	7.37
124.955	184.25	204.35	20.77
180.23	100.165	53.6	120.6
72.695	150.415	151.755	66.33
121.94	264.315	184.92	237.18
94.47	76.715	39.865	6.03
205.355	268	123.95	-36.18
136.01	158.12	-5.36	85.09
106.53	179.895	158.455	60.3
121.27	214.4	8.04	-114.57
254.935	192.96	31.155	225.79
140.7	83.08	36.85	117.92
51.59	102.845	61.64	-75.71
163.48	157.115	94.805	71.02
72.025	131.32	138.355	103.18
25.46	187.6	81.07	-85.76
57.62	63.985	208.705	-88.44
261.635	36.85	131.32	200.33
127.97	175.205	104.855	88.44
35.51	50.25	125.29	23.45
87.77	153.765	82.745	-6.03
168.505	108.205	125.29	-55.61
33.5	192.96	166.83	255.27
192.29	89.11	191.62	254.6
187.935	149.41	231.82	45.56
48.575	5.025	124.955	-48.24
84.085	27.805	58.625	173.53
85.76	71.69	181.905	139.36
140.365	135.675	221.1	126.63
209.375	434.83	115.24	18.76
166.495	112.895	211.72	53.6
73.365	104.855	148.74	26.8
89.78	159.795	100.835	121.27
215.405	49.245	61.975	62.98
138.02	230.145	110.55	69.01
73.7	135.005	88.105	202.34
202.34	109.545	207.7	-58.29
126.965	257.95	132.66	-12.06
28.475	120.6	76.715	286.76
194.97	116.245	125.625	205.69
88.44	149.41	56.28	312.22
109.545	246.225	211.05	80.4
232.49	140.365	96.815	77.05
156.445	98.155	19.095	164.15
-71.355	157.45	61.975	363.81
167.165	35.845	82.075	259.29
129.98	64.99	133.33	16.08
194.3	428.13	49.915	152.76
150.415	564.475	83.08	231.82
111.555	37.52	142.04	182.91
67	130.985	199.325	180.23
107.535	144.05	64.99	192.29
209.375	162.81	106.195	119.93
142.375	156.78	56.615	211.05
38.19	14.74	51.59	23.45
121.94	250.915	201.67	105.19
138.69	484.075	197.985	-95.14
72.36	180.23	100.165	75.04
161.805	233.83	142.375	-116.58
175.54	32.495	225.455	243.88
39.865	21.775	207.7	247.23
34.17	272.69	72.36	48.91
168.84	110.215	141.035	148.07
363.81	69.01	68.34	18.76
8.375	122.61	143.715	78.39
99.83	13.065	142.71	84.42
68.34	160.465	89.11	174.2
304.18	89.78	86.43	132.66
72.36	108.54	176.21	48.24
239.86	84.755	33.835	273.36
142.375	143.38	155.105	242.54
177.55	208.705	136.68	287.43
129.645	152.09	106.53	72.36
122.275	261.97	92.125	117.92
124.62	155.44	75.71	-46.23
72.36	229.14	42.21	130.65
199.995	232.155	61.975	133.33
40.2	98.825	119.595	20.77
228.135	273.025	96.145	52.93
128.975	105.86	138.69	24.79
144.72	221.1	100.835	34.17
158.12	269.675	106.53	32.16
136.68	234.165	50.25	270.01
14.07	244.55	55.945	304.18
88.44	117.92	93.13	-82.41
1.34	324.95	109.88	-14.07
112.56	108.875	143.38	178.89
61.305	105.19	122.945	117.25
121.27	54.94	121.94	58.29
227.8	177.885	46.9	143.38
43.55	33.165	105.19	47.57
175.875	169.845	163.145	6.03
84.755	-0.67	95.475	-50.25
98.155	205.02	83.75	174.87
102.51	155.44	162.81	-44.22
377.545	118.255	150.08	168.84
149.745	138.02	116.915	148.74
145.725	135.005	64.655	58.96
262.64	68.34	59.63	-119.26
110.215	195.305	127.635	99.16
240.53	317.245	155.105	3.35
79.73	174.87	95.475	-85.76
131.32	195.305	30.485	214.4
89.445	181.235	145.725	20.77
98.825	135.34	81.405	54.27
118.59	108.54	246.56	164.82
97.82	106.195	39.865	123.95
120.935	115.575	33.835	-3.35
190.615	37.855	113.23	334.33
138.69	208.705	193.295	20.1
140.7	107.2	116.915	-30.15
81.405	308.2	53.6	-162.81
144.385	110.215	185.925	284.08
91.12	76.38	123.95	-49.58
267.665	186.26	72.36	128.64
79.06	108.875	94.135	113.9
173.195	95.81	70.015	-18.09
11.39	106.195	154.1	155.44
132.66	58.625	-25.125	160.13
114.235	351.415	34.505	223.78
148.405	34.505	88.775	158.79
109.88	105.525	176.545	130.65
164.15	107.87	98.825	-36.18
111.22	158.455	77.385	-4.02
158.79	183.58	134.335	66.33
73.03	7.37	94.47	205.69
102.51	85.425	109.21	173.53
105.86	42.88	171.52	188.27
82.745	45.895	239.525	164.15
199.66	181.57	205.69	-22.11
138.69	70.35	60.3	20.77
119.26	107.535	197.315	24.79
178.555	119.93	182.24	221.1
149.075	542.365	4.69	140.7
59.295	190.615	61.64	-11.39
236.845	97.82	22.78	18.09
105.86	86.43	73.365	126.63
197.65	-35.51	192.96	-36.18
243.21	111.89	44.89	138.69
101.17	223.445	151.085	83.08
67.67	171.52	16.75	1.34
138.02	125.625	73.03	172.86
186.93	34.505	12.06	187.6
73.365	127.3	108.54	39.53
83.415	45.56	188.94	95.14
126.965	61.975	44.555	142.04
199.325	13.065	240.195	108.54
-16.08	89.78	149.075	23.45
214.065	37.185	206.025	196.98
137.015	-6.03	99.16	152.09
198.655	192.29	80.4	-7.37
180.9	161.135	216.41	68.34
150.08	135.675	30.485	229.14
96.145	158.79	59.63	-26.8
109.21	104.185	142.71	-22.11
92.125	257.615	20.1	109.21
124.62	266.325	61.64	62.31
155.775	58.29	165.49	96.48
148.07	126.295	2.01	225.12
205.69	96.815	131.99	184.92
93.8	104.855	69.345	-61.64
178.555	312.555	81.74	243.88
136.68	62.645	151.085	59.63
104.52	161.135	60.97	78.39
195.975	153.43	165.825	211.05
224.45	123.95	124.955	2.68
98.49	176.545	108.205	-64.99
61.305	51.255	139.695	-38.19
195.64	172.19	157.115	215.74
139.025	62.98	82.41	137.35
90.785	58.625	94.805	17.42
121.605	54.94	87.77	92.46
118.925	131.99	140.365	26.8
224.45	36.515	64.32	121.27
111.555	125.625	69.68	117.92
123.95	163.48	2.345	146.73
211.05	-9.045	71.02	53.6
201	46.565	166.16	157.45
243.545	118.59	144.72	118.59
120.265	165.49	160.465	192.29
132.995	222.44	47.57	71.02
125.29	112.895	79.73	84.42
165.825	131.99	141.37	79.73
152.76	150.415	190.95	46.9
252.925	81.405	90.115	144.05
116.245	157.115	71.355	185.59
167.835	181.235	97.485	12.06
57.285	203.01	272.355	180.9
137.015	145.055	77.72	-24.12
168.505	119.93	137.015	255.27
138.69	168.17	208.035	162.81
130.315	-20.77	110.885	-84.42
230.48	109.545	97.15	150.75
161.135	246.225	12.73	-10.05
148.74	166.495	82.075	-30.82
189.61	98.825	145.39	-77.72
86.095	151.42	138.355	102.51
198.655	16.08	75.375	107.87
159.795	181.57	106.195	97.82
291.45	62.98	231.485	295.47
93.465	60.3	198.655	-2.68
18.425	205.355	19.43	21.44
88.44	124.955	145.725	-136.01
64.99	84.085	71.69	270.68
15.745	79.395	18.76	134
138.355	76.38	107.535	184.92
[truncated: 3,891 more rows]
